# Supplementary material
Source: publisher figshare collection journal article supplement (https://acs.figshare.com/ndownloader/files/5195926)
Supplement: Supplementary file 1 [file 5195926]

 
data_Compound 1
  
_audit_creation_method            SHELXL 
_chemical_name_systematic 
; 
 ? 
; 
_chemical_name_common             ? 
_chemical_formula_moiety          ? 
_chemical_formula_structural      ? 
_chemical_formula_analytical      ? 
_chemical_formula_sum             'C33 H35 O19 La'
_chemical_formula_weight          874.52 
_chemical_melting_point           ? 
_chemical_compound_source         ? 
  
loop_ 
 _atom_type_symbol 
 _atom_type_description 
 _atom_type_scat_dispersion_real 
 _atom_type_scat_dispersion_imag 
 _atom_type_scat_source 
 'C'  'C'   0.0033   0.0016 
 'International Tables Vol C Tables 4.2.6.8 and 6.1.1.4' 
 'H'  'H'   0.0000   0.0000 
 'International Tables Vol C Tables 4.2.6.8 and 6.1.1.4' 
 'O'  'O'   0.0106   0.0060 
 'International Tables Vol C Tables 4.2.6.8 and 6.1.1.4' 
 'La'  'La'  -0.2871   2.4523 
 'International Tables Vol C Tables 4.2.6.8 and 6.1.1.4' 
  
_symmetry_cell_setting            Monoclinic 
_symmetry_space_group_name_H-M    C2/c 
  
loop_ 
 _symmetry_equiv_pos_as_xyz 
 'x, y, z' 
 '-x, y, -z+1/2' 
 'x+1/2, y+1/2, z' 
 '-x+1/2, y+1/2, -z+1/2' 
 '-x, -y, -z' 
 'x, -y, z-1/2' 
 '-x+1/2, -y+1/2, -z' 
 'x+1/2, -y+1/2, z-1/2' 
  
_cell_length_a                    27.6785(5) 
_cell_length_b                    13.6572(3) 
_cell_length_c                    19.7535(4) 
_cell_angle_alpha                 90.00 
_cell_angle_beta                  105.8280(10) 
_cell_angle_gamma                 90.00 
_cell_volume                      7183.9(3) 
_cell_formula_units_Z             8 
_cell_measurement_temperature     150(2) 
_cell_measurement_reflns_used     ? 
_cell_measurement_theta_min       ? 
_cell_measurement_theta_max       ? 
  
_exptl_crystal_description        prisms 
_exptl_crystal_colour             'Pale yellow' 
_exptl_crystal_size_max           0.18 
_exptl_crystal_size_mid           0.16 
_exptl_crystal_size_min           0.08 
_exptl_crystal_density_meas       ? 
_exptl_crystal_density_diffrn     1.617 
_exptl_crystal_density_method     ? 
_exptl_crystal_F_000              3536 
_exptl_absorpt_coefficient_mu     1.272 
_exptl_absorpt_correction_type    Empirical 
_exptl_absorpt_correction_T_min   0.8034 
_exptl_absorpt_correction_T_max   0.9051 
  
_exptl_special_details 
; 
 ? 
; 
  
_diffrn_ambient_temperature       150(2) 
_diffrn_radiation_wavelength      0.71073 
_diffrn_radiation_type            MoK\a 
_diffrn_radiation_source          'fine-focus sealed tube' 
_diffrn_radiation_monochromator   graphite 
_diffrn_measurement_device        'Nonius Kappa CCD' 
_diffrn_measurement_method        '\w scans' 
_diffrn_standards_number          ? 
_diffrn_standards_interval_count  ? 
_diffrn_standards_interval_time   ? 
_diffrn_standards_decay_%         ? 
_diffrn_reflns_number             8085 
_diffrn_reflns_av_R_equivalents   0.0000 
_diffrn_reflns_av_sigmaI/netI     0.0899 
_diffrn_reflns_limit_h_min        0 
_diffrn_reflns_limit_h_max        35 
_diffrn_reflns_limit_k_min        0 
_diffrn_reflns_limit_k_max        17 
_diffrn_reflns_limit_l_min        -25 
_diffrn_reflns_limit_l_max        24 
_diffrn_reflns_theta_min          2.55 
_diffrn_reflns_theta_max          27.55 
_reflns_number_total              8085 
_reflns_number_observed           6232 
_reflns_observed_criterion        >2sigma(I) 
  
_computing_data_collection        ? 
_computing_cell_refinement        ? 
_computing_data_reduction         'Siemens SHELXTL' 
_computing_structure_solution     'SHELXS-86 (Sheldrick, 1990)' 
_computing_structure_refinement   'SHELXL-93 (Sheldrick, 1993)' 
_computing_molecular_graphics     'Siemens SHELXTL' 
_computing_publication_material   'Siemens SHELXTL' 
  
_refine_special_details 
; 
 Refinement on F^2^ for ALL reflections except for 578 with very negative F^2^ 
 or flagged by the user for potential systematic errors.  Weighted R-factors 
 wR and all goodnesses of fit S are based on F^2^, conventional R-factors R 
 are based on F, with F set to zero for negative F^2^. The observed criterion 
 of F^2^ > 2sigma(F^2^) is used only for calculating _R_factor_obs etc. and is 
 not relevant to the choice of reflections for refinement.  R-factors based 
 on F^2^ are statistically about twice as large as those based on F, and R- 
 factors based on ALL data will be even larger. 
; 
  
_refine_ls_structure_factor_coef  Fsqd 
_refine_ls_matrix_type            full 
_refine_ls_weighting_scheme 
 'calc w=1/[\s^2^(Fo^2^)+(0.0077P)^2^+5.4909P] where P=(Fo^2^+2Fc^2^)/3' 
_atom_sites_solution_primary      direct 
_atom_sites_solution_secondary    difmap 
_atom_sites_solution_hydrogens    geom 
_refine_ls_hydrogen_treatment     ? 
_refine_ls_extinction_method      SHELXL 
_refine_ls_extinction_coef        0.00024(4) 
_refine_ls_extinction_expression 
 'Fc^*^=kFc[1+0.001xFc^2^\l^3^/sin(2\q)]^-1/4^' 
_refine_ls_number_reflns          7507 
_refine_ls_number_parameters      540 
_refine_ls_number_restraints      20 
_refine_ls_R_factor_all           0.0636 
_refine_ls_R_factor_obs           0.0355 
_refine_ls_wR_factor_all          0.0806 
_refine_ls_wR_factor_obs          0.0709 
_refine_ls_goodness_of_fit_all    1.072 
_refine_ls_goodness_of_fit_obs    1.107 
_refine_ls_restrained_S_all       1.100 
_refine_ls_restrained_S_obs       1.112 
_refine_ls_shift/esd_max          -0.004 
_refine_ls_shift/esd_mean         0.000 
  
loop_ 
 _atom_site_label 
 _atom_site_type_symbol 
 _atom_site_fract_x 
 _atom_site_fract_y 
 _atom_site_fract_z 
 _atom_site_U_iso_or_equiv 
 _atom_site_thermal_displace_type 
 _atom_site_occupancy 
 _atom_site_calc_flag 
 _atom_site_refinement_flags 
 _atom_site_disorder_group 
La La 0.646997(6) 0.596673(13) 0.231390(7) 0.01577(7) Uani 1 d . . 
C1A C 0.68897(11) 0.6151(2) 0.41972(14) 0.0217(7) Uani 1 d . . 
O1A O 0.68797(8) 0.6181(2) 0.35599(10) 0.0306(6) Uani 1 d . . 
C2A C 0.64955(12) 0.6029(2) 0.45833(15) 0.0228(7) Uani 1 d . . 
O2A O 0.60386(8) 0.5951(2) 0.44197(11) 0.0323(6) Uani 1 d . . 
C3A C 0.69216(12) 0.6055(3) 0.52535(15) 0.0235(7) Uani 1 d . . 
O3A O 0.69512(8) 0.5970(2) 0.58868(10) 0.0315(6) Uani 1 d . . 
C4A C 0.72717(12) 0.6199(2) 0.48376(14) 0.0217(7) Uani 1 d . . 
C5A C 0.78064(11) 0.6322(3) 0.50014(14) 0.0221(7) Uani 1 d . . 
C6A C 0.81077(12) 0.6265(3) 0.56951(15) 0.0293(8) Uani 1 d . . 
H6AA H 0.79559(12) 0.6148(3) 0.60647(15) 0.035 Uiso 1 calc R . 
C7A C 0.86192(12) 0.6374(3) 0.5850(2) 0.0322(8) Uani 1 d . . 
H7AA H 0.88199(12) 0.6319(3) 0.6323(2) 0.039 Uiso 1 calc R . 
C8A C 0.88436(12) 0.6566(3) 0.5310(2) 0.0292(8) Uani 1 d . . 
C9A C 0.85514(12) 0.6636(3) 0.4618(2) 0.0287(8) Uani 1 d . . 
H9AA H 0.87038(12) 0.6771(3) 0.4251(2) 0.034 Uiso 1 calc R . 
C10A C 0.80382(12) 0.6510(3) 0.4466(2) 0.0274(7) Uani 1 d . . 
H10A H 0.78390(12) 0.6551(3) 0.3992(2) 0.033 Uiso 1 calc R . 
O11A O 0.93569(8) 0.6656(2) 0.55132(11) 0.0392(7) Uani 1 d . . 
C12A C 0.95924(14) 0.6985(4) 0.4987(2) 0.0544(13) Uani 1 d . . 
H12A H 0.99566(14) 0.7020(4) 0.5193(2) 0.082 Uiso 1 calc R . 
H12B H 0.94638(14) 0.7635(4) 0.4819(2) 0.082 Uiso 1 calc R . 
H12C H 0.95169(14) 0.6524(4) 0.4592(2) 0.082 Uiso 1 calc R . 
C1B C 0.69435(12) 0.8414(3) 0.25212(15) 0.0252(7) Uani 1 d . . 
O1B O 0.66569(9) 0.7710(2) 0.25049(12) 0.0370(6) Uani 1 d . . 
C2B C 0.74960(11) 0.8536(3) 0.25837(15) 0.0246(7) Uani 1 d . . 
O2B O 0.78506(9) 0.8011(2) 0.25841(12) 0.0367(6) Uani 1 d . . 
C3B C 0.74048(11) 0.9621(3) 0.25721(13) 0.0200(7) Uani 1 d . . 
O3B O 0.76754(7) 1.0354(2) 0.26038(10) 0.0226(5) Uani 1 d . . 
C4B C 0.68784(11) 0.9447(2) 0.24769(13) 0.0206(7) Uani 1 d . . 
C5B C 0.64340(11) 1.0063(3) 0.23235(14) 0.0240(7) Uani 1 d . . 
C6B C 0.64691(11) 1.1077(3) 0.23004(15) 0.0272(8) Uani 1 d . . 
H6BA H 0.67899(11) 1.1382(3) 0.24257(15) 0.033 Uiso 1 calc R . 
C7B C 0.60459(13) 1.1639(3) 0.2099(2) 0.0386(9) Uani 1 d . . 
H7BA H 0.60749(13) 1.2332(3) 0.2090(2) 0.046 Uiso 1 calc R . 
C8B C 0.55734(13) 1.1208(4) 0.1906(2) 0.0439(11) Uani 1 d . . 
C9B C 0.55282(12) 1.0210(4) 0.1940(2) 0.0418(11) Uani 1 d . . 
H9BA H 0.52051(12) 0.9916(4) 0.1820(2) 0.050 Uiso 1 calc R . 
C10B C 0.59553(12) 0.9632(3) 0.2150(2) 0.0333(9) Uani 1 d . . 
H10B H 0.59237(12) 0.8941(3) 0.2176(2) 0.040 Uiso 1 calc R . 
O11B O 0.51742(10) 1.1836(3) 0.16991(14) 0.0658(10) Uani 1 d U . 
C12B C 0.4682(2) 1.1426(5) 0.1401(2) 0.090(2) Uani 1 d U . 
H12D H 0.4434(2) 1.1956(5) 0.1277(2) 0.135 Uiso 1 calc R . 
H12E H 0.4595(2) 1.0992(5) 0.1745(2) 0.135 Uiso 1 calc R . 
H12F H 0.4681(2) 1.1052(5) 0.0977(2) 0.135 Uiso 1 calc R . 
C1C C 0.62903(12) 0.6403(3) -0.0470(2) 0.0263(7) Uani 1 d . . 
O1C O 0.61336(9) 0.6361(2) -0.11205(11) 0.0343(6) Uani 1 d . . 
C2C C 0.60261(13) 0.6513(3) 0.0095(2) 0.0306(8) Uani 1 d . . 
O2C O 0.55875(8) 0.6555(2) 0.01173(11) 0.0442(8) Uani 1 d . . 
C3C C 0.65301(12) 0.6528(3) 0.0609(2) 0.0261(7) Uani 1 d . . 
O3C O 0.66864(8) 0.6637(2) 0.12642(10) 0.0298(6) Uani 1 d . . 
C4C C 0.67671(12) 0.6399(3) 0.00565(15) 0.0246(7) Uani 1 d . . 
C5C C 0.72837(12) 0.6310(3) 0.00512(15) 0.0235(7) Uani 1 d . . 
C6C C 0.76704(12) 0.6321(3) 0.0681(2) 0.0265(7) Uani 1 d . . 
H6CA H 0.75900(12) 0.6378(3) 0.1117(2) 0.032 Uiso 1 calc R . 
C7C C 0.81657(12) 0.6249(3) 0.0674(2) 0.0291(8) Uani 1 d . . 
H7CA H 0.84245(12) 0.6263(3) 0.1104(2) 0.035 Uiso 1 calc R . 
C8C C 0.82864(12) 0.6157(3) 0.0039(2) 0.0269(7) Uani 1 d . . 
C9C C 0.79130(12) 0.6132(3) -0.0591(2) 0.0284(8) Uani 1 d . . 
H9CA H 0.79968(12) 0.6062(3) -0.1024(2) 0.034 Uiso 1 calc R . 
C10C C 0.74142(12) 0.6211(3) -0.0582(2) 0.0273(8) Uani 1 d . . 
H10C H 0.71571(12) 0.6196(3) -0.1013(2) 0.033 Uiso 1 calc R . 
O11C O 0.87865(8) 0.6101(2) 0.00829(11) 0.0358(6) Uani 1 d . . 
C12C C 0.89285(13) 0.5937(3) -0.0551(2) 0.0372(9) Uani 1 d . . 
H12G H 0.92955(13) 0.5913(3) -0.0444(2) 0.056 Uiso 1 calc R . 
H12H H 0.88005(13) 0.6471(3) -0.0883(2) 0.056 Uiso 1 calc R . 
H12I H 0.87870(13) 0.5314(3) -0.0761(2) 0.056 Uiso 1 calc R . 
O21 O 0.64318(9) 0.4248(2) 0.27726(11) 0.0327(6) Uani 1 d D . 
H21A H 0.6618(14) 0.3771(22) 0.2655(22) 0.060(14) Uiso 1 d D . 
H21B H 0.6352(17) 0.3994(34) 0.3148(15) 0.078(16) Uiso 1 d D . 
O22 O 0.57815(8) 0.6021(2) 0.29646(11) 0.0280(5) Uani 1 d D . 
H22A H 0.5526(11) 0.5610(26) 0.2777(19) 0.059(13) Uiso 1 d D . 
H22B H 0.5894(14) 0.5957(30) 0.3435(3) 0.047(12) Uiso 1 d D . 
O23 O 0.56362(8) 0.6525(2) 0.15411(11) 0.0364(7) Uani 1 d D . 
H23A H 0.5549(18) 0.6544(43) 0.1068(2) 0.087(17) Uiso 1 d D . 
H23B H 0.5366(9) 0.6846(27) 0.1598(19) 0.051(12) Uiso 1 d D . 
O24 O 0.61921(8) 0.4771(2) 0.13105(10) 0.0296(5) Uani 1 d D . 
H24A H 0.6415(11) 0.4456(28) 0.1131(18) 0.054(12) Uiso 1 d D . 
H24B H 0.5901(9) 0.4443(31) 0.1159(20) 0.067(15) Uiso 1 d D . 
O30 O 0.5231(4) 0.3833(8) 0.1234(6) 0.037(2) Uani 0.50 d P . 
O31 O 0.4845(3) 0.3571(6) 0.1637(3) 0.064(2) Uiso 0.44 d P . 
O32 O 0.5210(6) 0.4516(15) 0.0670(9) 0.048(4) Uiso 0.18 d P . 
O33 O 0.5184(15) 0.3904(33) 0.1057(16) 0.039(10) Uiso 0.17 d P . 
O34 O 0.5356(10) 0.4118(24) 0.0666(14) 0.041(6) Uiso 0.11 d P . 
O35 O 0.5320(12) 0.4461(28) 0.0322(17) 0.057(8) Uiso 0.10 d P . 
O40 O 0.5021(3) 0.4818(4) 0.2335(3) 0.036(2) Uani 0.50 d P -1 
O50 O 0.9841(2) 0.7488(5) 0.6817(3) 0.0338(12) Uani 0.50 d P . 
O50' O 1.0045(2) 0.7009(5) 0.6778(2) 0.0332(12) Uani 0.50 d P . 
  
loop_ 
 _atom_site_aniso_label 
 _atom_site_aniso_U_11 
 _atom_site_aniso_U_22 
 _atom_site_aniso_U_33 
 _atom_site_aniso_U_23 
 _atom_site_aniso_U_13 
 _atom_site_aniso_U_12 
La 0.01388(10) 0.01778(11) 0.01549(9) -0.00070(7) 0.00373(6) -0.00079(7) 
C1A 0.023(2) 0.020(2) 0.0208(14) -0.0031(12) 0.0030(12) -0.0025(13) 
O1A 0.0272(12) 0.047(2) 0.0175(10) -0.0056(10) 0.0048(9) -0.0026(11) 
C2A 0.025(2) 0.020(2) 0.0227(14) -0.0004(13) 0.0060(12) -0.0022(14) 
O2A 0.0249(12) 0.044(2) 0.0271(11) 0.0012(10) 0.0051(9) -0.0065(12) 
C3A 0.025(2) 0.023(2) 0.0221(14) 0.0013(13) 0.0047(12) -0.0036(14) 
O3A 0.0329(13) 0.042(2) 0.0196(10) 0.0065(10) 0.0065(9) -0.0054(12) 
C4A 0.027(2) 0.018(2) 0.0206(14) 0.0003(12) 0.0068(12) -0.0020(13) 
C5A 0.024(2) 0.021(2) 0.0211(14) -0.0025(12) 0.0057(12) -0.0028(14) 
C6A 0.031(2) 0.038(2) 0.0200(14) -0.0025(14) 0.0084(13) -0.007(2) 
C7A 0.032(2) 0.042(2) 0.0198(15) 0.0001(14) 0.0009(13) -0.007(2) 
C8A 0.023(2) 0.032(2) 0.032(2) -0.0047(15) 0.0062(13) -0.006(2) 
C9A 0.032(2) 0.033(2) 0.0234(15) -0.0027(14) 0.0119(13) -0.004(2) 
C10A 0.029(2) 0.029(2) 0.0227(15) -0.0016(14) 0.0047(13) -0.002(2) 
O11A 0.0242(12) 0.060(2) 0.0326(12) -0.0055(12) 0.0065(10) -0.0117(13) 
C12A 0.031(2) 0.090(4) 0.047(2) -0.007(2) 0.018(2) -0.017(2) 
C1B 0.035(2) 0.020(2) 0.0231(14) -0.0062(13) 0.0133(13) -0.0068(15) 
O1B 0.0477(15) 0.024(2) 0.0479(13) -0.0110(11) 0.0267(12) -0.0161(12) 
C2B 0.028(2) 0.022(2) 0.026(2) -0.0037(13) 0.0118(13) 0.001(2) 
O2B 0.0415(14) 0.0209(15) 0.0538(14) -0.0033(11) 0.0231(12) 0.0030(12) 
C3B 0.021(2) 0.024(2) 0.0148(13) -0.0013(12) 0.0049(11) 0.0000(14) 
O3B 0.0190(10) 0.0201(14) 0.0287(10) 0.0012(9) 0.0065(8) -0.0031(10) 
C4B 0.024(2) 0.025(2) 0.0147(12) -0.0034(12) 0.0081(11) -0.0040(14) 
C5B 0.023(2) 0.029(2) 0.0196(13) 0.0003(13) 0.0061(11) -0.0015(14) 
C6B 0.019(2) 0.037(2) 0.0246(15) 0.0059(14) 0.0046(12) 0.003(2) 
C7B 0.031(2) 0.044(3) 0.043(2) 0.018(2) 0.015(2) 0.013(2) 
C8B 0.024(2) 0.080(4) 0.029(2) 0.016(2) 0.0100(14) 0.016(2) 
C9B 0.018(2) 0.080(4) 0.027(2) -0.006(2) 0.0046(13) -0.006(2) 
C10B 0.027(2) 0.045(3) 0.029(2) -0.009(2) 0.0104(14) -0.012(2) 
O11B 0.0288(14) 0.110(3) 0.058(2) 0.035(2) 0.0118(12) 0.030(2) 
C12B 0.024(2) 0.176(7) 0.068(3) 0.052(4) 0.010(2) 0.024(3) 
C1C 0.032(2) 0.024(2) 0.027(2) 0.0086(14) 0.0146(13) 0.011(2) 
O1C 0.0358(13) 0.046(2) 0.0257(11) 0.0035(11) 0.0153(10) 0.0123(12) 
C2C 0.033(2) 0.037(2) 0.025(2) 0.0107(15) 0.0141(14) 0.009(2) 
O2C 0.0266(13) 0.082(2) 0.0277(12) 0.0159(13) 0.0135(10) 0.0238(14) 
C3C 0.032(2) 0.024(2) 0.028(2) 0.0079(14) 0.0165(14) 0.0040(15) 
O3C 0.0303(12) 0.039(2) 0.0232(11) 0.0072(10) 0.0124(9) -0.0003(11) 
C4C 0.032(2) 0.020(2) 0.0253(15) 0.0060(13) 0.0139(13) 0.0021(15) 
C5C 0.026(2) 0.022(2) 0.0247(14) 0.0051(13) 0.0093(13) 0.0008(14) 
C6C 0.033(2) 0.023(2) 0.0261(15) 0.0032(14) 0.0134(14) 0.002(2) 
C7C 0.028(2) 0.035(2) 0.0247(15) 0.0012(14) 0.0086(13) 0.001(2) 
C8C 0.026(2) 0.025(2) 0.033(2) 0.0019(14) 0.0139(14) -0.0017(14) 
C9C 0.030(2) 0.034(2) 0.0244(15) 0.0016(14) 0.0137(13) 0.004(2) 
C10C 0.027(2) 0.031(2) 0.0252(15) 0.0027(14) 0.0095(13) 0.0033(15) 
O11C 0.0250(12) 0.054(2) 0.0316(11) -0.0017(11) 0.0130(10) 0.0004(12) 
C12C 0.028(2) 0.050(3) 0.039(2) -0.002(2) 0.0185(15) 0.001(2) 
O21 0.0440(15) 0.027(2) 0.0338(12) 0.0092(11) 0.0222(11) 0.0023(12) 
O22 0.0196(11) 0.043(2) 0.0218(10) 0.0001(10) 0.0053(9) -0.0034(11) 
O23 0.0276(13) 0.062(2) 0.0204(11) 0.0071(11) 0.0080(10) 0.0179(13) 
O24 0.0290(13) 0.034(2) 0.0252(11) -0.0096(10) 0.0074(10) -0.0009(12) 
O30 0.022(4) 0.041(5) 0.039(5) -0.013(4) -0.005(4) 0.001(3) 
O40 0.020(2) 0.045(3) 0.040(5) -0.009(2) 0.006(3) 0.002(3) 
O50 0.028(3) 0.038(4) 0.038(3) -0.002(3) 0.012(2) -0.003(3) 
O50' 0.030(3) 0.039(4) 0.030(2) 0.003(2) 0.007(2) -0.008(3) 
  
_geom_special_details 
; 
 All esds (except the esd in the dihedral angle between two l.s. planes) 
 are estimated using the full covariance matrix.  The cell esds are taken 
 into account individually in the estimation of esds in distances, angles 
 and torsion angles; correlations between esds in cell parameters are only 
 used when they are defined by crystal symmetry.  An approximate (isotropic) 
 treatment of cell esds is used for estimating esds involving l.s. planes. 
; 
  
loop_ 
 _geom_bond_atom_site_label_1 
 _geom_bond_atom_site_label_2 
 _geom_bond_distance 
 _geom_bond_site_symmetry_2 
 _geom_bond_publ_flag 
La O1A 2.430(2) . ? 
La O1B 2.443(3) . ? 
La O3B 2.472(2) 4_645 ? 
La O3C 2.485(2) . ? 
La O23 2.513(2) . ? 
La O24 2.521(2) . ? 
La O21 2.528(3) . ? 
La O22 2.574(2) . ? 
C1A O1A 1.252(3) . ? 
C1A C4A 1.412(4) . ? 
C1A C2A 1.501(4) . ? 
C2A O2A 1.221(4) . ? 
C2A C3A 1.514(4) . ? 
C3A O3A 1.237(3) . ? 
C3A C4A 1.445(4) . ? 
C4A C5A 1.436(4) . ? 
C5A C6A 1.398(4) . ? 
C5A C10A 1.402(4) . ? 
C6A C7A 1.373(4) . ? 
C7A C8A 1.398(4) . ? 
C8A O11A 1.373(4) . ? 
C8A C9A 1.389(4) . ? 
C9A C10A 1.380(4) . ? 
O11A C12A 1.441(4) . ? 
C1B O1B 1.242(4) . ? 
C1B C4B 1.421(5) . ? 
C1B C2B 1.509(4) . ? 
C2B O2B 1.215(4) . ? 
C2B C3B 1.503(5) . ? 
C3B O3B 1.241(4) . ? 
C3B C4B 1.437(4) . ? 
O3B La 2.472(2) 4_655 ? 
C4B C5B 1.453(4) . ? 
C5B C6B 1.390(5) . ? 
C5B C10B 1.404(4) . ? 
C6B C7B 1.366(5) . ? 
C7B C8B 1.389(5) . ? 
C8B O11B 1.370(5) . ? 
C8B C9B 1.372(6) . ? 
C9B C10B 1.388(5) . ? 
O11B C12B 1.443(6) . ? 
C1C O1C 1.240(4) . ? 
C1C C4C 1.441(4) . ? 
C1C C2C 1.499(4) . ? 
C2C O2C 1.228(4) . ? 
C2C C3C 1.485(5) . ? 
C3C O3C 1.257(4) . ? 
C3C C4C 1.429(4) . ? 
C4C C5C 1.438(4) . ? 
C5C C10C 1.400(4) . ? 
C5C C6C 1.402(4) . ? 
C6C C7C 1.378(4) . ? 
C7C C8C 1.389(4) . ? 
C8C O11C 1.365(4) . ? 
C8C C9C 1.384(5) . ? 
C9C C10C 1.390(4) . ? 
O11C C12C 1.429(4) . ? 
O30 O34 1.32(3) . ? 
O30 O32 1.44(2) . ? 
O30 O31 1.538(13) . ? 
O31 O33 1.73(4) . ? 
O32 O34 0.68(3) . ? 
O32 O35 0.83(3) . ? 
O32 O33 1.15(4) . ? 
O33 O34 1.05(4) . ? 
O33 O35 1.77(5) . ? 
O34 O35 0.81(4) . ? 
O50 O50' 0.881(6) . ? 
  
loop_ 
 _geom_angle_atom_site_label_1 
 _geom_angle_atom_site_label_2 
 _geom_angle_atom_site_label_3 
 _geom_angle 
 _geom_angle_site_symmetry_1 
 _geom_angle_site_symmetry_3 
 _geom_angle_publ_flag 
O1A La O1B 72.89(8) . . ? 
O1A La O3B 78.48(7) . 4_645 ? 
O1B La O3B 99.27(8) . 4_645 ? 
O1A La O3C 130.45(8) . . ? 
O1B La O3C 71.40(8) . . ? 
O3B La O3C 74.65(7) 4_645 . ? 
O1A La O23 132.56(7) . . ? 
O1B La O23 85.36(9) . . ? 
O3B La O23 147.81(6) 4_645 . ? 
O3C La O23 76.81(7) . . ? 
O1A La O24 146.31(9) . . ? 
O1B La O24 139.37(8) . . ? 
O3B La O24 85.04(7) 4_645 . ? 
O3C La O24 70.95(8) . . ? 
O23 La O24 71.72(8) . . ? 
O1A La O21 78.59(8) . . ? 
O1B La O21 151.26(8) . . ? 
O3B La O21 78.17(7) 4_645 . ? 
O3C La O21 133.16(8) . . ? 
O23 La O21 112.21(9) . . ? 
O24 La O21 69.32(8) . . ? 
O1A La O22 72.27(7) . . ? 
O1B La O22 92.82(8) . . ? 
O3B La O22 143.36(7) 4_645 . ? 
O3C La O22 141.81(7) . . ? 
O23 La O22 67.19(7) . . ? 
O24 La O22 107.62(7) . . ? 
O21 La O22 74.87(8) . . ? 
O1A C1A C4A 134.8(3) . . ? 
O1A C1A C2A 134.0(3) . . ? 
C4A C1A C2A 91.2(2) . . ? 
C1A O1A La 152.9(2) . . ? 
O2A C2A C1A 135.9(3) . . ? 
O2A C2A C3A 137.5(3) . . ? 
C1A C2A C3A 86.6(2) . . ? 
O3A C3A C4A 135.9(3) . . ? 
O3A C3A C2A 134.7(3) . . ? 
C4A C3A C2A 89.4(2) . . ? 
C1A C4A C5A 132.9(3) . . ? 
C1A C4A C3A 92.8(2) . . ? 
C5A C4A C3A 134.2(3) . . ? 
C6A C5A C10A 118.4(3) . . ? 
C6A C5A C4A 121.1(3) . . ? 
C10A C5A C4A 120.5(3) . . ? 
C7A C6A C5A 121.1(3) . . ? 
C6A C7A C8A 119.7(3) . . ? 
O11A C8A C9A 124.1(3) . . ? 
O11A C8A C7A 115.7(3) . . ? 
C9A C8A C7A 120.2(3) . . ? 
C10A C9A C8A 119.6(3) . . ? 
C9A C10A C5A 121.0(3) . . ? 
C8A O11A C12A 116.9(3) . . ? 
O1B C1B C4B 134.3(3) . . ? 
O1B C1B C2B 135.5(3) . . ? 
C4B C1B C2B 90.3(3) . . ? 
C1B O1B La 150.0(2) . . ? 
O2B C2B C3B 135.6(3) . . ? 
O2B C2B C1B 137.4(3) . . ? 
C3B C2B C1B 86.8(2) . . ? 
O3B C3B C4B 135.8(3) . . ? 
O3B C3B C2B 134.3(3) . . ? 
C4B C3B C2B 89.9(3) . . ? 
C3B O3B La 146.1(2) . 4_655 ? 
C1B C4B C3B 92.8(3) . . ? 
C1B C4B C5B 132.4(3) . . ? 
C3B C4B C5B 134.6(3) . . ? 
C6B C5B C10B 118.7(3) . . ? 
C6B C5B C4B 121.4(3) . . ? 
C10B C5B C4B 119.8(3) . . ? 
C7B C6B C5B 120.5(3) . . ? 
C6B C7B C8B 120.7(4) . . ? 
O11B C8B C9B 124.0(4) . . ? 
O11B C8B C7B 116.0(4) . . ? 
C9B C8B C7B 120.0(4) . . ? 
C8B C9B C10B 119.9(3) . . ? 
C9B C10B C5B 120.3(4) . . ? 
C8B O11B C12B 118.3(4) . . ? 
O1C C1C C4C 137.8(3) . . ? 
O1C C1C C2C 132.2(3) . . ? 
C4C C1C C2C 90.0(2) . . ? 
O2C C2C C3C 136.7(3) . . ? 
O2C C2C C1C 136.0(3) . . ? 
C3C C2C C1C 87.3(2) . . ? 
O3C C3C C4C 134.4(3) . . ? 
O3C C3C C2C 134.5(3) . . ? 
C4C C3C C2C 91.0(2) . . ? 
C3C O3C La 136.3(2) . . ? 
C3C C4C C5C 132.9(3) . . ? 
C3C C4C C1C 91.7(2) . . ? 
C5C C4C C1C 135.4(3) . . ? 
C10C C5C C6C 118.2(3) . . ? 
C10C C5C C4C 120.9(3) . . ? 
C6C C5C C4C 120.9(3) . . ? 
C7C C6C C5C 120.8(3) . . ? 
C6C C7C C8C 120.0(3) . . ? 
O11C C8C C9C 123.4(3) . . ? 
O11C C8C C7C 116.0(3) . . ? 
C9C C8C C7C 120.6(3) . . ? 
C8C C9C C10C 119.2(3) . . ? 
C9C C10C C5C 121.2(3) . . ? 
C8C O11C C12C 118.0(3) . . ? 
O34 O30 O32 28.0(13) . . ? 
O34 O30 O31 152.7(15) . . ? 
O32 O30 O31 131.5(10) . . ? 
O30 O31 O33 10.4(13) . . ? 
O34 O32 O35 64.1(31) . . ? 
O34 O32 O33 64.6(36) . . ? 
O35 O32 O33 126.3(41) . . ? 
O34 O32 O30 65.9(31) . . ? 
O35 O32 O30 129.5(34) . . ? 
O33 O32 O30 8.6(21) . . ? 
O34 O33 O32 35.6(21) . . ? 
O34 O33 O31 174.3(33) . . ? 
O32 O33 O31 141.0(36) . . ? 
O34 O33 O35 15.9(22) . . ? 
O32 O33 O35 22.2(17) . . ? 
O31 O33 O35 159.0(27) . . ? 
O32 O34 O35 66.9(39) . . ? 
O32 O34 O33 79.9(38) . . ? 
O35 O34 O33 143.1(50) . . ? 
O32 O34 O30 86.1(33) . . ? 
O35 O34 O30 152.2(46) . . ? 
O33 O34 O30 11.2(23) . . ? 
O34 O35 O32 49.0(28) . . ? 
O34 O35 O33 21.0(29) . . ? 
O32 O35 O33 31.6(26) . . ? 
  
_refine_diff_density_max    1.364 
_refine_diff_density_min   -0.710 
_refine_diff_density_rms    0.114 
  
#===END

 
data_Compound 2
  
_audit_creation_method            SHELXL 
_chemical_name_systematic 
; 
 ? 
; 
_chemical_name_common             ? 
_chemical_formula_moiety          ? 
_chemical_formula_structural      ? 
_chemical_formula_analytical      ? 
_chemical_formula_sum             'C33 H34.50 O18.75 Eu'
_chemical_formula_weight          883.07 
_chemical_melting_point           ? 
_chemical_compound_source         ? 
  
loop_ 
 _atom_type_symbol 
 _atom_type_description 
 _atom_type_scat_dispersion_real 
 _atom_type_scat_dispersion_imag 
 _atom_type_scat_source 
 'C'  'C'   0.0033   0.0016 
 'International Tables Vol C Tables 4.2.6.8 and 6.1.1.4' 
 'H'  'H'   0.0000   0.0000 
 'International Tables Vol C Tables 4.2.6.8 and 6.1.1.4' 
 'O'  'O'   0.0106   0.0060 
 'International Tables Vol C Tables 4.2.6.8 and 6.1.1.4' 
 'Eu'  'Eu'  -0.1578   3.6682 
 'International Tables Vol C Tables 4.2.6.8 and 6.1.1.4' 
  
_symmetry_cell_setting            Monoclinic 
_symmetry_space_group_name_H-M    P2/c 
  
loop_ 
 _symmetry_equiv_pos_as_xyz 
 'x, y, z' 
 '-x, y, -z+1/2' 
 '-x, -y, -z' 
 'x, -y, z-1/2' 
  
_cell_length_a                    27.9447(4) 
_cell_length_b                    13.5745(2) 
_cell_length_c                    19.5747(2) 
_cell_angle_alpha                 90.00 
_cell_angle_beta                  108.6297(6) 
_cell_angle_gamma                 90.00 
_cell_volume                      7036.3(2) 
_cell_formula_units_Z             8 
_cell_measurement_temperature     150(2) 
_cell_measurement_reflns_used     ? 
_cell_measurement_theta_min       ? 
_cell_measurement_theta_max       ? 
  
_exptl_crystal_description        prisms 
_exptl_crystal_colour             'Pale yellow' 
_exptl_crystal_size_max           0.23 
_exptl_crystal_size_mid           0.15 
_exptl_crystal_size_min           0.12 
_exptl_crystal_density_meas       ? 
_exptl_crystal_density_diffrn     1.667 
_exptl_crystal_density_method     ? 
_exptl_crystal_F_000              3564 
_exptl_absorpt_coefficient_mu     1.866 
_exptl_absorpt_correction_type    Empirical 
_exptl_absorpt_correction_T_min   0.6735 
_exptl_absorpt_correction_T_max   0.8071 
  
_exptl_special_details 
; 
 ? 
; 
  
_diffrn_ambient_temperature       150(2) 
_diffrn_radiation_wavelength      0.71073 
_diffrn_radiation_type            MoK\a 
_diffrn_radiation_source          'fine-focus sealed tube' 
_diffrn_radiation_monochromator   graphite 
_diffrn_measurement_device        'Nonius Kappa CCD' 
_diffrn_measurement_method        '\w scans' 
_diffrn_standards_number          ? 
_diffrn_standards_interval_count  ? 
_diffrn_standards_interval_time   ? 
_diffrn_standards_decay_%         ? 
_diffrn_reflns_number             16036 
_diffrn_reflns_av_R_equivalents   0.0000 
_diffrn_reflns_av_sigmaI/netI     0.0738 
_diffrn_reflns_limit_h_min        -36 
_diffrn_reflns_limit_h_max        34 
_diffrn_reflns_limit_k_min        -17 
_diffrn_reflns_limit_k_max        0 
_diffrn_reflns_limit_l_min        0 
_diffrn_reflns_limit_l_max        25 
_diffrn_reflns_theta_min          2.55 
_diffrn_reflns_theta_max          27.46 
_reflns_number_total              16036 
_reflns_number_observed           10811 
_reflns_observed_criterion        >2sigma(I) 
  
_computing_data_collection        ? 
_computing_cell_refinement        ? 
_computing_data_reduction         'Siemens SHELXTL' 
_computing_structure_solution     'SHELXS-86 (Sheldrick, 1990)' 
_computing_structure_refinement   'SHELXL-93 (Sheldrick, 1993)' 
_computing_molecular_graphics     'Siemens SHELXTL' 
_computing_publication_material   'Siemens SHELXTL' 
  
_refine_special_details 
; 
 Refinement on F^2^ for ALL reflections except for 1798 with very negative F^2^ 
 or flagged by the user for potential systematic errors.  Weighted R-factors 
 wR and all goodnesses of fit S are based on F^2^, conventional R-factors R 
 are based on F, with F set to zero for negative F^2^. The observed criterion 
 of F^2^ > 2sigma(F^2^) is used only for calculating _R_factor_obs etc. and is 
 not relevant to the choice of reflections for refinement.  R-factors based 
 on F^2^ are statistically about twice as large as those based on F, and R- 
 factors based on ALL data will be even larger. 
; 
  
_refine_ls_structure_factor_coef  Fsqd 
_refine_ls_matrix_type            full 
_refine_ls_weighting_scheme 
 'calc w=1/[\s^2^(Fo^2^)+(0.0533P)^2^+0.0000P] where P=(Fo^2^+2Fc^2^)/3' 
_atom_sites_solution_primary      direct 
_atom_sites_solution_secondary    difmap 
_atom_sites_solution_hydrogens    geom 
_refine_ls_hydrogen_treatment     ? 
_refine_ls_extinction_method      SHELXL 
_refine_ls_extinction_coef        0.00049(7) 
_refine_ls_extinction_expression 
 'Fc^*^=kFc[1+0.001xFc^2^\l^3^/sin(2\q)]^-1/4^' 
_refine_ls_number_reflns          14238 
_refine_ls_number_parameters      1018 
_refine_ls_number_restraints      33 
_refine_ls_R_factor_all           0.0789 
_refine_ls_R_factor_obs           0.0429 
_refine_ls_wR_factor_all          0.1247 
_refine_ls_wR_factor_obs          0.1034 
_refine_ls_goodness_of_fit_all    1.064 
_refine_ls_goodness_of_fit_obs    1.136 
_refine_ls_restrained_S_all       1.117 
_refine_ls_restrained_S_obs       1.149 
_refine_ls_shift/esd_max          -0.003 
_refine_ls_shift/esd_mean         0.000 
  
loop_ 
 _atom_site_label 
 _atom_site_type_symbol 
 _atom_site_fract_x 
 _atom_site_fract_y 
 _atom_site_fract_z 
 _atom_site_U_iso_or_equiv 
 _atom_site_thermal_displace_type 
 _atom_site_occupancy 
 _atom_site_calc_flag 
 _atom_site_refinement_flags 
 _atom_site_disorder_group 
Eu1 Eu 0.345017(8) 1.40804(2) 0.299168(10) 0.01963(8) Uani 1 d . . 
Eu2 Eu 0.149241(8) 0.90939(2) 0.244110(10) 0.02088(8) Uani 1 d . . 
C1A C 0.3014(2) 1.3911(3) 0.1101(2) 0.0260(10) Uani 1 d . . 
O1A O 0.30165(12) 1.3950(2) 0.1751(2) 0.0305(8) Uani 1 d . . 
C2A C 0.3412(2) 1.3990(4) 0.0757(2) 0.0286(11) Uani 1 d . . 
O2A O 0.38745(13) 1.4077(3) 0.0970(2) 0.0373(9) Uani 1 d . . 
C3A C 0.3005(2) 1.3915(3) 0.0038(2) 0.0268(10) Uani 1 d . . 
O3A O 0.29879(13) 1.3955(3) -0.0594(2) 0.0327(8) Uani 1 d . . 
C4A C 0.2640(2) 1.3799(3) 0.0422(2) 0.0261(10) Uani 1 d . . 
C5A C 0.2104(2) 1.3665(3) 0.0189(2) 0.0252(10) Uani 1 d . . 
C6A C 0.1832(2) 1.3608(4) -0.0555(2) 0.0296(11) Uani 1 d . . 
H6AA H 0.2009(2) 1.3651(4) -0.0895(2) 0.036 Uiso 1 calc R . 
C7A C 0.1320(2) 1.3492(4) -0.0795(2) 0.0310(11) Uani 1 d . . 
H7AA H 0.1144(2) 1.3449(4) -0.1297(2) 0.037 Uiso 1 calc R . 
C8A C 0.1054(2) 1.3435(4) -0.0303(2) 0.0318(11) Uani 1 d D . 
C9A C 0.1315(2) 1.3464(4) 0.0437(3) 0.0401(13) Uani 1 d . . 
H9AA H 0.1137(2) 1.3396(4) 0.0774(3) 0.048 Uiso 1 calc R . 
C10A C 0.1831(2) 1.3590(4) 0.0677(2) 0.0348(12) Uani 1 d . . 
H10A H 0.2005(2) 1.3627(4) 0.1180(2) 0.042 Uiso 1 calc R . 
O11A O 0.05456(14) 1.3328(3) -0.0543(2) 0.0557(12) Uani 1 d D . 
C12A C 0.0246(4) 1.3581(9) -0.0117(6) 0.046(3) Uani 0.50 d PD 1 
H12A H -0.0109(4) 1.3451(9) -0.0385(6) 0.070 Uiso 0.50 calc PR 1 
H12B H 0.0290(4) 1.4282(9) 0.0007(6) 0.070 Uiso 0.50 calc PR 1 
H12C H 0.0348(4) 1.3187(9) 0.0326(6) 0.070 Uiso 0.50 calc PR 1 
C12' C 0.0260(4) 1.3126(9) -0.1256(5) 0.051(3) Uani 0.50 d PD 2 
H12D H -0.0098(4) 1.3082(9) -0.1295(5) 0.076 Uiso 0.50 calc PR 2 
H12E H 0.0370(4) 1.2498(9) -0.1404(5) 0.076 Uiso 0.50 calc PR 2 
H12F H 0.0307(4) 1.3654(9) -0.1569(5) 0.076 Uiso 0.50 calc PR 2 
C1B C 0.2995(2) 1.1667(4) 0.2705(2) 0.0259(10) Uani 1 d . . 
O1B O 0.32651(12) 1.2408(2) 0.2749(2) 0.0317(8) Uani 1 d . . 
C2B C 0.2453(2) 1.1475(3) 0.2637(2) 0.0253(10) Uani 1 d . . 
O2B O 0.20912(12) 1.1955(2) 0.2665(2) 0.0298(7) Uani 1 d . . 
C3B C 0.2569(2) 1.0403(3) 0.2607(2) 0.0223(9) Uani 1 d . . 
O3B O 0.23159(11) 0.9627(2) 0.25266(15) 0.0268(7) Uani 1 d . . 
C4B C 0.3085(2) 1.0633(3) 0.2711(2) 0.0246(10) Uani 1 d . . 
C5B C 0.3546(2) 1.0051(4) 0.2833(2) 0.0257(10) Uani 1 d . . 
C6B C 0.3524(2) 0.9033(4) 0.2826(3) 0.0317(11) Uani 1 d . . 
H6BA H 0.3206(2) 0.8712(4) 0.2709(3) 0.038 Uiso 1 calc R . 
C7B C 0.3960(2) 0.8478(4) 0.2989(3) 0.0377(12) Uani 1 d . . 
H7BA H 0.3945(2) 0.7779(4) 0.2981(3) 0.045 Uiso 1 calc R . 
C8B C 0.4424(2) 0.8961(4) 0.3164(3) 0.0396(13) Uani 1 d . . 
C9B C 0.4456(2) 0.9973(4) 0.3179(3) 0.0391(13) Uani 1 d . . 
H9BA H 0.4776(2) 1.0289(4) 0.3304(3) 0.047 Uiso 1 calc R . 
C10B C 0.4015(2) 1.0526(4) 0.3008(2) 0.0326(11) Uani 1 d . . 
H10B H 0.4031(2) 1.1225(4) 0.3010(2) 0.039 Uiso 1 calc R . 
O11B O 0.48385(14) 0.8346(3) 0.3303(2) 0.0575(12) Uani 1 d . . 
C12B C 0.5339(2) 0.8822(5) 0.3557(3) 0.060(2) Uani 1 d . . 
H12A H 0.5603(2) 0.8320(5) 0.3638(3) 0.089 Uiso 1 calc R . 
H12B H 0.5376(2) 0.9172(5) 0.4009(3) 0.089 Uiso 1 calc R . 
H12C H 0.5369(2) 0.9291(5) 0.3193(3) 0.089 Uiso 1 calc R . 
C1C C 0.3603(2) 1.3567(4) 0.5765(2) 0.0269(10) Uani 1 d . . 
O1C O 0.37567(13) 1.3586(3) 0.6429(2) 0.0382(9) Uani 1 d . . 
C2C C 0.3869(2) 1.3441(4) 0.5213(2) 0.0270(10) Uani 1 d . . 
O2C O 0.43043(12) 1.3314(3) 0.5221(2) 0.0389(9) Uani 1 d . . 
C3C C 0.3362(2) 1.3494(3) 0.4646(2) 0.0247(10) Uani 1 d . . 
O3C O 0.32132(11) 1.3438(2) 0.39748(15) 0.0270(7) Uani 1 d . . 
C4C C 0.3122(2) 1.3616(3) 0.5191(2) 0.0212(9) Uani 1 d . . 
C5C C 0.2603(2) 1.3718(3) 0.5151(2) 0.0230(9) Uani 1 d . . 
C6C C 0.2223(2) 1.3752(4) 0.4476(2) 0.0268(10) Uani 1 d . . 
H6CA H 0.2312(2) 1.3720(4) 0.4047(2) 0.032 Uiso 1 calc R . 
C7C C 0.1727(2) 1.3832(4) 0.4431(2) 0.0300(11) Uani 1 d . . 
H7CA H 0.1473(2) 1.3860(4) 0.3973(2) 0.036 Uiso 1 calc R . 
C8C C 0.1591(2) 1.3872(4) 0.5056(2) 0.0268(10) Uani 1 d D . 
C9C C 0.1957(2) 1.3851(4) 0.5728(2) 0.0275(10) Uani 1 d . . 
H9CA H 0.1863(2) 1.3886(4) 0.6152(2) 0.033 Uiso 1 calc R . 
C10C C 0.2458(2) 1.3778(4) 0.5775(2) 0.0256(10) Uani 1 d . . 
H10C H 0.2710(2) 1.3769(4) 0.6236(2) 0.031 Uiso 1 calc R . 
O11C O 0.10951(12) 1.3936(3) 0.5007(2) 0.0352(9) Uani 1 d D . 
C12C C 0.0726(3) 1.3935(8) 0.4315(4) 0.038(3) Uani 0.50 d PD 1 
H12G H 0.0389(3) 1.3984(8) 0.4365(4) 0.057 Uiso 0.50 calc PR 1 
H12H H 0.0751(3) 1.3321(8) 0.4064(4) 0.057 Uiso 0.50 calc PR 1 
H12I H 0.0783(3) 1.4497(8) 0.4037(4) 0.057 Uiso 0.50 calc PR 1 
C12" C 0.0930(4) 1.4104(8) 0.5626(4) 0.037(2) Uani 0.50 d PD 2 
H12J H 0.0560(4) 1.4125(8) 0.5472(4) 0.055 Uiso 0.50 calc PR 2 
H12K H 0.1066(4) 1.4732(8) 0.5852(4) 0.055 Uiso 0.50 calc PR 2 
H12L H 0.1052(4) 1.3569(8) 0.5975(4) 0.055 Uiso 0.50 calc PR 2 
C1D C 0.2030(2) 0.8886(3) 0.4333(2) 0.0293(11) Uani 1 d . . 
O1D O 0.19927(12) 0.8940(2) 0.3671(2) 0.0308(8) Uani 1 d . . 
C2D C 0.1654(2) 0.8937(3) 0.4730(2) 0.0279(11) Uani 1 d . . 
O2D O 0.11909(13) 0.8977(3) 0.4558(2) 0.0336(8) Uani 1 d . . 
C3D C 0.2096(2) 0.8884(3) 0.5418(2) 0.0303(11) Uani 1 d . . 
O3D O 0.21424(13) 0.8924(3) 0.6065(2) 0.0349(8) Uani 1 d . . 
C4D C 0.2436(2) 0.8788(3) 0.4992(2) 0.0274(10) Uani 1 d . . 
C5D C 0.2970(2) 0.8653(4) 0.5166(2) 0.0282(11) Uani 1 d . . 
C6D C 0.3282(2) 0.8669(4) 0.5893(2) 0.0348(12) Uani 1 d . . 
H6DA H 0.3134(2) 0.8751(4) 0.6264(2) 0.042 Uiso 1 calc R . 
C7D C 0.3793(2) 0.8569(4) 0.6070(3) 0.0429(14) Uani 1 d . . 
H7DA H 0.4000(2) 0.8594(4) 0.6560(3) 0.052 Uiso 1 calc R . 
C8D C 0.4012(2) 0.8430(4) 0.5522(3) 0.0422(13) Uani 1 d . . 
C9D C 0.3706(2) 0.8392(4) 0.4802(3) 0.0409(13) Uani 1 d . . 
H9DA H 0.3851(2) 0.8288(4) 0.4430(3) 0.049 Uiso 1 calc R . 
C10D C 0.3191(2) 0.8510(4) 0.4637(2) 0.0342(12) Uani 1 d . . 
H10D H 0.2983(2) 0.8491(4) 0.4147(2) 0.041 Uiso 1 calc R . 
O11D O 0.45268(15) 0.8347(4) 0.5754(2) 0.0603(12) Uani 1 d . . 
C12D C 0.4770(3) 0.8288(6) 0.5208(4) 0.073(2) Uani 1 d . . 
H12D H 0.5136(3) 0.8230(6) 0.5439(4) 0.110 Uiso 1 calc R . 
H12E H 0.4695(3) 0.8883(6) 0.4910(4) 0.110 Uiso 1 calc R . 
H12F H 0.4645(3) 0.7709(6) 0.4905(4) 0.110 Uiso 1 calc R . 
C1E C 0.1914(2) 0.6692(4) 0.2690(2) 0.0290(11) Uani 1 d . . 
O1E O 0.16137(14) 0.7392(3) 0.2647(2) 0.0385(9) Uani 1 d . . 
C2E C 0.2469(2) 0.6576(3) 0.2809(2) 0.0259(10) Uani 1 d . . 
O2E O 0.28254(15) 0.7108(3) 0.2848(2) 0.0425(9) Uani 1 d . . 
C3E C 0.2378(2) 0.5484(3) 0.2793(2) 0.0238(10) Uani 1 d . . 
O3E O 0.26488(11) 0.4739(2) 0.2871(2) 0.0252(7) Uani 1 d . . 
C4E C 0.1851(2) 0.5649(3) 0.2643(2) 0.0241(10) Uani 1 d . . 
C5E C 0.1419(2) 0.4987(4) 0.2464(2) 0.0278(11) Uani 1 d . . 
C6E C 0.1490(2) 0.3995(4) 0.2434(2) 0.0279(11) Uani 1 d . . 
H6EA H 0.1823(2) 0.3740(4) 0.2558(2) 0.033 Uiso 1 calc R . 
C7E C 0.1084(2) 0.3357(4) 0.2225(2) 0.0355(12) Uani 1 d . . 
H7EA H 0.1137(2) 0.2667(4) 0.2211(2) 0.043 Uiso 1 calc R . 
C8E C 0.0595(2) 0.3741(5) 0.2036(3) 0.0439(15) Uani 1 d D . 
C9E C 0.0520(2) 0.4747(5) 0.2068(3) 0.046(2) Uani 1 d . . 
H9EA H 0.0187(2) 0.5004(5) 0.1941(3) 0.055 Uiso 1 calc R . 
C10E C 0.0931(2) 0.5377(5) 0.2285(3) 0.0426(14) Uani 1 d . . 
H10E H 0.0881(2) 0.6067(5) 0.2313(3) 0.051 Uiso 1 calc R . 
O11E O 0.0193(2) 0.3146(5) 0.1819(3) 0.103(2) Uani 1 d DU . 
C12E C 0.0171(4) 0.2179(7) 0.1910(6) 0.058(4) Uani 0.50 d PD 1 
H12M H -0.0177(4) 0.1953(7) 0.1690(6) 0.087 Uiso 0.50 calc PR 1 
H12N H 0.0284(4) 0.2027(7) 0.2426(6) 0.087 Uiso 0.50 calc PR 1 
H12O H 0.0391(4) 0.1845(7) 0.1681(6) 0.087 Uiso 0.50 calc PR 1 
C12* C -0.0260(3) 0.3302(8) 0.1297(5) 0.037(2) Uani 0.50 d PD 2 
H12P H -0.0478(3) 0.2726(8) 0.1265(5) 0.056 Uiso 0.50 calc PR 2 
H12Q H -0.0206(3) 0.3406(8) 0.0833(5) 0.056 Uiso 0.50 calc PR 2 
H12R H -0.0423(3) 0.3885(8) 0.1420(5) 0.056 Uiso 0.50 calc PR 2 
C1F C 0.1150(2) 0.8703(3) -0.0371(2) 0.0218(9) Uani 1 d . . 
O1F O 0.09887(11) 0.8835(2) -0.1035(2) 0.0266(7) Uani 1 d . . 
C2F C 0.0899(2) 0.8570(4) 0.0195(2) 0.0253(10) Uani 1 d . . 
O2F O 0.04671(12) 0.8583(3) 0.0217(2) 0.0361(9) Uani 1 d . . 
C3F C 0.1412(2) 0.8468(3) 0.0731(2) 0.0211(9) Uani 1 d . . 
O3F O 0.15720(11) 0.8323(2) 0.13965(14) 0.0253(7) Uani 1 d . . 
C4F C 0.1639(2) 0.8598(3) 0.0181(2) 0.0194(9) Uani 1 d . . 
C5F C 0.2154(2) 0.8660(3) 0.0188(2) 0.0198(9) Uani 1 d . . 
C6F C 0.2551(2) 0.8706(4) 0.0844(2) 0.0249(10) Uani 1 d . . 
H6FA H 0.2481(2) 0.8683(4) 0.1287(2) 0.030 Uiso 1 calc R . 
C7F C 0.3043(2) 0.8784(4) 0.0845(2) 0.0263(10) Uani 1 d . . 
H7FA H 0.3310(2) 0.8815(4) 0.1290(2) 0.032 Uiso 1 calc R . 
C8F C 0.3150(2) 0.8819(3) 0.0196(2) 0.0241(10) Uani 1 d . . 
C9F C 0.2766(2) 0.8767(4) -0.0456(2) 0.0278(10) Uani 1 d . . 
H9FA H 0.2840(2) 0.8781(4) -0.0897(2) 0.033 Uiso 1 calc R . 
C10F C 0.2269(2) 0.8695(4) -0.0458(2) 0.0254(10) Uani 1 d . . 
H10F H 0.2003(2) 0.8668(4) -0.0905(2) 0.031 Uiso 1 calc R . 
O11F O 0.36501(12) 0.8889(3) 0.0253(2) 0.0333(8) Uani 1 d . . 
C12F C 0.3772(2) 0.8996(4) -0.0398(3) 0.0377(13) Uani 1 d . . 
H12G H 0.4139(2) 0.9037(4) -0.0284(3) 0.057 Uiso 1 calc R . 
H12H H 0.3616(2) 0.9598(4) -0.0647(3) 0.057 Uiso 1 calc R . 
H12I H 0.3645(2) 0.8426(4) -0.0710(3) 0.057 Uiso 1 calc R . 
O21 O 0.35113(14) 1.5759(3) 0.2556(2) 0.0386(9) Uani 1 d . . 
O22 O 0.41160(13) 1.3993(3) 0.2437(2) 0.0434(10) Uani 1 d . . 
O23 O 0.42321(12) 1.3380(3) 0.3802(2) 0.0376(9) Uani 1 d . . 
O24 O 0.37304(12) 1.5241(3) 0.4000(2) 0.0332(8) Uani 1 d . . 
O31 O 0.13403(12) 1.0694(2) 0.2876(2) 0.0275(7) Uani 1 d . . 
O32 O 0.08860(13) 0.8791(3) 0.3089(2) 0.0347(8) Uani 1 d . . 
O33 O 0.06042(12) 0.9043(3) 0.1638(2) 0.0346(9) Uani 1 d . . 
O34 O 0.13967(12) 1.0374(2) 0.15253(15) 0.0305(8) Uani 1 d . . 
O40 O 0.0068(3) 1.2488(6) -0.1978(4) 0.042(2) Uani 0.50 d P 1 
O50 O -0.0171(2) 0.0008(5) 0.1920(3) 0.0279(14) Uani 0.50 d P 1 
O51 O 0.0028(2) 0.0777(5) 0.1714(3) 0.0255(14) Uani 0.50 d P 2 
O60 O 0.0587(4) 0.8844(8) 0.5504(6) 0.031(3) Uani 0.50 d P . 
O61 O 0.0583(10) 0.9137(14) 0.5434(13) 0.024(6) Uiso 0.25 d P . 
O62 O 0.0615(9) 0.8592(16) 0.5593(13) 0.015(5) Uiso 0.25 d P . 
O70 O 0.4661(3) 0.3909(6) 0.8983(5) 0.085(3) Uani 0.70 d PU . 
O71 O 0.4713(11) 0.4142(22) 0.9369(15) 0.127(8) Uiso 0.30 d PU . 
O80 O 0.5214(5) 0.4466(12) 0.8288(7) 0.059(4) Uiso 0.30 d P . 
O81 O 0.5164(9) 0.3533(19) 0.8043(12) 0.071(7) Uiso 0.20 d P . 
O82 O 0.5431(7) 0.4151(14) 0.7474(9) 0.059(5) Uiso 0.25 d P . 
O83 O 0.5389(8) 0.3358(17) 0.7477(10) 0.072(5) Uiso 0.25 d P . 
O90 O 0.5173(5) 0.5775(10) 0.9266(7) 0.046(3) Uiso 0.30 d P . 
O91 O 0.5060(5) 0.5759(11) 0.8572(8) 0.056(4) Uiso 0.30 d P . 
O92 O 0.5059(5) 0.6502(10) 0.8419(7) 0.046(3) Uiso 0.30 d P . 
O93 O 0.4924(14) 0.7365(29) 0.7790(18) 0.044(9) Uiso 0.10 d P . 
  
loop_ 
 _atom_site_aniso_label 
 _atom_site_aniso_U_11 
 _atom_site_aniso_U_22 
 _atom_site_aniso_U_33 
 _atom_site_aniso_U_23 
 _atom_site_aniso_U_13 
 _atom_site_aniso_U_12 
Eu1 0.01691(12) 0.02408(14) 0.01858(12) -0.00082(8) 0.00665(8) -0.00243(9) 
Eu2 0.02229(13) 0.02131(13) 0.01600(11) -0.00142(8) 0.00182(8) 0.00476(9) 
C1A 0.030(3) 0.024(3) 0.025(2) 0.003(2) 0.010(2) 0.000(2) 
O1A 0.030(2) 0.041(2) 0.021(2) -0.0018(14) 0.0091(13) 0.001(2) 
C2A 0.033(3) 0.028(3) 0.026(2) -0.001(2) 0.011(2) 0.003(2) 
O2A 0.032(2) 0.052(2) 0.030(2) -0.001(2) 0.0135(15) 0.001(2) 
C3A 0.037(3) 0.021(3) 0.024(2) 0.000(2) 0.012(2) 0.000(2) 
O3A 0.044(2) 0.037(2) 0.021(2) 0.0015(14) 0.0150(14) 0.000(2) 
C4A 0.035(3) 0.020(2) 0.024(2) 0.000(2) 0.011(2) 0.001(2) 
C5A 0.028(2) 0.024(3) 0.024(2) -0.003(2) 0.009(2) 0.002(2) 
C6A 0.041(3) 0.031(3) 0.020(2) -0.001(2) 0.014(2) -0.004(2) 
C7A 0.040(3) 0.029(3) 0.022(2) -0.003(2) 0.007(2) -0.005(2) 
C8A 0.034(3) 0.030(3) 0.034(3) -0.002(2) 0.012(2) -0.003(2) 
C9A 0.042(3) 0.054(4) 0.029(3) -0.005(2) 0.019(2) -0.005(3) 
C10A 0.039(3) 0.046(3) 0.019(2) -0.004(2) 0.010(2) -0.001(3) 
O11A 0.031(2) 0.080(3) 0.053(2) -0.025(2) 0.010(2) -0.006(2) 
C12A 0.046(7) 0.053(8) 0.046(6) 0.001(6) 0.023(5) 0.001(6) 
C12' 0.029(6) 0.052(8) 0.060(7) 0.005(6) -0.001(5) 0.002(5) 
C1B 0.033(3) 0.027(3) 0.016(2) -0.001(2) 0.004(2) -0.004(2) 
O1B 0.037(2) 0.028(2) 0.032(2) -0.0043(14) 0.0136(14) -0.007(2) 
C2B 0.031(3) 0.026(3) 0.015(2) -0.001(2) 0.001(2) 0.000(2) 
O2B 0.033(2) 0.025(2) 0.031(2) -0.0005(14) 0.0099(14) -0.001(2) 
C3B 0.025(2) 0.023(3) 0.014(2) -0.001(2) 0.000(2) 0.000(2) 
O3B 0.027(2) 0.025(2) 0.025(2) 0.0024(13) 0.0032(12) -0.0003(14) 
C4B 0.033(3) 0.024(3) 0.015(2) -0.004(2) 0.005(2) -0.002(2) 
C5B 0.027(2) 0.029(3) 0.019(2) -0.004(2) 0.005(2) 0.001(2) 
C6B 0.029(3) 0.029(3) 0.031(2) -0.003(2) 0.002(2) -0.003(2) 
C7B 0.034(3) 0.028(3) 0.043(3) 0.001(2) 0.000(2) 0.002(2) 
C8B 0.033(3) 0.045(4) 0.031(3) -0.002(2) -0.003(2) 0.008(3) 
C9B 0.027(3) 0.050(4) 0.036(3) -0.007(2) 0.003(2) -0.003(2) 
C10B 0.032(3) 0.034(3) 0.031(2) -0.002(2) 0.008(2) -0.004(2) 
O11B 0.029(2) 0.054(3) 0.075(3) -0.003(2) -0.005(2) 0.008(2) 
C12B 0.030(3) 0.086(5) 0.049(4) 0.000(3) -0.007(3) 0.016(3) 
C1C 0.032(3) 0.024(3) 0.026(2) 0.000(2) 0.011(2) 0.001(2) 
O1C 0.036(2) 0.054(3) 0.022(2) -0.007(2) 0.0052(14) 0.008(2) 
C2C 0.024(2) 0.029(3) 0.027(2) 0.003(2) 0.006(2) 0.004(2) 
O2C 0.023(2) 0.061(3) 0.032(2) 0.005(2) 0.0071(14) 0.004(2) 
C3C 0.024(2) 0.024(3) 0.026(2) 0.005(2) 0.009(2) -0.001(2) 
O3C 0.026(2) 0.036(2) 0.021(2) 0.0048(13) 0.0094(12) -0.0018(14) 
C4C 0.022(2) 0.023(2) 0.019(2) 0.000(2) 0.007(2) -0.003(2) 
C5C 0.022(2) 0.024(2) 0.024(2) -0.001(2) 0.008(2) 0.001(2) 
C6C 0.034(3) 0.029(3) 0.019(2) 0.002(2) 0.011(2) 0.001(2) 
C7C 0.024(2) 0.037(3) 0.024(2) 0.000(2) 0.001(2) -0.001(2) 
C8C 0.022(2) 0.028(3) 0.030(2) 0.000(2) 0.009(2) 0.000(2) 
C9C 0.026(2) 0.035(3) 0.025(2) 0.001(2) 0.013(2) -0.001(2) 
C10C 0.025(2) 0.030(3) 0.021(2) 0.001(2) 0.006(2) -0.003(2) 
O11C 0.024(2) 0.053(3) 0.031(2) -0.008(2) 0.0122(14) -0.004(2) 
C12C 0.026(5) 0.054(8) 0.034(5) -0.003(5) 0.012(4) -0.001(5) 
C12" 0.029(5) 0.052(7) 0.032(5) -0.008(5) 0.012(4) 0.002(5) 
C1D 0.040(3) 0.021(3) 0.022(2) 0.000(2) 0.003(2) 0.004(2) 
O1D 0.032(2) 0.039(2) 0.017(2) -0.0004(13) 0.0019(13) 0.009(2) 
C2D 0.042(3) 0.020(3) 0.018(2) 0.000(2) 0.005(2) 0.000(2) 
O2D 0.037(2) 0.041(2) 0.022(2) 0.0042(14) 0.0072(14) -0.005(2) 
C3D 0.042(3) 0.021(3) 0.027(2) 0.000(2) 0.009(2) -0.002(2) 
O3D 0.043(2) 0.043(2) 0.016(2) -0.0004(14) 0.0048(14) 0.001(2) 
C4D 0.038(3) 0.020(2) 0.019(2) -0.001(2) 0.003(2) 0.001(2) 
C5D 0.034(3) 0.023(3) 0.022(2) -0.004(2) 0.001(2) 0.000(2) 
C6D 0.035(3) 0.040(3) 0.024(2) 0.001(2) 0.002(2) 0.003(2) 
C7D 0.045(3) 0.049(4) 0.026(3) 0.000(2) 0.000(2) 0.005(3) 
C8D 0.035(3) 0.039(3) 0.046(3) 0.002(3) 0.004(2) 0.006(3) 
C9D 0.046(3) 0.043(3) 0.033(3) 0.002(2) 0.012(2) 0.004(3) 
C10D 0.038(3) 0.036(3) 0.024(2) 0.000(2) 0.004(2) 0.001(2) 
O11D 0.037(2) 0.077(3) 0.057(3) 0.002(2) 0.002(2) 0.014(2) 
C12D 0.045(4) 0.091(6) 0.081(5) -0.003(4) 0.017(4) 0.013(4) 
C1E 0.044(3) 0.029(3) 0.011(2) -0.001(2) 0.005(2) 0.006(2) 
O1E 0.058(2) 0.030(2) 0.026(2) 0.0040(14) 0.011(2) 0.023(2) 
C2E 0.040(3) 0.017(2) 0.020(2) 0.000(2) 0.009(2) -0.002(2) 
O2E 0.058(2) 0.030(2) 0.042(2) -0.001(2) 0.020(2) -0.011(2) 
C3E 0.030(2) 0.021(2) 0.020(2) -0.001(2) 0.006(2) -0.002(2) 
O3E 0.022(2) 0.023(2) 0.031(2) 0.0016(13) 0.0093(13) 0.0016(14) 
C4E 0.026(2) 0.025(3) 0.018(2) -0.002(2) 0.002(2) 0.006(2) 
C5E 0.027(2) 0.035(3) 0.022(2) -0.004(2) 0.007(2) 0.005(2) 
C6E 0.023(2) 0.037(3) 0.023(2) 0.004(2) 0.005(2) 0.000(2) 
C7E 0.035(3) 0.041(3) 0.026(2) 0.007(2) 0.002(2) -0.009(2) 
C8E 0.024(3) 0.073(4) 0.030(3) 0.015(3) 0.001(2) -0.013(3) 
C9E 0.022(3) 0.079(5) 0.037(3) 0.003(3) 0.009(2) 0.011(3) 
C10E 0.030(3) 0.057(4) 0.036(3) -0.012(3) 0.005(2) 0.018(3) 
O11E 0.038(3) 0.161(6) 0.080(3) 0.069(4) -0.025(2) -0.052(3) 
C12E 0.031(6) 0.084(11) 0.053(7) -0.013(7) 0.007(5) 0.000(7) 
C12* 0.021(5) 0.039(7) 0.043(6) 0.002(5) -0.003(4) 0.000(5) 
C1F 0.021(2) 0.022(2) 0.021(2) -0.002(2) 0.004(2) 0.001(2) 
O1F 0.020(2) 0.038(2) 0.0194(15) 0.0037(13) 0.0031(12) -0.0007(14) 
C2F 0.024(2) 0.030(3) 0.019(2) 0.000(2) 0.004(2) 0.001(2) 
O2F 0.022(2) 0.065(3) 0.022(2) -0.001(2) 0.0078(13) 0.003(2) 
C3F 0.020(2) 0.019(2) 0.025(2) -0.002(2) 0.008(2) 0.005(2) 
O3F 0.026(2) 0.029(2) 0.0200(15) -0.0027(13) 0.0058(12) 0.0037(14) 
C4F 0.017(2) 0.019(2) 0.020(2) -0.003(2) 0.003(2) 0.001(2) 
C5F 0.019(2) 0.019(2) 0.022(2) 0.000(2) 0.007(2) 0.001(2) 
C6F 0.027(2) 0.029(3) 0.019(2) -0.003(2) 0.007(2) 0.000(2) 
C7F 0.025(2) 0.029(3) 0.021(2) 0.000(2) 0.003(2) -0.001(2) 
C8F 0.020(2) 0.025(3) 0.028(2) 0.000(2) 0.010(2) -0.001(2) 
C9F 0.023(2) 0.039(3) 0.023(2) 0.002(2) 0.009(2) 0.000(2) 
C10F 0.023(2) 0.031(3) 0.022(2) 0.003(2) 0.006(2) 0.002(2) 
O11F 0.020(2) 0.054(2) 0.027(2) 0.000(2) 0.0101(13) -0.003(2) 
C12F 0.035(3) 0.051(4) 0.032(3) 0.000(2) 0.017(2) -0.006(3) 
O21 0.051(2) 0.032(2) 0.036(2) 0.0062(15) 0.018(2) -0.013(2) 
O22 0.028(2) 0.076(3) 0.030(2) 0.004(2) 0.0145(15) 0.003(2) 
O23 0.027(2) 0.057(3) 0.029(2) 0.004(2) 0.0101(14) 0.009(2) 
O24 0.041(2) 0.032(2) 0.030(2) -0.0096(14) 0.0152(14) -0.009(2) 
O31 0.031(2) 0.027(2) 0.027(2) -0.0042(13) 0.0124(13) 0.0023(14) 
O32 0.036(2) 0.045(2) 0.021(2) 0.0037(14) 0.0062(14) -0.008(2) 
O33 0.019(2) 0.063(3) 0.019(2) -0.0082(15) 0.0035(12) 0.003(2) 
O34 0.036(2) 0.032(2) 0.021(2) 0.0039(13) 0.0051(13) 0.011(2) 
O40 0.036(4) 0.048(5) 0.044(4) -0.005(3) 0.014(3) 0.014(4) 
O50 0.028(3) 0.031(4) 0.025(3) 0.000(3) 0.009(3) -0.001(3) 
O51 0.024(3) 0.030(4) 0.022(3) 0.001(3) 0.008(3) 0.001(3) 
O60 0.036(6) 0.015(8) 0.035(7) 0.009(6) 0.003(4) 0.001(6) 
O70 0.049(4) 0.089(6) 0.088(6) -0.024(5) -0.018(4) 0.038(4) 
  
_geom_special_details 
; 
 All esds (except the esd in the dihedral angle between two l.s. planes) 
 are estimated using the full covariance matrix.  The cell esds are taken 
 into account individually in the estimation of esds in distances, angles 
 and torsion angles; correlations between esds in cell parameters are only 
 used when they are defined by crystal symmetry.  An approximate (isotropic) 
 treatment of cell esds is used for estimating esds involving l.s. planes. 
; 
  
loop_ 
 _geom_bond_atom_site_label_1 
 _geom_bond_atom_site_label_2 
 _geom_bond_distance 
 _geom_bond_site_symmetry_2 
 _geom_bond_publ_flag 
Eu1 O1B 2.343(3) . ? 
Eu1 O1A 2.349(3) . ? 
Eu1 O3E 2.352(3) 1_565 ? 
Eu1 O3C 2.391(3) . ? 
Eu1 O22 2.439(3) . ? 
Eu1 O23 2.445(3) . ? 
Eu1 O24 2.450(3) . ? 
Eu1 O21 2.458(3) . ? 
Eu2 O1E 2.351(3) . ? 
Eu2 O3B 2.367(3) . ? 
Eu2 O3F 2.370(3) . ? 
Eu2 O1D 2.375(3) . ? 
Eu2 O31 2.419(3) . ? 
Eu2 O34 2.449(3) . ? 
Eu2 O32 2.453(3) . ? 
Eu2 O33 2.479(3) . ? 
C1A O1A 1.271(5) . ? 
C1A C4A 1.412(6) . ? 
C1A C2A 1.478(7) . ? 
C2A O2A 1.230(6) . ? 
C2A C3A 1.506(6) . ? 
C3A O3A 1.224(5) . ? 
C3A C4A 1.456(6) . ? 
C4A C5A 1.431(7) . ? 
C5A C10A 1.402(6) . ? 
C5A C6A 1.414(6) . ? 
C6A C7A 1.366(7) . ? 
C7A C8A 1.393(7) . ? 
C8A O11A 1.354(6) . ? 
C8A C9A 1.399(7) . ? 
C9A C10A 1.377(7) . ? 
O11A C12' 1.395(7) . ? 
O11A C12A 1.400(7) . ? 
C1B O1B 1.244(5) . ? 
C1B C4B 1.426(7) . ? 
C1B C2B 1.499(6) . ? 
C2B O2B 1.219(5) . ? 
C2B C3B 1.496(6) . ? 
C3B O3B 1.251(5) . ? 
C3B C4B 1.426(6) . ? 
C4B C5B 1.463(6) . ? 
C5B C6B 1.383(7) . ? 
C5B C10B 1.402(7) . ? 
C6B C7B 1.380(7) . ? 
C7B C8B 1.393(8) . ? 
C8B C9B 1.376(8) . ? 
C8B O11B 1.383(6) . ? 
C9B C10B 1.390(7) . ? 
O11B C12B 1.475(7) . ? 
C1C O1C 1.232(5) . ? 
C1C C4C 1.454(6) . ? 
C1C C2C 1.504(6) . ? 
C2C O2C 1.223(5) . ? 
C2C C3C 1.498(6) . ? 
C3C O3C 1.248(5) . ? 
C3C C4C 1.438(6) . ? 
C4C C5C 1.433(6) . ? 
C5C C10C 1.405(6) . ? 
C5C C6C 1.408(6) . ? 
C6C C7C 1.365(6) . ? 
C7C C8C 1.392(7) . ? 
C8C O11C 1.362(5) . ? 
C8C C9C 1.384(6) . ? 
C9C C10C 1.379(6) . ? 
O11C C12C 1.416(7) . ? 
O11C C12" 1.445(7) . ? 
C1D O1D 1.268(5) . ? 
C1D C4D 1.426(6) . ? 
C1D C2D 1.494(7) . ? 
C2D O2D 1.230(6) . ? 
C2D C3D 1.511(6) . ? 
C3D O3D 1.234(5) . ? 
C3D C4D 1.455(7) . ? 
C4D C5D 1.433(7) . ? 
C5D C10D 1.378(7) . ? 
C5D C6D 1.411(6) . ? 
C6D C7D 1.365(7) . ? 
C7D C8D 1.408(8) . ? 
C8D O11D 1.367(6) . ? 
C8D C9D 1.397(7) . ? 
C9D C10D 1.381(7) . ? 
O11D C12D 1.440(8) . ? 
C1E O1E 1.252(6) . ? 
C1E C4E 1.426(7) . ? 
C1E C2E 1.504(7) . ? 
C2E O2E 1.213(6) . ? 
C2E C3E 1.503(6) . ? 
C3E O3E 1.242(5) . ? 
C3E C4E 1.423(6) . ? 
O3E Eu1 2.352(3) 1_545 ? 
C4E C5E 1.455(7) . ? 
C5E C6E 1.365(7) . ? 
C5E C10E 1.400(7) . ? 
C6E C7E 1.381(7) . ? 
C7E C8E 1.397(8) . ? 
C8E O11E 1.338(7) . ? 
C8E C9E 1.387(9) . ? 
C9E C10E 1.384(8) . ? 
O11E C12E 1.328(8) . ? 
O11E C12* 1.366(7) . ? 
C1F O1F 1.246(5) . ? 
C1F C4F 1.452(6) . ? 
C1F C2F 1.500(6) . ? 
C2F O2F 1.221(5) . ? 
C2F C3F 1.488(6) . ? 
C3F O3F 1.251(5) . ? 
C3F C4F 1.424(6) . ? 
C4F C5F 1.437(6) . ? 
C5F C10F 1.403(6) . ? 
C5F C6F 1.406(6) . ? 
C6F C7F 1.378(6) . ? 
C7F C8F 1.397(6) . ? 
C8F O11F 1.368(5) . ? 
C8F C9F 1.383(6) . ? 
C9F C10F 1.391(6) . ? 
O11F C12F 1.429(6) . ? 
O61 O62 0.80(3) . ? 
O70 O71 0.79(3) . ? 
O80 O81 1.35(3) . ? 
O81 O83 1.46(3) . ? 
O81 O83 1.57(3) 2_656 ? 
O81 O82 1.74(3) . ? 
O82 O83 1.08(2) . ? 
O83 O81 1.57(3) 2_656 ? 
O90 O91 1.29(2) . ? 
O91 O92 1.05(2) . ? 
O92 O93 1.65(4) . ? 
O93 O93 1.33(7) 2_656 ? 
  
loop_ 
 _geom_angle_atom_site_label_1 
 _geom_angle_atom_site_label_2 
 _geom_angle_atom_site_label_3 
 _geom_angle 
 _geom_angle_site_symmetry_1 
 _geom_angle_site_symmetry_3 
 _geom_angle_publ_flag 
O1B Eu1 O1A 73.12(11) . . ? 
O1B Eu1 O3E 101.93(11) . 1_565 ? 
O1A Eu1 O3E 76.39(11) . 1_565 ? 
O1B Eu1 O3C 73.14(11) . . ? 
O1A Eu1 O3C 128.36(11) . . ? 
O3E Eu1 O3C 73.74(10) 1_565 . ? 
O1B Eu1 O22 90.73(12) . . ? 
O1A Eu1 O22 75.57(11) . . ? 
O3E Eu1 O22 144.21(11) 1_565 . ? 
O3C Eu1 O22 141.96(11) . . ? 
O1B Eu1 O23 81.29(12) . . ? 
O1A Eu1 O23 134.46(11) . . ? 
O3E Eu1 O23 146.90(10) 1_565 . ? 
O3C Eu1 O23 75.87(11) . . ? 
O22 Eu1 O23 67.62(11) . . ? 
O1B Eu1 O24 141.20(11) . . ? 
O1A Eu1 O24 143.90(12) . . ? 
O3E Eu1 O24 83.42(11) 1_565 . ? 
O3C Eu1 O24 71.67(11) . . ? 
O22 Eu1 O24 107.30(12) . . ? 
O23 Eu1 O24 74.80(12) . . ? 
O1B Eu1 O21 149.69(11) . . ? 
O1A Eu1 O21 77.39(11) . . ? 
O3E Eu1 O21 77.40(12) 1_565 . ? 
O3C Eu1 O21 133.23(11) . . ? 
O22 Eu1 O21 75.14(13) . . ? 
O23 Eu1 O21 116.01(12) . . ? 
O24 Eu1 O21 69.11(11) . . ? 
O1E Eu2 O3B 101.81(12) . . ? 
O1E Eu2 O3F 70.48(11) . . ? 
O3B Eu2 O3F 80.73(10) . . ? 
O1E Eu2 O1D 74.56(11) . . ? 
O3B Eu2 O1D 73.20(11) . . ? 
O3F Eu2 O1D 130.43(11) . . ? 
O1E Eu2 O31 148.62(10) . . ? 
O3B Eu2 O31 88.67(11) . . ? 
O3F Eu2 O31 140.84(10) . . ? 
O1D Eu2 O31 80.52(11) . . ? 
O1E Eu2 O34 143.00(11) . . ? 
O3B Eu2 O34 73.22(10) . . ? 
O3F Eu2 O34 72.55(10) . . ? 
O1D Eu2 O34 134.07(11) . . ? 
O31 Eu2 O34 68.30(10) . . ? 
O1E Eu2 O32 80.35(12) . . ? 
O3B Eu2 O32 146.21(10) . . ? 
O3F Eu2 O32 129.98(11) . . ? 
O1D Eu2 O32 75.03(11) . . ? 
O31 Eu2 O32 74.97(11) . . ? 
O34 Eu2 O32 124.41(11) . . ? 
O1E Eu2 O33 98.14(13) . . ? 
O3B Eu2 O33 143.87(10) . . ? 
O3F Eu2 O33 77.98(10) . . ? 
O1D Eu2 O33 141.81(11) . . ? 
O31 Eu2 O33 89.72(11) . . ? 
O34 Eu2 O33 72.70(11) . . ? 
O32 Eu2 O33 66.78(10) . . ? 
O1A C1A C4A 135.4(5) . . ? 
O1A C1A C2A 133.5(4) . . ? 
C4A C1A C2A 91.1(4) . . ? 
C1A O1A Eu1 151.0(3) . . ? 
O2A C2A C1A 135.8(4) . . ? 
O2A C2A C3A 136.2(4) . . ? 
C1A C2A C3A 88.0(4) . . ? 
O3A C3A C4A 136.1(4) . . ? 
O3A C3A C2A 135.7(5) . . ? 
C4A C3A C2A 88.3(3) . . ? 
C1A C4A C5A 134.3(4) . . ? 
C1A C4A C3A 92.6(4) . . ? 
C5A C4A C3A 133.1(4) . . ? 
C10A C5A C6A 117.9(4) . . ? 
C10A C5A C4A 122.2(4) . . ? 
C6A C5A C4A 119.9(4) . . ? 
C7A C6A C5A 121.3(4) . . ? 
C6A C7A C8A 120.1(4) . . ? 
O11A C8A C7A 119.9(4) . . ? 
O11A C8A C9A 120.4(4) . . ? 
C7A C8A C9A 119.7(5) . . ? 
C10A C9A C8A 120.0(5) . . ? 
C9A C10A C5A 120.9(4) . . ? 
C8A O11A C12' 124.7(6) . . ? 
C8A O11A C12A 121.8(6) . . ? 
O1B C1B C4B 133.9(5) . . ? 
O1B C1B C2B 136.1(5) . . ? 
C4B C1B C2B 90.1(4) . . ? 
C1B O1B Eu1 152.5(3) . . ? 
O2B C2B C3B 135.6(4) . . ? 
O2B C2B C1B 137.1(5) . . ? 
C3B C2B C1B 87.0(3) . . ? 
O3B C3B C4B 135.1(4) . . ? 
O3B C3B C2B 134.7(4) . . ? 
C4B C3B C2B 90.2(4) . . ? 
C3B O3B Eu2 139.9(3) . . ? 
C1B C4B C3B 92.6(4) . . ? 
C1B C4B C5B 132.6(4) . . ? 
C3B C4B C5B 134.6(4) . . ? 
C6B C5B C10B 119.8(5) . . ? 
C6B C5B C4B 120.3(4) . . ? 
C10B C5B C4B 119.8(4) . . ? 
C7B C6B C5B 120.7(5) . . ? 
C6B C7B C8B 118.9(5) . . ? 
C9B C8B O11B 123.6(5) . . ? 
C9B C8B C7B 121.6(5) . . ? 
O11B C8B C7B 114.8(5) . . ? 
C8B C9B C10B 119.1(5) . . ? 
C9B C10B C5B 119.9(5) . . ? 
C8B O11B C12B 116.5(5) . . ? 
O1C C1C C4C 137.7(4) . . ? 
O1C C1C C2C 132.5(4) . . ? 
C4C C1C C2C 89.9(3) . . ? 
O2C C2C C3C 135.9(4) . . ? 
O2C C2C C1C 136.5(4) . . ? 
C3C C2C C1C 87.6(4) . . ? 
O3C C3C C4C 135.3(4) . . ? 
O3C C3C C2C 134.0(4) . . ? 
C4C C3C C2C 90.7(3) . . ? 
C3C O3C Eu1 137.8(3) . . ? 
C5C C4C C3C 132.4(4) . . ? 
C5C C4C C1C 135.8(4) . . ? 
C3C C4C C1C 91.9(4) . . ? 
C10C C5C C6C 118.3(4) . . ? 
C10C C5C C4C 121.7(4) . . ? 
C6C C5C C4C 120.0(4) . . ? 
C7C C6C C5C 120.6(4) . . ? 
C6C C7C C8C 120.2(4) . . ? 
O11C C8C C9C 119.6(4) . . ? 
O11C C8C C7C 119.8(4) . . ? 
C9C C8C C7C 120.6(4) . . ? 
C10C C9C C8C 119.4(4) . . ? 
C9C C10C C5C 120.9(4) . . ? 
C8C O11C C12C 118.7(5) . . ? 
C8C O11C C12" 122.8(5) . . ? 
O1D C1D C4D 135.4(5) . . ? 
O1D C1D C2D 133.3(4) . . ? 
C4D C1D C2D 91.3(4) . . ? 
C1D O1D Eu2 150.5(3) . . ? 
O2D C2D C1D 135.5(4) . . ? 
O2D C2D C3D 137.3(4) . . ? 
C1D C2D C3D 87.2(4) . . ? 
O3D C3D C4D 136.0(5) . . ? 
O3D C3D C2D 134.5(5) . . ? 
C4D C3D C2D 89.5(4) . . ? 
C1D C4D C5D 134.0(4) . . ? 
C1D C4D C3D 91.9(4) . . ? 
C5D C4D C3D 134.1(4) . . ? 
C10D C5D C6D 118.7(5) . . ? 
C10D C5D C4D 121.4(4) . . ? 
C6D C5D C4D 119.9(4) . . ? 
C7D C6D C5D 120.8(5) . . ? 
C6D C7D C8D 119.8(5) . . ? 
O11D C8D C9D 124.8(5) . . ? 
O11D C8D C7D 115.2(5) . . ? 
C9D C8D C7D 119.9(5) . . ? 
C10D C9D C8D 119.1(5) . . ? 
C5D C10D C9D 121.7(5) . . ? 
C8D O11D C12D 117.0(5) . . ? 
O1E C1E C4E 133.2(5) . . ? 
O1E C1E C2E 136.5(5) . . ? 
C4E C1E C2E 90.3(4) . . ? 
C1E O1E Eu2 144.5(4) . . ? 
O2E C2E C3E 136.0(5) . . ? 
O2E C2E C1E 137.2(5) . . ? 
C3E C2E C1E 86.5(4) . . ? 
O3E C3E C4E 134.6(4) . . ? 
O3E C3E C2E 135.0(4) . . ? 
C4E C3E C2E 90.4(4) . . ? 
C3E O3E Eu1 147.7(3) . 1_545 ? 
C3E C4E C1E 92.6(4) . . ? 
C3E C4E C5E 132.6(4) . . ? 
C1E C4E C5E 134.6(4) . . ? 
C6E C5E C10E 120.4(5) . . ? 
C6E C5E C4E 119.9(4) . . ? 
C10E C5E C4E 119.7(5) . . ? 
C5E C6E C7E 121.0(5) . . ? 
C6E C7E C8E 119.0(5) . . ? 
O11E C8E C9E 119.0(6) . . ? 
O11E C8E C7E 120.7(6) . . ? 
C9E C8E C7E 120.3(5) . . ? 
C10E C9E C8E 120.0(5) . . ? 
C9E C10E C5E 119.2(6) . . ? 
C12E O11E C8E 128.6(7) . . ? 
C8E O11E C12* 128.9(7) . . ? 
O1F C1F C4F 137.0(4) . . ? 
O1F C1F C2F 133.5(4) . . ? 
C4F C1F C2F 89.4(3) . . ? 
O2F C2F C3F 135.8(4) . . ? 
O2F C2F C1F 136.5(4) . . ? 
C3F C2F C1F 87.6(3) . . ? 
O3F C3F C4F 135.2(4) . . ? 
O3F C3F C2F 133.8(4) . . ? 
C4F C3F C2F 91.0(3) . . ? 
C3F O3F Eu2 136.7(3) . . ? 
C3F C4F C5F 133.3(4) . . ? 
C3F C4F C1F 92.0(3) . . ? 
C5F C4F C1F 134.6(4) . . ? 
C10F C5F C6F 118.7(4) . . ? 
C10F C5F C4F 120.7(4) . . ? 
C6F C5F C4F 120.5(4) . . ? 
C7F C6F C5F 120.1(4) . . ? 
C6F C7F C8F 120.4(4) . . ? 
O11F C8F C9F 123.5(4) . . ? 
O11F C8F C7F 115.9(4) . . ? 
C9F C8F C7F 120.6(4) . . ? 
C8F C9F C10F 119.1(4) . . ? 
C9F C10F C5F 121.1(4) . . ? 
C8F O11F C12F 117.5(4) . . ? 
O80 O81 O83 113.8(21) . . ? 
O80 O81 O83 110.0(19) . 2_656 ? 
O83 O81 O83 93.3(18) . 2_656 ? 
O80 O81 O82 75.9(15) . . ? 
O83 O81 O82 38.3(11) . . ? 
O83 O81 O82 101.1(16) 2_656 . ? 
O83 O82 O81 56.5(15) . . ? 
O82 O83 O81 85.1(19) . . ? 
O82 O83 O81 86.1(19) . 2_656 ? 
O81 O83 O81 83.9(18) . 2_656 ? 
O92 O91 O90 105.2(15) . . ? 
O91 O92 O93 150.6(19) . . ? 
O93 O93 O92 125.1(24) 2_656 . ? 
  
_refine_diff_density_max    1.709 
_refine_diff_density_min   -1.313 
_refine_diff_density_rms    0.129 
  
#===END

 
data_Compound 3
  
_audit_creation_method            SHELXL 
_chemical_name_systematic 
; 
 ? 
; 
_chemical_name_common             ? 
_chemical_formula_moiety          ? 
_chemical_formula_structural      ? 
_chemical_formula_analytical      ? 
_chemical_formula_sum             'C33 H34.50 O18.75 Gd'
_chemical_formula_weight          888.36
_chemical_melting_point           ? 
_chemical_compound_source         ? 
  
loop_ 
 _atom_type_symbol 
 _atom_type_description 
 _atom_type_scat_dispersion_real 
 _atom_type_scat_dispersion_imag 
 _atom_type_scat_source 
 'C'  'C'   0.0033   0.0016 
 'International Tables Vol C Tables 4.2.6.8 and 6.1.1.4' 
 'H'  'H'   0.0000   0.0000 
 'International Tables Vol C Tables 4.2.6.8 and 6.1.1.4' 
 'O'  'O'   0.0106   0.0060 
 'International Tables Vol C Tables 4.2.6.8 and 6.1.1.4' 
 'Gd'  'Gd'  -0.1653   3.9035 
 'International Tables Vol C Tables 4.2.6.8 and 6.1.1.4' 
  
_symmetry_cell_setting            Monoclinic 
_symmetry_space_group_name_H-M    P2/c 
  
loop_ 
 _symmetry_equiv_pos_as_xyz 
 'x, y, z' 
 '-x, y, -z+1/2' 
 '-x, -y, -z' 
 'x, -y, z-1/2' 
  
_cell_length_a                    27.9313(5) 
_cell_length_b                    13.5738(3) 
_cell_length_c                    19.5825(3) 
_cell_angle_alpha                 90.00 
_cell_angle_beta                  108.6525(9) 
_cell_angle_gamma                 90.00 
_cell_volume                      7034.4(2) 
_cell_formula_units_Z             8 
_cell_measurement_temperature     150(2) 
_cell_measurement_reflns_used     ? 
_cell_measurement_theta_min       ? 
_cell_measurement_theta_max       ? 
  
_exptl_crystal_description        prisms 
_exptl_crystal_colour             Colourless 
_exptl_crystal_size_max           0.12 
_exptl_crystal_size_mid           0.08 
_exptl_crystal_size_min           0.06 
_exptl_crystal_density_meas       ? 
_exptl_crystal_density_diffrn     1.678 
_exptl_crystal_density_method     ? 
_exptl_crystal_F_000              3572 
_exptl_absorpt_coefficient_mu     1.969 
_exptl_absorpt_correction_type    Empirical 
_exptl_absorpt_correction_T_min   0.7981 
_exptl_absorpt_correction_T_max   0.8910 
  
_exptl_special_details 
; 
 ? 
; 
  
_diffrn_ambient_temperature       150(2) 
_diffrn_radiation_wavelength      0.71073 
_diffrn_radiation_type            MoK\a 
_diffrn_radiation_source          'fine-focus sealed tube' 
_diffrn_radiation_monochromator   graphite 
_diffrn_measurement_device        'Nonius Kappa CCD' 
_diffrn_measurement_method        '\w scans' 
_diffrn_standards_number          ? 
_diffrn_standards_interval_count  ? 
_diffrn_standards_interval_time   ? 
_diffrn_standards_decay_%         ? 
_diffrn_reflns_number             47510 
_diffrn_reflns_av_R_equivalents   0.0844 
_diffrn_reflns_av_sigmaI/netI     0.0972 
_diffrn_reflns_limit_h_min        -35 
_diffrn_reflns_limit_h_max        36 
_diffrn_reflns_limit_k_min        -17 
_diffrn_reflns_limit_k_max        16 
_diffrn_reflns_limit_l_min        -25 
_diffrn_reflns_limit_l_max        25 
_diffrn_reflns_theta_min          2.55 
_diffrn_reflns_theta_max          27.50 
_reflns_number_total              16084 
_reflns_number_observed           9684 
_reflns_observed_criterion        >2sigma(I) 
  
_computing_data_collection        ? 
_computing_cell_refinement        ? 
_computing_data_reduction         'Siemens SHELXTL' 
_computing_structure_solution     'SHELXS-86 (Sheldrick, 1990)' 
_computing_structure_refinement   'SHELXL-93 (Sheldrick, 1993)' 
_computing_molecular_graphics     'Siemens SHELXTL' 
_computing_publication_material   'Siemens SHELXTL' 
  
_refine_special_details 
; 
 Refinement on F^2^ for ALL reflections except for 1837 with very negative F^2^ 
 or flagged by the user for potential systematic errors.  Weighted R-factors 
 wR and all goodnesses of fit S are based on F^2^, conventional R-factors R 
 are based on F, with F set to zero for negative F^2^. The observed criterion 
 of F^2^ > 2sigma(F^2^) is used only for calculating _R_factor_obs etc. and is 
 not relevant to the choice of reflections for refinement.  R-factors based 
 on F^2^ are statistically about twice as large as those based on F, and R- 
 factors based on ALL data will be even larger. 
; 
  
_refine_ls_structure_factor_coef  Fsqd 
_refine_ls_matrix_type            full 
_refine_ls_weighting_scheme 
 'calc w=1/[\s^2^(Fo^2^)+(0.0000P)^2^+45.8763P] where P=(Fo^2^+2Fc^2^)/3' 
_atom_sites_solution_primary      direct 
_atom_sites_solution_secondary    difmap 
_atom_sites_solution_hydrogens    geom 
_refine_ls_hydrogen_treatment     ? 
_refine_ls_extinction_method      SHELXL 
_refine_ls_extinction_coef        0.00036(4) 
_refine_ls_extinction_expression 
 'Fc^*^=kFc[1+0.001xFc^2^\l^3^/sin(2\q)]^-1/4^' 
_refine_ls_number_reflns          14247 
_refine_ls_number_parameters      1018 
_refine_ls_number_restraints      33 
_refine_ls_R_factor_all           0.1262 
_refine_ls_R_factor_obs           0.0649 
_refine_ls_wR_factor_all          0.1473 
_refine_ls_wR_factor_obs          0.1264 
_refine_ls_goodness_of_fit_all    1.175 
_refine_ls_goodness_of_fit_obs    1.344 
_refine_ls_restrained_S_all       1.196 
_refine_ls_restrained_S_obs       1.350 
_refine_ls_shift/esd_max          -0.002 
_refine_ls_shift/esd_mean         0.000 
  
loop_ 
 _atom_site_label 
 _atom_site_type_symbol 
 _atom_site_fract_x 
 _atom_site_fract_y 
 _atom_site_fract_z 
 _atom_site_U_iso_or_equiv 
 _atom_site_thermal_displace_type 
 _atom_site_occupancy 
 _atom_site_calc_flag 
 _atom_site_refinement_flags 
 _atom_site_disorder_group 
Gd1 Gd 0.345025(14) 1.40861(3) 0.29947(2) 0.03112(12) Uani 1 d . . 
Gd2 Gd 0.149287(15) 0.91013(3) 0.24417(2) 0.03242(12) Uani 1 d . . 
C1A C 0.3021(3) 1.3909(6) 0.1119(4) 0.031(2) Uani 1 d . . 
O1A O 0.3019(2) 1.3957(5) 0.1758(3) 0.0417(14) Uani 1 d . . 
C2A C 0.3418(3) 1.3997(7) 0.0763(4) 0.039(2) Uani 1 d . . 
O2A O 0.3884(2) 1.4067(5) 0.0977(3) 0.0465(15) Uani 1 d . . 
C3A C 0.3016(3) 1.3914(6) 0.0058(4) 0.039(2) Uani 1 d . . 
O3A O 0.3000(2) 1.3955(5) -0.0584(3) 0.045(2) Uani 1 d . . 
C4A C 0.2648(3) 1.3802(6) 0.0424(4) 0.039(2) Uani 1 d . . 
C5A C 0.2108(3) 1.3671(6) 0.0193(4) 0.037(2) Uani 1 d . . 
C6A C 0.1835(3) 1.3599(7) -0.0549(4) 0.041(2) Uani 1 d . . 
H6AA H 0.2014(3) 1.3630(7) -0.0888(4) 0.050 Uiso 1 calc R . 
C7A C 0.1320(3) 1.3487(6) -0.0796(5) 0.042(2) Uani 1 d . . 
H7AA H 0.1145(3) 1.3447(6) -0.1298(5) 0.051 Uiso 1 calc R . 
C8A C 0.1058(3) 1.3434(7) -0.0303(5) 0.042(2) Uani 1 d D . 
C9A C 0.1318(4) 1.3473(7) 0.0435(5) 0.047(2) Uani 1 d . . 
H9AA H 0.1139(4) 1.3415(7) 0.0772(5) 0.056 Uiso 1 calc R . 
C10A C 0.1835(4) 1.3595(7) 0.0673(5) 0.045(2) Uani 1 d . . 
H10A H 0.2009(4) 1.3629(7) 0.1176(5) 0.054 Uiso 1 calc R . 
O11A O 0.0552(2) 1.3324(6) -0.0547(4) 0.065(2) Uani 1 d D . 
C12A C 0.0246(6) 1.3589(14) -0.0117(9) 0.052(5) Uani 0.50 d PD 1 
H12A H -0.0110(6) 1.3456(14) -0.0386(9) 0.078 Uiso 0.50 calc PR 1 
H12B H 0.0289(6) 1.4291(14) 0.0002(9) 0.078 Uiso 0.50 calc PR 1 
H12C H 0.0347(6) 1.3200(14) 0.0328(9) 0.078 Uiso 0.50 calc PR 1 
C12' C 0.0256(6) 1.3113(16) -0.1271(7) 0.066(6) Uani 0.50 d PD 2 
H12D H -0.0101(6) 1.3070(16) -0.1304(7) 0.099 Uiso 0.50 calc PR 2 
H12E H 0.0365(6) 1.2484(16) -0.1418(7) 0.099 Uiso 0.50 calc PR 2 
H12F H 0.0301(6) 1.3638(16) -0.1588(7) 0.099 Uiso 0.50 calc PR 2 
C1B C 0.2989(3) 1.1675(7) 0.2709(4) 0.038(2) Uani 1 d . . 
O1B O 0.3259(2) 1.2427(4) 0.2755(3) 0.0430(15) Uani 1 d . . 
C2B C 0.2450(3) 1.1483(7) 0.2641(4) 0.036(2) Uani 1 d . . 
O2B O 0.2081(2) 1.1963(4) 0.2666(3) 0.0426(15) Uani 1 d . . 
C3B C 0.2568(3) 1.0407(6) 0.2602(4) 0.036(2) Uani 1 d . . 
O3B O 0.2311(2) 0.9634(4) 0.2528(3) 0.0382(14) Uani 1 d . . 
C4B C 0.3090(3) 1.0638(6) 0.2708(4) 0.033(2) Uani 1 d . . 
C5B C 0.3538(3) 1.0078(7) 0.2832(4) 0.037(2) Uani 1 d . . 
C6B C 0.3523(3) 0.9021(7) 0.2825(4) 0.042(2) Uani 1 d . . 
H6BA H 0.3209(3) 0.8684(7) 0.2715(4) 0.050 Uiso 1 calc R . 
C7B C 0.3963(3) 0.8505(7) 0.2976(5) 0.045(2) Uani 1 d . . 
H7BA H 0.3950(3) 0.7806(7) 0.2952(5) 0.054 Uiso 1 calc R . 
C8B C 0.4428(4) 0.8968(8) 0.3163(5) 0.051(2) Uani 1 d . . 
C9B C 0.4451(4) 0.9983(7) 0.3180(5) 0.049(2) Uani 1 d . . 
H9BA H 0.4769(4) 1.0309(7) 0.3308(5) 0.059 Uiso 1 calc R . 
C10B C 0.4009(3) 1.0523(7) 0.3010(4) 0.047(2) Uani 1 d . . 
H10B H 0.4028(3) 1.1222(7) 0.3015(4) 0.056 Uiso 1 calc R . 
O11B O 0.4838(3) 0.8362(6) 0.3300(4) 0.068(2) Uani 1 d . . 
C12B C 0.5321(4) 0.8803(9) 0.3568(6) 0.068(3) Uani 1 d . . 
H12A H 0.5582(4) 0.8294(9) 0.3645(6) 0.101 Uiso 1 calc R . 
H12B H 0.5355(4) 0.9133(9) 0.4026(6) 0.101 Uiso 1 calc R . 
H12C H 0.5362(4) 0.9287(9) 0.3219(6) 0.101 Uiso 1 calc R . 
C1C C 0.3606(3) 1.3558(6) 0.5767(4) 0.036(2) Uani 1 d . . 
O1C O 0.3755(2) 1.3592(5) 0.6426(3) 0.047(2) Uani 1 d . . 
C2C C 0.3866(3) 1.3442(6) 0.5216(4) 0.036(2) Uani 1 d . . 
O2C O 0.4302(2) 1.3315(5) 0.5219(3) 0.051(2) Uani 1 d . . 
C3C C 0.3361(3) 1.3511(6) 0.4647(4) 0.036(2) Uani 1 d . . 
O3C O 0.3208(2) 1.3456(4) 0.3967(3) 0.0381(14) Uani 1 d . . 
C4C C 0.3122(3) 1.3625(6) 0.5194(4) 0.033(2) Uani 1 d . . 
C5C C 0.2607(3) 1.3730(6) 0.5152(4) 0.033(2) Uani 1 d . . 
C6C C 0.2227(3) 1.3765(6) 0.4485(4) 0.041(2) Uani 1 d . . 
H6CA H 0.2316(3) 1.3742(6) 0.4056(4) 0.049 Uiso 1 calc R . 
C7C C 0.1720(3) 1.3833(6) 0.4434(4) 0.040(2) Uani 1 d . . 
H7CA H 0.1466(3) 1.3851(6) 0.3975(4) 0.048 Uiso 1 calc R . 
C8C C 0.1590(3) 1.3874(6) 0.5052(4) 0.038(2) Uani 1 d D . 
C9C C 0.1958(3) 1.3850(6) 0.5726(4) 0.039(2) Uani 1 d . . 
H9CA H 0.1863(3) 1.3885(6) 0.6150(4) 0.047 Uiso 1 calc R . 
C10C C 0.2456(3) 1.3777(6) 0.5777(4) 0.036(2) Uani 1 d . . 
H10C H 0.2705(3) 1.3758(6) 0.6239(4) 0.043 Uiso 1 calc R . 
O11C O 0.1091(2) 1.3929(5) 0.5008(3) 0.044(2) Uani 1 d D . 
C12C C 0.0721(5) 1.3929(13) 0.4306(6) 0.041(4) Uani 0.50 d PD 1 
H12G H 0.0382(5) 1.3970(13) 0.4351(6) 0.061 Uiso 0.50 calc PR 1 
H12H H 0.0750(5) 1.3320(13) 0.4054(6) 0.061 Uiso 0.50 calc PR 1 
H12I H 0.0777(5) 1.4496(13) 0.4032(6) 0.061 Uiso 0.50 calc PR 1 
C12" C 0.0927(6) 1.4074(14) 0.5626(7) 0.044(4) Uani 0.50 d PD 2 
H12J H 0.0557(6) 1.4090(14) 0.5473(7) 0.067 Uiso 0.50 calc PR 2 
H12K H 0.1061(6) 1.4699(14) 0.5859(7) 0.067 Uiso 0.50 calc PR 2 
H12L H 0.1051(6) 1.3532(14) 0.5968(7) 0.067 Uiso 0.50 calc PR 2 
C1D C 0.2036(3) 0.8894(6) 0.4329(5) 0.040(2) Uani 1 d . . 
O1D O 0.1994(2) 0.8939(4) 0.3672(3) 0.0427(15) Uani 1 d . . 
C2D C 0.1652(3) 0.8933(6) 0.4726(4) 0.034(2) Uani 1 d . . 
O2D O 0.1192(2) 0.8976(5) 0.4556(3) 0.0457(15) Uani 1 d . . 
C3D C 0.2099(3) 0.8892(6) 0.5417(4) 0.038(2) Uani 1 d . . 
O3D O 0.2142(2) 0.8917(4) 0.6064(3) 0.0442(15) Uani 1 d . . 
C4D C 0.2427(3) 0.8792(6) 0.4982(4) 0.036(2) Uani 1 d . . 
C5D C 0.2966(3) 0.8659(6) 0.5170(4) 0.039(2) Uani 1 d . . 
C6D C 0.3275(4) 0.8674(7) 0.5885(5) 0.047(2) Uani 1 d . . 
H6DA H 0.3128(4) 0.8758(7) 0.6258(5) 0.056 Uiso 1 calc R . 
C7D C 0.3796(4) 0.8568(7) 0.6061(5) 0.051(2) Uani 1 d . . 
H7DA H 0.4004(4) 0.8593(7) 0.6551(5) 0.061 Uiso 1 calc R . 
C8D C 0.4009(4) 0.8426(7) 0.5518(5) 0.049(2) Uani 1 d . . 
C9D C 0.3713(4) 0.8392(7) 0.4799(5) 0.051(2) Uani 1 d . . 
H9DA H 0.3861(4) 0.8287(7) 0.4431(5) 0.061 Uiso 1 calc R . 
C10D C 0.3189(4) 0.8515(7) 0.4630(5) 0.046(2) Uani 1 d . . 
H10D H 0.2981(4) 0.8501(7) 0.4140(5) 0.055 Uiso 1 calc R . 
O11D O 0.4525(3) 0.8347(6) 0.5749(4) 0.065(2) Uani 1 d . . 
C12D C 0.4775(4) 0.8264(10) 0.5201(6) 0.080(4) Uani 1 d . . 
H12D H 0.5141(4) 0.8213(10) 0.5435(6) 0.120 Uiso 1 calc R . 
H12E H 0.4699(4) 0.8848(10) 0.4891(6) 0.120 Uiso 1 calc R . 
H12F H 0.4652(4) 0.7674(10) 0.4908(6) 0.120 Uiso 1 calc R . 
C1E C 0.1919(3) 0.6714(7) 0.2696(4) 0.039(2) Uani 1 d . . 
O1E O 0.1617(2) 0.7404(4) 0.2644(3) 0.047(2) Uani 1 d . . 
C2E C 0.2475(4) 0.6589(6) 0.2816(4) 0.039(2) Uani 1 d . . 
O2E O 0.2834(3) 0.7121(5) 0.2854(3) 0.054(2) Uani 1 d . . 
C3E C 0.2379(3) 0.5493(6) 0.2797(4) 0.034(2) Uani 1 d . . 
O3E O 0.2655(2) 0.4750(4) 0.2875(3) 0.0355(13) Uani 1 d . . 
C4E C 0.1851(3) 0.5652(6) 0.2642(4) 0.033(2) Uani 1 d . . 
C5E C 0.1425(3) 0.5028(7) 0.2469(4) 0.036(2) Uani 1 d . . 
C6E C 0.1494(3) 0.3982(7) 0.2438(4) 0.039(2) Uani 1 d . . 
H6EA H 0.1825(3) 0.3715(7) 0.2569(4) 0.047 Uiso 1 calc R . 
C7E C 0.1082(3) 0.3363(8) 0.2218(5) 0.048(2) Uani 1 d . . 
H7EA H 0.1127(3) 0.2672(8) 0.2196(5) 0.058 Uiso 1 calc R . 
C8E C 0.0601(4) 0.3762(8) 0.2031(5) 0.056(3) Uani 1 d D . 
C9E C 0.0525(3) 0.4756(9) 0.2072(5) 0.057(3) Uani 1 d . . 
H9EA H 0.0191(3) 0.5008(9) 0.1952(5) 0.069 Uiso 1 calc R . 
C10E C 0.0934(4) 0.5393(8) 0.2287(5) 0.056(3) Uani 1 d . . 
H10E H 0.0879(4) 0.6081(8) 0.2312(5) 0.067 Uiso 1 calc R . 
O11E O 0.0191(3) 0.3180(7) 0.1825(4) 0.099(3) Uani 1 d DU . 
C12E C 0.0188(7) 0.2165(9) 0.1893(11) 0.062(6) Uani 0.50 d PD 1 
H12M H -0.0159(7) 0.1921(9) 0.1702(11) 0.093 Uiso 0.50 calc PR 1 
H12N H 0.0330(7) 0.1985(9) 0.2403(11) 0.093 Uiso 0.50 calc PR 1 
H12O H 0.0393(7) 0.1870(9) 0.1623(11) 0.093 Uiso 0.50 calc PR 1 
C12* C -0.0272(4) 0.3332(14) 0.1283(8) 0.046(5) Uani 0.50 d PD 2 
H12P H -0.0495(4) 0.2769(14) 0.1266(8) 0.069 Uiso 0.50 calc PR 2 
H12Q H -0.0215(4) 0.3399(14) 0.0817(8) 0.069 Uiso 0.50 calc PR 2 
H12R H -0.0430(4) 0.3934(14) 0.1386(8) 0.069 Uiso 0.50 calc PR 2 
C1F C 0.1154(3) 0.8698(6) -0.0364(4) 0.029(2) Uani 1 d . . 
O1F O 0.0986(2) 0.8834(4) -0.1037(3) 0.0364(14) Uani 1 d . . 
C2F C 0.0895(3) 0.8571(6) 0.0207(4) 0.036(2) Uani 1 d . . 
O2F O 0.0463(2) 0.8592(5) 0.0217(3) 0.044(2) Uani 1 d . . 
C3F C 0.1409(3) 0.8479(6) 0.0737(4) 0.030(2) Uani 1 d . . 
O3F O 0.1570(2) 0.8325(4) 0.1399(3) 0.0351(13) Uani 1 d . . 
C4F C 0.1640(3) 0.8604(6) 0.0181(4) 0.028(2) Uani 1 d . . 
C5F C 0.2158(3) 0.8658(6) 0.0195(4) 0.031(2) Uani 1 d . . 
C6F C 0.2553(3) 0.8706(6) 0.0846(4) 0.033(2) Uani 1 d . . 
H6FA H 0.2481(3) 0.8686(6) 0.1288(4) 0.040 Uiso 1 calc R . 
C7F C 0.3046(3) 0.8781(6) 0.0855(5) 0.039(2) Uani 1 d . . 
H7FA H 0.3313(3) 0.8810(6) 0.1301(5) 0.046 Uiso 1 calc R . 
C8F C 0.3155(3) 0.8813(6) 0.0195(4) 0.035(2) Uani 1 d . . 
C9F C 0.2765(3) 0.8764(7) -0.0457(4) 0.040(2) Uani 1 d . . 
H9FA H 0.2836(3) 0.8785(7) -0.0900(4) 0.048 Uiso 1 calc R . 
C10F C 0.2269(3) 0.8685(6) -0.0452(4) 0.036(2) Uani 1 d . . 
H10F H 0.2002(3) 0.8648(6) -0.0897(4) 0.043 Uiso 1 calc R . 
O11F O 0.3649(2) 0.8883(5) 0.0258(3) 0.043(2) Uani 1 d . . 
C12F C 0.3774(3) 0.8993(8) -0.0396(5) 0.049(2) Uani 1 d . . 
H12G H 0.4142(3) 0.9036(8) -0.0280(5) 0.074 Uiso 1 calc R . 
H12H H 0.3618(3) 0.9595(8) -0.0646(5) 0.074 Uiso 1 calc R . 
H12I H 0.3648(3) 0.8422(8) -0.0709(5) 0.074 Uiso 1 calc R . 
O21 O 0.3510(2) 1.5759(4) 0.2566(3) 0.046(2) Uani 1 d . . 
O22 O 0.4116(2) 1.3991(6) 0.2441(3) 0.060(2) Uani 1 d . . 
O23 O 0.4218(2) 1.3372(5) 0.3795(3) 0.047(2) Uani 1 d . . 
O24 O 0.3734(2) 1.5239(4) 0.4001(3) 0.045(2) Uani 1 d . . 
O31 O 0.1335(2) 1.0687(4) 0.2879(3) 0.0372(14) Uani 1 d . . 
O32 O 0.0885(2) 0.8798(4) 0.3078(3) 0.0432(15) Uani 1 d . . 
O33 O 0.0610(2) 0.9046(5) 0.1645(3) 0.0433(14) Uani 1 d . . 
O34 O 0.1398(2) 1.0383(4) 0.1530(3) 0.0423(15) Uani 1 d . . 
O40 O 0.0062(5) 1.2496(9) -0.1991(6) 0.051(3) Uani 0.50 d P 1 
O50 O -0.0169(4) 0.0003(8) 0.1924(6) 0.037(3) Uani 0.50 d P 1 
O51 O 0.0032(4) 0.0760(8) 0.1715(6) 0.038(3) Uani 0.50 d P 2 
O60 O 0.0576(10) 0.8858(15) 0.5495(12) 0.048(8) Uani 0.50 d P . 
O61 O 0.0587(20) 0.9085(34) 0.5412(29) 0.035(12) Uiso 0.25 d P . 
O62 O 0.0606(12) 0.8580(21) 0.5595(17) 0.012(6) Uiso 0.25 d P . 
O70 O 0.4666(5) 0.3889(10) 0.8949(7) 0.093(4) Uani 0.70 d PU . 
O71 O 0.4741(15) 0.4274(29) 0.9341(20) 0.113(9) Uiso 0.30 d PU . 
O80 O 0.5201(9) 0.4496(18) 0.8297(12) 0.062(6) Uiso 0.30 d P . 
O81 O 0.5200(14) 0.3567(28) 0.8024(19) 0.065(10) Uiso 0.20 d P . 
O82 O 0.5436(13) 0.4044(32) 0.7431(19) 0.094(11) Uiso 0.25 d P . 
O83 O 0.5415(11) 0.3336(25) 0.7514(16) 0.067(8) Uiso 0.25 d P . 
O90 O 0.5160(9) 0.5759(19) 0.9256(13) 0.071(7) Uiso 0.30 d P . 
O91 O 0.5039(7) 0.5759(15) 0.8573(10) 0.044(5) Uiso 0.30 d P . 
O92 O 0.5053(7) 0.6506(15) 0.8431(10) 0.044(5) Uiso 0.30 d P . 
O93 O 0.4905(26) 0.7408(53) 0.7765(36) 0.065(19) Uiso 0.10 d P . 
  
loop_ 
 _atom_site_aniso_label 
 _atom_site_aniso_U_11 
 _atom_site_aniso_U_22 
 _atom_site_aniso_U_33 
 _atom_site_aniso_U_23 
 _atom_site_aniso_U_13 
 _atom_site_aniso_U_12 
Gd1 0.0303(2) 0.0359(2) 0.0270(2) -0.0009(2) 0.0090(2) -0.0022(2) 
Gd2 0.0362(2) 0.0327(2) 0.0242(2) -0.0021(2) 0.0038(2) 0.0056(2) 
C1A 0.038(5) 0.027(5) 0.024(4) -0.003(3) 0.007(3) -0.002(4) 
O1A 0.039(3) 0.052(4) 0.032(3) -0.008(3) 0.008(3) -0.006(3) 
C2A 0.054(6) 0.040(5) 0.025(4) 0.000(4) 0.016(4) 0.002(5) 
O2A 0.038(3) 0.067(4) 0.035(3) -0.002(3) 0.012(3) 0.000(3) 
C3A 0.047(5) 0.039(6) 0.034(5) 0.002(4) 0.016(4) 0.004(4) 
O3A 0.054(4) 0.052(4) 0.029(3) 0.000(3) 0.013(3) -0.001(3) 
C4A 0.052(6) 0.033(5) 0.031(4) -0.002(4) 0.012(4) 0.004(4) 
C5A 0.047(5) 0.032(5) 0.033(5) 0.003(4) 0.016(4) 0.006(4) 
C6A 0.054(6) 0.046(6) 0.031(5) 0.001(4) 0.024(4) -0.002(5) 
C7A 0.052(6) 0.040(5) 0.031(5) 0.001(4) 0.008(4) -0.005(4) 
C8A 0.044(6) 0.042(6) 0.041(5) -0.003(4) 0.016(4) 0.002(4) 
C9A 0.052(6) 0.058(6) 0.034(5) -0.002(4) 0.017(4) 0.001(5) 
C10A 0.053(6) 0.050(6) 0.029(5) -0.007(4) 0.008(4) 0.000(5) 
O11A 0.045(4) 0.086(6) 0.062(5) -0.026(4) 0.015(4) -0.009(4) 
C12A 0.058(13) 0.049(12) 0.060(12) -0.004(10) 0.033(11) -0.021(10) 
C12' 0.045(12) 0.067(15) 0.085(17) 0.016(13) 0.019(12) 0.010(11) 
C1B 0.040(5) 0.053(6) 0.019(4) -0.003(4) 0.007(4) 0.000(4) 
O1B 0.053(4) 0.039(4) 0.039(3) -0.009(3) 0.017(3) -0.010(3) 
C2B 0.043(5) 0.045(6) 0.017(4) 0.002(4) 0.004(4) -0.001(4) 
O2B 0.055(4) 0.030(3) 0.040(3) 0.002(3) 0.012(3) 0.005(3) 
C3B 0.053(6) 0.029(5) 0.022(4) 0.005(4) 0.008(4) -0.002(4) 
O3B 0.040(3) 0.039(4) 0.028(3) -0.001(3) 0.000(3) 0.002(3) 
C4B 0.044(5) 0.032(5) 0.024(4) -0.004(3) 0.010(4) -0.006(4) 
C5B 0.039(5) 0.043(5) 0.027(4) 0.003(4) 0.008(4) -0.001(4) 
C6B 0.043(5) 0.046(6) 0.029(4) -0.002(4) 0.001(4) 0.000(5) 
C7B 0.049(6) 0.036(5) 0.042(5) 0.002(4) 0.005(4) 0.006(4) 
C8B 0.047(6) 0.052(7) 0.043(5) 0.006(5) 0.001(4) 0.013(5) 
C9B 0.042(6) 0.055(7) 0.044(5) -0.002(5) 0.006(4) -0.010(5) 
C10B 0.046(6) 0.053(6) 0.033(5) -0.010(4) -0.001(4) -0.007(5) 
O11B 0.045(4) 0.068(5) 0.074(5) 0.003(4) -0.004(4) 0.013(4) 
C12B 0.045(6) 0.083(9) 0.064(7) 0.000(6) 0.002(5) 0.000(6) 
C1C 0.039(5) 0.032(5) 0.034(5) -0.002(4) 0.008(4) -0.002(4) 
O1C 0.049(4) 0.052(4) 0.036(3) -0.013(3) 0.009(3) 0.006(3) 
C2C 0.038(5) 0.038(5) 0.028(4) 0.008(4) 0.006(4) 0.003(4) 
O2C 0.040(4) 0.071(5) 0.040(4) 0.004(3) 0.008(3) -0.001(3) 
C3C 0.037(5) 0.034(5) 0.037(5) 0.007(4) 0.014(4) -0.003(4) 
O3C 0.034(3) 0.054(4) 0.025(3) -0.003(3) 0.008(2) -0.002(3) 
C4C 0.040(5) 0.030(5) 0.032(4) 0.002(4) 0.014(4) -0.006(4) 
C5C 0.038(5) 0.030(4) 0.026(4) -0.004(3) 0.005(4) -0.003(4) 
C6C 0.053(6) 0.038(5) 0.033(5) -0.001(4) 0.015(4) 0.001(4) 
C7C 0.042(5) 0.039(5) 0.034(5) 0.002(4) 0.003(4) 0.004(4) 
C8C 0.040(5) 0.032(5) 0.037(5) 0.004(4) 0.006(4) 0.001(4) 
C9C 0.044(5) 0.037(5) 0.033(5) -0.005(4) 0.007(4) -0.004(4) 
C10C 0.039(5) 0.037(5) 0.026(4) 0.004(4) 0.003(4) -0.002(4) 
O11C 0.038(3) 0.058(4) 0.042(3) -0.003(3) 0.019(3) -0.002(3) 
C12C 0.029(9) 0.050(12) 0.038(9) -0.012(8) 0.004(7) 0.002(8) 
C12" 0.038(10) 0.049(11) 0.045(10) 0.003(9) 0.011(8) -0.003(9) 
C1D 0.051(6) 0.022(5) 0.045(5) -0.002(4) 0.014(4) 0.001(4) 
O1D 0.060(4) 0.047(4) 0.021(3) -0.007(3) 0.013(3) 0.003(3) 
C2D 0.046(5) 0.019(4) 0.033(4) -0.001(3) 0.008(4) -0.001(4) 
O2D 0.052(4) 0.052(4) 0.031(3) 0.003(3) 0.011(3) -0.004(3) 
C3D 0.051(5) 0.025(5) 0.034(5) 0.003(4) 0.006(4) 0.002(4) 
O3D 0.054(4) 0.045(4) 0.028(3) 0.002(3) 0.006(3) -0.002(3) 
C4D 0.048(5) 0.029(5) 0.025(4) -0.008(3) 0.004(4) -0.002(4) 
C5D 0.052(6) 0.030(5) 0.028(4) 0.000(4) 0.003(4) 0.008(4) 
C6D 0.054(6) 0.052(6) 0.031(5) 0.005(4) 0.007(4) 0.006(5) 
C7D 0.057(6) 0.049(6) 0.036(5) -0.004(4) 0.000(5) 0.000(5) 
C8D 0.046(6) 0.042(6) 0.047(6) -0.001(5) 0.001(5) 0.004(5) 
C9D 0.059(7) 0.051(6) 0.043(5) 0.000(5) 0.016(5) 0.005(5) 
C10D 0.052(6) 0.051(6) 0.029(5) 0.001(4) 0.003(4) 0.003(5) 
O11D 0.052(4) 0.073(5) 0.062(5) -0.003(4) 0.009(4) 0.012(4) 
C12D 0.051(7) 0.113(11) 0.075(8) -0.002(8) 0.018(6) 0.008(7) 
C1E 0.054(6) 0.040(5) 0.021(4) -0.002(4) 0.009(4) 0.008(4) 
O1E 0.063(4) 0.040(4) 0.034(3) -0.001(3) 0.011(3) 0.022(3) 
C2E 0.058(6) 0.031(5) 0.031(5) 0.002(4) 0.017(4) -0.008(4) 
O2E 0.071(5) 0.046(4) 0.049(4) 0.003(3) 0.023(4) -0.008(4) 
C3E 0.040(5) 0.037(5) 0.023(4) -0.003(4) 0.006(4) -0.008(4) 
O3E 0.040(3) 0.031(3) 0.038(3) 0.002(3) 0.015(3) 0.000(3) 
C4E 0.042(5) 0.027(5) 0.025(4) -0.003(3) 0.003(4) 0.011(4) 
C5E 0.037(5) 0.043(5) 0.025(4) -0.003(4) 0.005(4) 0.015(4) 
C6E 0.033(5) 0.056(6) 0.027(4) 0.000(4) 0.008(4) -0.005(4) 
C7E 0.042(6) 0.060(6) 0.037(5) 0.008(5) 0.005(4) -0.002(5) 
C8E 0.041(6) 0.079(8) 0.044(6) 0.022(5) 0.008(5) -0.010(5) 
C9E 0.025(5) 0.085(9) 0.055(6) 0.000(6) 0.005(4) 0.013(5) 
C10E 0.043(6) 0.072(7) 0.046(6) -0.016(5) 0.006(5) 0.013(5) 
O11E 0.060(5) 0.131(7) 0.085(5) 0.052(5) -0.007(4) -0.041(5) 
C12E 0.036(11) 0.090(18) 0.053(12) -0.008(12) 0.004(9) 0.001(11) 
C12* 0.021(9) 0.060(13) 0.046(10) -0.008(9) -0.004(8) -0.002(8) 
C1F 0.038(5) 0.020(4) 0.029(4) 0.001(3) 0.008(4) -0.001(3) 
O1F 0.037(3) 0.049(4) 0.023(3) 0.001(2) 0.009(2) 0.001(3) 
C2F 0.041(5) 0.038(5) 0.029(4) -0.002(4) 0.010(4) 0.005(4) 
O2F 0.030(3) 0.068(4) 0.030(3) -0.002(3) 0.005(3) -0.002(3) 
C3F 0.032(4) 0.027(4) 0.034(5) -0.002(3) 0.013(4) -0.002(3) 
O3F 0.041(3) 0.035(3) 0.027(3) -0.005(2) 0.007(3) 0.005(3) 
C4F 0.037(5) 0.023(4) 0.026(4) -0.004(3) 0.011(4) 0.002(3) 
C5F 0.037(5) 0.024(4) 0.031(4) 0.000(3) 0.009(4) 0.005(4) 
C6F 0.039(5) 0.030(4) 0.031(4) -0.003(3) 0.012(4) -0.001(4) 
C7F 0.031(5) 0.043(5) 0.038(5) 0.000(4) 0.005(4) 0.001(4) 
C8F 0.029(4) 0.041(5) 0.034(4) 0.000(4) 0.009(4) -0.001(4) 
C9F 0.033(5) 0.054(6) 0.030(4) 0.004(4) 0.009(4) 0.004(4) 
C10F 0.034(5) 0.041(5) 0.030(4) 0.002(4) 0.005(4) 0.001(4) 
O11F 0.037(3) 0.059(4) 0.037(3) -0.003(3) 0.016(3) -0.004(3) 
C12F 0.042(5) 0.065(7) 0.047(5) 0.005(5) 0.022(4) -0.002(5) 
O21 0.056(4) 0.042(4) 0.041(3) 0.006(3) 0.015(3) -0.007(3) 
O22 0.033(3) 0.103(6) 0.043(4) 0.006(4) 0.012(3) 0.005(4) 
O23 0.042(4) 0.059(4) 0.038(3) 0.001(3) 0.010(3) 0.009(3) 
O24 0.058(4) 0.043(4) 0.039(3) -0.011(3) 0.023(3) -0.007(3) 
O31 0.042(3) 0.034(3) 0.033(3) -0.003(2) 0.009(3) 0.002(3) 
O32 0.046(4) 0.048(4) 0.032(3) 0.003(3) 0.007(3) -0.010(3) 
O33 0.033(3) 0.064(4) 0.033(3) -0.003(3) 0.010(2) 0.005(3) 
O34 0.048(4) 0.045(4) 0.029(3) 0.000(3) 0.006(3) 0.012(3) 
O40 0.054(8) 0.051(8) 0.048(7) -0.003(6) 0.017(6) 0.001(6) 
O50 0.039(7) 0.034(7) 0.042(7) -0.002(5) 0.016(6) 0.008(5) 
O51 0.049(7) 0.029(7) 0.034(6) 0.003(5) 0.008(5) 0.013(6) 
O60 0.076(15) 0.022(15) 0.040(13) 0.014(11) 0.009(9) -0.002(12) 
O70 0.080(8) 0.082(9) 0.094(9) -0.018(7) -0.006(7) 0.032(7) 
  
_geom_special_details 
; 
 All esds (except the esd in the dihedral angle between two l.s. planes) 
 are estimated using the full covariance matrix.  The cell esds are taken 
 into account individually in the estimation of esds in distances, angles 
 and torsion angles; correlations between esds in cell parameters are only 
 used when they are defined by crystal symmetry.  An approximate (isotropic) 
 treatment of cell esds is used for estimating esds involving l.s. planes. 
; 
  
loop_ 
 _geom_bond_atom_site_label_1 
 _geom_bond_atom_site_label_2 
 _geom_bond_distance 
 _geom_bond_site_symmetry_2 
 _geom_bond_publ_flag 
Gd1 O1B 2.327(6) . ? 
Gd1 O3E 2.338(6) 1_565 ? 
Gd1 O1A 2.340(5) . ? 
Gd1 O3C 2.374(5) . ? 
Gd1 O23 2.417(6) . ? 
Gd1 O22 2.435(6) . ? 
Gd1 O24 2.442(5) . ? 
Gd1 O21 2.445(6) . ? 
Gd2 O1E 2.344(6) . ? 
Gd2 O3B 2.350(6) . ? 
Gd2 O3F 2.368(5) . ? 
Gd2 O1D 2.379(5) . ? 
Gd2 O31 2.408(5) . ? 
Gd2 O32 2.440(6) . ? 
Gd2 O34 2.446(6) . ? 
Gd2 O33 2.462(5) . ? 
C1A O1A 1.257(9) . ? 
C1A C4A 1.433(11) . ? 
C1A C2A 1.488(11) . ? 
C2A O2A 1.239(10) . ? 
C2A C3A 1.479(12) . ? 
C3A O3A 1.246(9) . ? 
C3A C4A 1.436(12) . ? 
C4A C5A 1.440(12) . ? 
C5A C10A 1.391(11) . ? 
C5A C6A 1.412(11) . ? 
C6A C7A 1.372(12) . ? 
C7A C8A 1.388(11) . ? 
C8A O11A 1.346(10) . ? 
C8A C9A 1.395(12) . ? 
C9A C10A 1.380(12) . ? 
O11A C12' 1.423(9) . ? 
O11A C12A 1.426(9) . ? 
C1B O1B 1.255(10) . ? 
C1B C4B 1.435(12) . ? 
C1B C2B 1.493(12) . ? 
C2B O2B 1.234(10) . ? 
C2B C3B 1.504(12) . ? 
C3B O3B 1.253(10) . ? 
C3B C4B 1.438(12) . ? 
C4B C5B 1.419(11) . ? 
C5B C10B 1.385(12) . ? 
C5B C6B 1.436(12) . ? 
C6B C7B 1.362(12) . ? 
C7B C8B 1.383(13) . ? 
C8B O11B 1.363(11) . ? 
C8B C9B 1.379(13) . ? 
C9B C10B 1.384(13) . ? 
O11B C12B 1.416(11) . ? 
C1C O1C 1.225(9) . ? 
C1C C4C 1.456(11) . ? 
C1C C2C 1.489(11) . ? 
C2C O2C 1.228(10) . ? 
C2C C3C 1.496(11) . ? 
C3C O3C 1.265(9) . ? 
C3C C4C 1.438(11) . ? 
C4C C5C 1.422(11) . ? 
C5C C6C 1.397(11) . ? 
C5C C10C 1.417(11) . ? 
C6C C7C 1.389(12) . ? 
C7C C8C 1.371(11) . ? 
C8C O11C 1.373(9) . ? 
C8C C9C 1.389(11) . ? 
C9C C10C 1.366(11) . ? 
O11C C12C 1.432(8) . ? 
O11C C12" 1.438(9) . ? 
C1D O1D 1.254(9) . ? 
C1D C4D 1.400(11) . ? 
C1D C2D 1.512(12) . ? 
C2D O2D 1.222(10) . ? 
C2D C3D 1.521(11) . ? 
C3D O3D 1.234(9) . ? 
C3D C4D 1.442(12) . ? 
C4D C5D 1.443(12) . ? 
C5D C6D 1.389(11) . ? 
C5D C10D 1.402(12) . ? 
C6D C7D 1.391(13) . ? 
C7D C8D 1.390(13) . ? 
C8D O11D 1.370(11) . ? 
C8D C9D 1.386(12) . ? 
C9D C10D 1.404(13) . ? 
O11D C12D 1.459(12) . ? 
C1E O1E 1.243(10) . ? 
C1E C4E 1.453(12) . ? 
C1E C2E 1.503(13) . ? 
C2E O2E 1.218(10) . ? 
C2E C3E 1.509(12) . ? 
C3E O3E 1.249(10) . ? 
C3E C4E 1.424(11) . ? 
O3E Gd1 2.338(6) 1_545 ? 
C4E C5E 1.411(12) . ? 
C5E C10E 1.393(12) . ? 
C5E C6E 1.437(12) . ? 
C6E C7E 1.378(12) . ? 
C7E C8E 1.383(13) . ? 
C8E O11E 1.344(11) . ? 
C8E C9E 1.372(14) . ? 
C9E C10E 1.386(14) . ? 
O11E C12E 1.384(9) . ? 
O11E C12* 1.400(9) . ? 
C1F O1F 1.264(9) . ? 
C1F C4F 1.439(11) . ? 
C1F C2F 1.523(11) . ? 
C2F O2F 1.215(9) . ? 
C2F C3F 1.484(11) . ? 
C3F O3F 1.246(9) . ? 
C3F C4F 1.442(10) . ? 
C4F C5F 1.438(11) . ? 
C5F C6F 1.395(11) . ? 
C5F C10F 1.400(11) . ? 
C6F C7F 1.374(11) . ? 
C7F C8F 1.421(11) . ? 
C8F O11F 1.350(9) . ? 
C8F C9F 1.389(11) . ? 
C9F C10F 1.392(11) . ? 
O11F C12F 1.439(9) . ? 
O61 O62 0.77(6) . ? 
O70 O71 0.90(4) . ? 
O80 O81 1.37(4) . ? 
O81 O83 1.36(4) . ? 
O81 O82 1.64(5) . ? 
O81 O83 1.73(4) 2_656 ? 
O82 O83 0.98(4) . ? 
O83 O81 1.73(4) 2_656 ? 
O90 O91 1.27(3) . ? 
O91 O92 1.05(2) . ? 
O92 O93 1.74(7) . ? 
O93 O93 1.31(12) 2_656 ? 
  
loop_ 
 _geom_angle_atom_site_label_1 
 _geom_angle_atom_site_label_2 
 _geom_angle_atom_site_label_3 
 _geom_angle 
 _geom_angle_site_symmetry_1 
 _geom_angle_site_symmetry_3 
 _geom_angle_publ_flag 
O1B Gd1 O3E 101.7(2) . 1_565 ? 
O1B Gd1 O1A 73.2(2) . . ? 
O3E Gd1 O1A 76.5(2) 1_565 . ? 
O1B Gd1 O3C 73.0(2) . . ? 
O3E Gd1 O3C 73.4(2) 1_565 . ? 
O1A Gd1 O3C 128.2(2) . . ? 
O1B Gd1 O23 80.9(2) . . ? 
O3E Gd1 O23 146.8(2) 1_565 . ? 
O1A Gd1 O23 134.2(2) . . ? 
O3C Gd1 O23 75.9(2) . . ? 
O1B Gd1 O22 91.0(2) . . ? 
O3E Gd1 O22 144.2(2) 1_565 . ? 
O1A Gd1 O22 75.5(2) . . ? 
O3C Gd1 O22 142.3(2) . . ? 
O23 Gd1 O22 67.8(2) . . ? 
O1B Gd1 O24 141.0(2) . . ? 
O3E Gd1 O24 83.5(2) 1_565 . ? 
O1A Gd1 O24 144.1(2) . . ? 
O3C Gd1 O24 71.7(2) . . ? 
O23 Gd1 O24 75.1(2) . . ? 
O22 Gd1 O24 107.2(2) . . ? 
O1B Gd1 O21 150.0(2) . . ? 
O3E Gd1 O21 77.0(2) 1_565 . ? 
O1A Gd1 O21 77.5(2) . . ? 
O3C Gd1 O21 132.7(2) . . ? 
O23 Gd1 O21 116.8(2) . . ? 
O22 Gd1 O21 75.6(2) . . ? 
O24 Gd1 O21 69.0(2) . . ? 
O1E Gd2 O3B 101.7(2) . . ? 
O1E Gd2 O3F 70.1(2) . . ? 
O3B Gd2 O3F 81.1(2) . . ? 
O1E Gd2 O1D 74.4(2) . . ? 
O3B Gd2 O1D 73.3(2) . . ? 
O3F Gd2 O1D 130.3(2) . . ? 
O1E Gd2 O31 148.5(2) . . ? 
O3B Gd2 O31 89.0(2) . . ? 
O3F Gd2 O31 141.4(2) . . ? 
O1D Gd2 O31 80.7(2) . . ? 
O1E Gd2 O32 80.7(2) . . ? 
O3B Gd2 O32 146.5(2) . . ? 
O3F Gd2 O32 129.4(2) . . ? 
O1D Gd2 O32 75.4(2) . . ? 
O31 Gd2 O32 74.5(2) . . ? 
O1E Gd2 O34 142.9(2) . . ? 
O3B Gd2 O34 73.1(2) . . ? 
O3F Gd2 O34 72.9(2) . . ? 
O1D Gd2 O34 134.1(2) . . ? 
O31 Gd2 O34 68.5(2) . . ? 
O32 Gd2 O34 124.2(2) . . ? 
O1E Gd2 O33 98.1(2) . . ? 
O3B Gd2 O33 144.0(2) . . ? 
O3F Gd2 O33 77.8(2) . . ? 
O1D Gd2 O33 141.7(2) . . ? 
O31 Gd2 O33 89.6(2) . . ? 
O32 Gd2 O33 66.4(2) . . ? 
O34 Gd2 O33 72.9(2) . . ? 
O1A C1A C4A 135.9(8) . . ? 
O1A C1A C2A 134.7(7) . . ? 
C4A C1A C2A 89.4(6) . . ? 
C1A O1A Gd1 150.5(5) . . ? 
O2A C2A C3A 136.4(7) . . ? 
O2A C2A C1A 135.0(7) . . ? 
C3A C2A C1A 88.5(7) . . ? 
O3A C3A C4A 135.1(8) . . ? 
O3A C3A C2A 135.3(8) . . ? 
C4A C3A C2A 89.6(6) . . ? 
C1A C4A C3A 92.5(7) . . ? 
C1A C4A C5A 133.0(7) . . ? 
C3A C4A C5A 134.5(8) . . ? 
C10A C5A C6A 117.3(8) . . ? 
C10A C5A C4A 122.8(8) . . ? 
C6A C5A C4A 119.9(7) . . ? 
C7A C6A C5A 122.0(8) . . ? 
C6A C7A C8A 119.2(8) . . ? 
O11A C8A C7A 119.0(8) . . ? 
O11A C8A C9A 120.7(8) . . ? 
C7A C8A C9A 120.2(8) . . ? 
C10A C9A C8A 119.8(8) . . ? 
C9A C10A C5A 121.5(8) . . ? 
C8A O11A C12' 125.8(9) . . ? 
C8A O11A C12A 121.5(9) . . ? 
O1B C1B C4B 133.3(8) . . ? 
O1B C1B C2B 135.6(9) . . ? 
C4B C1B C2B 91.1(7) . . ? 
C1B O1B Gd1 153.6(6) . . ? 
O2B C2B C1B 137.4(9) . . ? 
O2B C2B C3B 135.6(8) . . ? 
C1B C2B C3B 86.7(7) . . ? 
O3B C3B C4B 135.7(8) . . ? 
O3B C3B C2B 133.7(8) . . ? 
C4B C3B C2B 90.6(7) . . ? 
C3B O3B Gd2 140.7(6) . . ? 
C5B C4B C1B 133.4(8) . . ? 
C5B C4B C3B 135.0(8) . . ? 
C1B C4B C3B 91.4(7) . . ? 
C10B C5B C4B 121.6(8) . . ? 
C10B C5B C6B 117.5(8) . . ? 
C4B C5B C6B 120.8(8) . . ? 
C7B C6B C5B 119.3(9) . . ? 
C6B C7B C8B 122.0(9) . . ? 
O11B C8B C9B 124.6(9) . . ? 
O11B C8B C7B 115.9(9) . . ? 
C9B C8B C7B 119.5(9) . . ? 
C8B C9B C10B 119.5(9) . . ? 
C9B C10B C5B 122.1(9) . . ? 
C8B O11B C12B 117.3(9) . . ? 
O1C C1C C4C 136.8(8) . . ? 
O1C C1C C2C 133.4(8) . . ? 
C4C C1C C2C 89.8(6) . . ? 
O2C C2C C1C 136.5(8) . . ? 
O2C C2C C3C 135.3(8) . . ? 
C1C C2C C3C 88.2(6) . . ? 
O3C C3C C4C 135.3(8) . . ? 
O3C C3C C2C 134.4(7) . . ? 
C4C C3C C2C 90.2(7) . . ? 
C3C O3C Gd1 137.5(5) . . ? 
C5C C4C C3C 132.0(8) . . ? 
C5C C4C C1C 136.3(7) . . ? 
C3C C4C C1C 91.7(7) . . ? 
C6C C5C C10C 117.3(8) . . ? 
C6C C5C C4C 120.7(7) . . ? 
C10C C5C C4C 122.0(7) . . ? 
C7C C6C C5C 121.5(8) . . ? 
C8C C7C C6C 119.3(8) . . ? 
C7C C8C O11C 119.9(7) . . ? 
C7C C8C C9C 120.9(8) . . ? 
O11C C8C C9C 119.2(7) . . ? 
C10C C9C C8C 119.8(8) . . ? 
C9C C10C C5C 121.1(7) . . ? 
C8C O11C C12C 117.8(8) . . ? 
C8C O11C C12" 123.1(8) . . ? 
O1D C1D C4D 137.0(9) . . ? 
O1D C1D C2D 132.6(8) . . ? 
C4D C1D C2D 90.4(7) . . ? 
C1D O1D Gd2 150.9(6) . . ? 
O2D C2D C1D 135.9(8) . . ? 
O2D C2D C3D 137.5(8) . . ? 
C1D C2D C3D 86.7(7) . . ? 
O3D C3D C4D 137.5(8) . . ? 
O3D C3D C2D 134.0(8) . . ? 
C4D C3D C2D 88.5(6) . . ? 
C1D C4D C3D 94.2(7) . . ? 
C1D C4D C5D 133.8(8) . . ? 
C3D C4D C5D 132.0(7) . . ? 
C6D C5D C10D 118.7(9) . . ? 
C6D C5D C4D 121.0(8) . . ? 
C10D C5D C4D 120.3(8) . . ? 
C5D C6D C7D 120.7(9) . . ? 
C8D C7D C6D 119.7(9) . . ? 
O11D C8D C9D 123.8(9) . . ? 
O11D C8D C7D 114.9(8) . . ? 
C9D C8D C7D 121.3(9) . . ? 
C8D C9D C10D 118.3(9) . . ? 
C5D C10D C9D 121.3(8) . . ? 
C8D O11D C12D 117.5(8) . . ? 
O1E C1E C4E 132.2(9) . . ? 
O1E C1E C2E 137.5(9) . . ? 
C4E C1E C2E 90.2(7) . . ? 
C1E O1E Gd2 144.5(6) . . ? 
O2E C2E C1E 136.9(9) . . ? 
O2E C2E C3E 136.2(9) . . ? 
C1E C2E C3E 86.6(7) . . ? 
O3E C3E C4E 134.8(8) . . ? 
O3E C3E C2E 134.0(8) . . ? 
C4E C3E C2E 91.1(7) . . ? 
C3E O3E Gd1 148.6(5) . 1_545 ? 
C5E C4E C3E 134.2(7) . . ? 
C5E C4E C1E 133.9(8) . . ? 
C3E C4E C1E 91.8(7) . . ? 
C10E C5E C4E 122.3(9) . . ? 
C10E C5E C6E 118.3(9) . . ? 
C4E C5E C6E 119.3(7) . . ? 
C7E C6E C5E 120.4(8) . . ? 
C6E C7E C8E 119.1(10) . . ? 
O11E C8E C9E 117.5(10) . . ? 
O11E C8E C7E 120.8(10) . . ? 
C9E C8E C7E 121.7(9) . . ? 
C8E C9E C10E 120.2(9) . . ? 
C9E C10E C5E 120.3(10) . . ? 
C8E O11E C12E 125.8(11) . . ? 
C8E O11E C12* 129.3(10) . . ? 
O1F C1F C4F 137.3(7) . . ? 
O1F C1F C2F 132.6(7) . . ? 
C4F C1F C2F 90.2(6) . . ? 
O2F C2F C3F 137.4(7) . . ? 
O2F C2F C1F 135.8(8) . . ? 
C3F C2F C1F 86.7(6) . . ? 
O3F C3F C4F 134.9(7) . . ? 
O3F C3F C2F 133.4(7) . . ? 
C4F C3F C2F 91.7(6) . . ? 
C3F O3F Gd2 136.1(5) . . ? 
C5F C4F C1F 135.6(7) . . ? 
C5F C4F C3F 132.9(7) . . ? 
C1F C4F C3F 91.5(6) . . ? 
C6F C5F C10F 119.0(7) . . ? 
C6F C5F C4F 121.2(7) . . ? 
C10F C5F C4F 119.8(7) . . ? 
C7F C6F C5F 120.9(7) . . ? 
C6F C7F C8F 119.6(8) . . ? 
O11F C8F C9F 124.4(7) . . ? 
O11F C8F C7F 115.4(7) . . ? 
C9F C8F C7F 120.2(7) . . ? 
C8F C9F C10F 119.1(7) . . ? 
C9F C10F C5F 121.2(7) . . ? 
C8F O11F C12F 117.3(6) . . ? 
O83 O81 O80 123.6(32) . . ? 
O83 O81 O82 36.6(18) . . ? 
O80 O81 O82 87.8(26) . . ? 
O83 O81 O83 95.5(27) . 2_656 ? 
O80 O81 O83 106.4(27) . 2_656 ? 
O82 O81 O83 100.7(25) . 2_656 ? 
O83 O82 O81 55.8(29) . . ? 
O82 O83 O81 87.6(36) . . ? 
O82 O83 O81 79.7(33) . 2_656 ? 
O81 O83 O81 79.6(27) . 2_656 ? 
O92 O91 O90 105.0(23) . . ? 
O91 O92 O93 148.7(31) . . ? 
O93 O93 O92 122.4(46) 2_656 . ? 
  
_refine_diff_density_max    1.028 
_refine_diff_density_min   -0.805 
_refine_diff_density_rms    0.126 
  
#===END

 
data_Compound 4
  
_audit_creation_method            SHELXL 
_chemical_name_systematic 
; 
 ? 
; 
_chemical_name_common             ? 
_chemical_formula_moiety          ? 
_chemical_formula_structural      ? 
_chemical_formula_analytical      ? 
_chemical_formula_sum             'C66 H62 O34 Tb2' 
_chemical_formula_weight          1717.00 
_chemical_melting_point           ? 
_chemical_compound_source         ? 
  
loop_ 
 _atom_type_symbol 
 _atom_type_description 
 _atom_type_scat_dispersion_real 
 _atom_type_scat_dispersion_imag 
 _atom_type_scat_source 
 'C'  'C'   0.0033   0.0016 
 'International Tables Vol C Tables 4.2.6.8 and 6.1.1.4' 
 'H'  'H'   0.0000   0.0000 
 'International Tables Vol C Tables 4.2.6.8 and 6.1.1.4' 
 'O'  'O'   0.0106   0.0060 
 'International Tables Vol C Tables 4.2.6.8 and 6.1.1.4' 
 'Tb'  'Tb'  -0.1723   4.1537 
 'International Tables Vol C Tables 4.2.6.8 and 6.1.1.4' 
  
_symmetry_cell_setting            Triclinic 
_symmetry_space_group_name_H-M    P-1 
  
loop_ 
 _symmetry_equiv_pos_as_xyz 
 'x, y, z' 
 '-x, -y, -z' 
  
_cell_length_a                    9.9302(2) 
_cell_length_b                    26.3743(5) 
_cell_length_c                    28.5376(5) 
_cell_angle_alpha                 62.9737(9) 
_cell_angle_beta                  81.5369(7) 
_cell_angle_gamma                 87.1893(7) 
_cell_volume                      6584.0(2) 
_cell_formula_units_Z             4 
_cell_measurement_temperature     150(2) 
_cell_measurement_reflns_used     ? 
_cell_measurement_theta_min       ? 
_cell_measurement_theta_max       ? 
  
_exptl_crystal_description        needles 
_exptl_crystal_colour             'Pale yellow' 
_exptl_crystal_size_max           0.18 
_exptl_crystal_size_mid           0.03 
_exptl_crystal_size_min           0.02 
_exptl_crystal_density_meas       ? 
_exptl_crystal_density_diffrn     1.732 
_exptl_crystal_density_method     ? 
_exptl_crystal_F_000              3440 
_exptl_absorpt_coefficient_mu     2.230 
_exptl_absorpt_correction_type    Empirical 
_exptl_absorpt_correction_T_min   0.6897 
_exptl_absorpt_correction_T_max   0.9568 
  
_exptl_special_details 
; 
 ? 
; 
  
_diffrn_ambient_temperature       150(2) 
_diffrn_radiation_wavelength      0.71073 
_diffrn_radiation_type            MoK\a 
_diffrn_radiation_source          'fine-focus sealed tube' 
_diffrn_radiation_monochromator   graphite 
_diffrn_measurement_device        'Nonius Kappa CCD' 
_diffrn_measurement_method        '\w scans' 
_diffrn_standards_number          ? 
_diffrn_standards_interval_count  ? 
_diffrn_standards_interval_time   ? 
_diffrn_standards_decay_%         ? 
_diffrn_reflns_number             23307 
_diffrn_reflns_av_R_equivalents   0.0000 
_diffrn_reflns_av_sigmaI/netI     0.0932 
_diffrn_reflns_limit_h_min        -11 
_diffrn_reflns_limit_h_max        11 
_diffrn_reflns_limit_k_min        -27 
_diffrn_reflns_limit_k_max        31 
_diffrn_reflns_limit_l_min        0 
_diffrn_reflns_limit_l_max        33 
_diffrn_reflns_theta_min          2.57 
_diffrn_reflns_theta_max          25.13 
_reflns_number_total              23307 
_reflns_number_observed           16237 
_reflns_observed_criterion        >2sigma(I) 
  
_computing_data_collection        ? 
_computing_cell_refinement        ? 
_computing_data_reduction         ? 
_computing_structure_solution     'SHELXS-86 (Sheldrick, 1990)' 
_computing_structure_refinement   'SHELXL-93 (Sheldrick, 1993)' 
_computing_molecular_graphics     'Siemens SHELXTL' 
_computing_publication_material   'Siemens SHELXTL' 
  
_refine_special_details 
; 
 Refinement on F^2^ for ALL reflections except for 2343 with very negative F^2^ 
 or flagged by the user for potential systematic errors.  Weighted R-factors 
 wR and all goodnesses of fit S are based on F^2^, conventional R-factors R 
 are based on F, with F set to zero for negative F^2^. The observed criterion 
 of F^2^ > 2sigma(F^2^) is used only for calculating _R_factor_obs etc. and is 
 not relevant to the choice of reflections for refinement.  R-factors based 
 on F^2^ are statistically about twice as large as those based on F, and R- 
 factors based on ALL data will be even larger. 
; 
  
_refine_ls_structure_factor_coef  Fsqd 
_refine_ls_matrix_type            fullcycle 
_refine_ls_weighting_scheme 
 'calc w=1/[\s^2^(Fo^2^)+(0.0000P)^2^+31.7322P] where P=(Fo^2^+2Fc^2^)/3' 
_atom_sites_solution_primary      direct 
_atom_sites_solution_secondary    difmap 
_atom_sites_solution_hydrogens    geom 
_refine_ls_hydrogen_treatment     ? 
_refine_ls_extinction_method      SHELXL 
_refine_ls_extinction_coef        0.00053(4) 
_refine_ls_extinction_expression 
 'Fc^*^=kFc[1+0.001xFc^2^\l^3^/sin(2\q)]^-1/4^' 
_refine_ls_number_reflns          20964 
_refine_ls_number_parameters      1838 
_refine_ls_number_restraints      0 
_refine_ls_R_factor_all           0.0941 
_refine_ls_R_factor_obs           0.0536 
_refine_ls_wR_factor_all          0.1325 
_refine_ls_wR_factor_obs          0.1082 
_refine_ls_goodness_of_fit_all    1.063 
_refine_ls_goodness_of_fit_obs    1.111 
_refine_ls_restrained_S_all       1.117 
_refine_ls_restrained_S_obs       1.111 
_refine_ls_shift/esd_max          0.002 
_refine_ls_shift/esd_mean         0.000 
  
loop_ 
 _atom_site_label 
 _atom_site_type_symbol 
 _atom_site_fract_x 
 _atom_site_fract_y 
 _atom_site_fract_z 
 _atom_site_U_iso_or_equiv 
 _atom_site_thermal_displace_type 
 _atom_site_occupancy 
 _atom_site_calc_flag 
 _atom_site_refinement_flags 
 _atom_site_disorder_group 
Tb1 Tb 0.78812(4) 0.114567(15) 0.197179(14) 0.02083(9) Uani 1 d . . 
O11 O 0.5927(5) 0.0892(2) 0.1709(2) 0.0321(13) Uani 1 d . . 
O12 O 0.7096(6) 0.0267(2) 0.2703(2) 0.046(2) Uani 1 d . . 
O13 O 0.9771(5) 0.0615(2) 0.2397(2) 0.0287(12) Uani 1 d . . 
O14 O 0.8721(5) 0.0531(2) 0.1570(2) 0.0295(12) Uani 1 d . . 
Tb2 Tb 0.76369(4) 0.375604(15) 0.296065(14) 0.02159(9) Uani 1 d . . 
O21 O 0.8613(5) 0.4647(2) 0.2293(2) 0.0313(13) Uani 1 d . . 
O22 O 0.7462(5) 0.4409(2) 0.3366(2) 0.0302(12) Uani 1 d . . 
O23 O 0.5575(5) 0.4325(2) 0.2746(2) 0.0303(13) Uani 1 d . . 
O24 O 0.6829(6) 0.3791(2) 0.2187(2) 0.0345(13) Uani 1 d . . 
O25 O 0.6027(5) 0.3355(2) 0.3735(2) 0.0292(12) Uani 1 d . . 
C1A C 0.2774(8) 0.0866(3) 0.2852(3) 0.024(2) Uani 1 d . . 
O1A O 0.1610(5) 0.0649(2) 0.3007(2) 0.0285(12) Uani 1 d . . 
C2A C 0.4133(7) 0.0629(3) 0.2984(3) 0.024(2) Uani 1 d . . 
O2A O 0.4574(5) 0.0163(2) 0.3284(2) 0.0300(12) Uani 1 d . . 
C3A C 0.4745(7) 0.1188(3) 0.2595(3) 0.023(2) Uani 1 d . . 
O3A O 0.5950(5) 0.1385(2) 0.2424(2) 0.0261(12) Uani 1 d . . 
C4A C 0.3434(8) 0.1408(3) 0.2485(3) 0.024(2) Uani 1 d . . 
C5A C 0.2965(8) 0.1959(3) 0.2138(3) 0.026(2) Uani 1 d . . 
C6A C 0.3906(7) 0.2412(3) 0.1811(3) 0.026(2) Uani 1 d . . 
H6AA H 0.4858(7) 0.2355(3) 0.1812(3) 0.032 Uiso 1 calc R . 
C7A C 0.3420(8) 0.2935(3) 0.1496(3) 0.030(2) Uani 1 d . . 
H7AA H 0.4046(8) 0.3239(3) 0.1274(3) 0.036 Uiso 1 calc R . 
C8A C 0.2021(8) 0.3030(3) 0.1492(3) 0.028(2) Uani 1 d . . 
C9A C 0.1109(8) 0.2590(3) 0.1798(3) 0.026(2) Uani 1 d . . 
H9AA H 0.0160(8) 0.2648(3) 0.1787(3) 0.031 Uiso 1 calc R . 
C10A C 0.1583(8) 0.2062(3) 0.2123(3) 0.028(2) Uani 1 d . . 
H10A H 0.0945(8) 0.1761(3) 0.2341(3) 0.033 Uiso 1 calc R . 
O11A O 0.1693(5) 0.3575(2) 0.1164(2) 0.0325(13) Uani 1 d . . 
C12A C 0.0242(9) 0.3690(4) 0.1145(4) 0.040(2) Uani 1 d . . 
H12A H 0.0123(9) 0.4090(4) 0.0900(4) 0.059 Uiso 1 calc R . 
H12B H -0.0217(9) 0.3609(4) 0.1501(4) 0.059 Uiso 1 calc R . 
H12C H -0.0153(9) 0.3447(4) 0.1021(4) 0.059 Uiso 1 calc R . 
C1B C 0.7659(7) 0.2473(3) 0.2955(3) 0.025(2) Uani 1 d . . 
O1B O 0.7375(5) 0.2788(2) 0.3170(2) 0.0268(12) Uani 1 d . . 
C2B C 0.7734(8) 0.2540(3) 0.2396(3) 0.027(2) Uani 1 d . . 
O2B O 0.7527(6) 0.2922(2) 0.1961(2) 0.0341(13) Uani 1 d . . 
C3B C 0.8168(7) 0.1939(3) 0.2604(3) 0.026(2) Uani 1 d . . 
O3B O 0.8564(5) 0.1617(2) 0.2402(2) 0.0289(12) Uani 1 d . . 
C4B C 0.8018(7) 0.1887(3) 0.3131(3) 0.027(2) Uani 1 d . . 
C5B C 0.8137(8) 0.1422(3) 0.3641(3) 0.025(2) Uani 1 d . . 
C6B C 0.8450(8) 0.0880(3) 0.3682(3) 0.032(2) Uani 1 d . . 
H6BA H 0.8612(8) 0.0830(3) 0.3369(3) 0.038 Uiso 1 calc R . 
C7B C 0.8527(9) 0.0418(4) 0.4170(3) 0.039(2) Uani 1 d . . 
H7BA H 0.8760(9) 0.0055(4) 0.4192(3) 0.046 Uiso 1 calc R . 
C8B C 0.8260(9) 0.0489(4) 0.4630(3) 0.036(2) Uani 1 d . . 
C9B C 0.7951(9) 0.1031(3) 0.4602(3) 0.034(2) Uani 1 d . . 
H9BA H 0.7782(9) 0.1080(3) 0.4915(3) 0.040 Uiso 1 calc R . 
C10B C 0.7901(8) 0.1489(3) 0.4107(3) 0.029(2) Uani 1 d . . 
H10B H 0.7703(8) 0.1856(3) 0.4083(3) 0.035 Uiso 1 calc R . 
O11B O 0.8309(7) 0.0010(2) 0.5095(2) 0.045(2) Uani 1 d . . 
C12B C 0.8164(11) 0.0071(4) 0.5574(3) 0.046(2) Uani 1 d . . 
H12D H 0.8217(11) -0.0303(4) 0.5878(3) 0.069 Uiso 1 calc R . 
H12E H 0.7281(11) 0.0238(4) 0.5619(3) 0.069 Uiso 1 calc R . 
H12F H 0.8896(11) 0.0321(4) 0.5552(3) 0.069 Uiso 1 calc R . 
C1C C 1.1053(8) 0.1648(3) 0.1221(3) 0.028(2) Uani 1 d . . 
O1C O 0.9785(5) 0.1658(2) 0.1324(2) 0.0275(12) Uani 1 d . . 
C2C C 1.2105(8) 0.1202(3) 0.1420(3) 0.029(2) Uani 1 d . . 
O2C O 1.2079(6) 0.0692(2) 0.1733(2) 0.040(2) Uani 1 d . . 
C3C C 1.3177(8) 0.1648(3) 0.1073(3) 0.027(2) Uani 1 d . . 
O3C O 1.4438(5) 0.1659(2) 0.1000(2) 0.0302(13) Uani 1 d . . 
C4C C 1.2124(7) 0.2056(3) 0.0877(3) 0.023(2) Uani 1 d . . 
C5C C 1.2120(7) 0.2640(3) 0.0489(3) 0.023(2) Uani 1 d . . 
C6C C 1.3358(8) 0.2945(3) 0.0237(3) 0.026(2) Uani 1 d . . 
H6CA H 1.4194(8) 0.2761(3) 0.0331(3) 0.031 Uiso 1 calc R . 
C7C C 1.3377(8) 0.3503(3) -0.0141(3) 0.027(2) Uani 1 d . . 
H7CA H 1.4222(8) 0.3699(3) -0.0312(3) 0.032 Uiso 1 calc R . 
C8C C 1.2165(8) 0.3781(3) -0.0276(3) 0.027(2) Uani 1 d . . 
C9C C 1.0912(8) 0.3493(3) -0.0025(3) 0.029(2) Uani 1 d . . 
H9CA H 1.0078(8) 0.3680(3) -0.0115(3) 0.035 Uiso 1 calc R . 
C10C C 1.0915(8) 0.2932(3) 0.0353(3) 0.026(2) Uani 1 d . . 
H10C H 1.0069(8) 0.2739(3) 0.0528(3) 0.031 Uiso 1 calc R . 
O11C O 1.2282(5) 0.4334(2) -0.0660(2) 0.0355(14) Uani 1 d . . 
C12C C 1.1057(9) 0.4661(4) -0.0773(4) 0.044(2) Uani 1 d . . 
H12G H 1.1292(9) 0.5047(4) -0.1055(4) 0.066 Uiso 1 calc R . 
H12H H 1.0615(9) 0.4681(4) -0.0451(4) 0.066 Uiso 1 calc R . 
H12I H 1.0435(9) 0.4478(4) -0.0889(4) 0.066 Uiso 1 calc R . 
C1D C 0.7486(8) 0.2344(3) 0.0034(3) 0.029(2) Uani 1 d . . 
O1D O 0.7554(7) 0.2468(2) -0.0448(2) 0.042(2) Uani 1 d . . 
C2D C 0.7612(8) 0.1795(3) 0.0517(3) 0.031(2) Uani 1 d . . 
O2D O 0.7911(7) 0.1306(2) 0.0606(2) 0.044(2) Uani 1 d . . 
C3D C 0.7294(7) 0.2118(3) 0.0836(3) 0.023(2) Uani 1 d . . 
O3D O 0.7153(5) 0.1988(2) 0.1316(2) 0.0251(12) Uani 1 d . . 
C4D C 0.7259(7) 0.2637(3) 0.0356(3) 0.026(2) Uani 1 d . . 
C5D C 0.7111(8) 0.3213(3) 0.0276(3) 0.026(2) Uani 1 d . . 
C6D C 0.6995(8) 0.3333(3) 0.0713(3) 0.031(2) Uani 1 d . . 
H6DA H 0.6991(8) 0.3029(3) 0.1060(3) 0.037 Uiso 1 calc R . 
C7D C 0.6888(9) 0.3881(4) 0.0643(3) 0.036(2) Uani 1 d . . 
H7DA H 0.6817(9) 0.3953(4) 0.0943(3) 0.043 Uiso 1 calc R . 
C8D C 0.6881(9) 0.4331(4) 0.0141(3) 0.035(2) Uani 1 d . . 
C9D C 0.7021(8) 0.4227(3) -0.0295(3) 0.032(2) Uani 1 d . . 
H9DA H 0.7048(8) 0.4538(3) -0.0640(3) 0.038 Uiso 1 calc R . 
C10D C 0.7122(8) 0.3678(3) -0.0242(3) 0.031(2) Uani 1 d . . 
H10D H 0.7197(8) 0.3611(3) -0.0546(3) 0.038 Uiso 1 calc R . 
O11D O 0.6777(7) 0.4863(2) 0.0116(2) 0.047(2) Uani 1 d . . 
C12D C 0.6716(11) 0.5331(4) -0.0389(4) 0.054(3) Uani 1 d . . 
H12J H 0.6644(11) 0.5684(4) -0.0353(4) 0.081 Uiso 1 calc R . 
H12K H 0.5919(11) 0.5286(4) -0.0532(4) 0.081 Uiso 1 calc R . 
H12L H 0.7544(11) 0.5348(4) -0.0630(4) 0.081 Uiso 1 calc R . 
C1E C 1.2928(8) 0.3898(3) 0.2094(3) 0.027(2) Uani 1 d . . 
O1E O 1.4140(5) 0.4038(2) 0.1929(2) 0.0321(13) Uani 1 d . . 
C2E C 1.1594(8) 0.4220(3) 0.1975(3) 0.027(2) Uani 1 d . . 
O2E O 1.1260(5) 0.4710(2) 0.1702(2) 0.0317(13) Uani 1 d . . 
C3E C 1.0879(8) 0.3685(3) 0.2365(3) 0.025(2) Uani 1 d . . 
O3E O 0.9644(5) 0.3541(2) 0.2541(2) 0.0288(12) Uani 1 d . . 
C4E C 1.2142(8) 0.3393(3) 0.2470(3) 0.026(2) Uani 1 d . . 
C5E C 1.2491(8) 0.2820(3) 0.2837(3) 0.026(2) Uani 1 d . . 
C6E C 1.1448(8) 0.2405(3) 0.3134(3) 0.029(2) Uani 1 d . . 
H6EA H 1.0523(8) 0.2504(3) 0.3095(3) 0.035 Uiso 1 calc R . 
C7E C 1.1763(8) 0.1860(3) 0.3479(3) 0.029(2) Uani 1 d . . 
H7EA H 1.1057(8) 0.1583(3) 0.3678(3) 0.035 Uiso 1 calc R . 
C8E C 1.3105(8) 0.1716(3) 0.3535(3) 0.028(2) Uani 1 d . . 
C9E C 1.4149(8) 0.2122(3) 0.3249(3) 0.030(2) Uani 1 d . . 
H9EA H 1.5071(8) 0.2025(3) 0.3295(3) 0.035 Uiso 1 calc R . 
C10E C 1.3829(8) 0.2663(3) 0.2902(3) 0.031(2) Uani 1 d . . 
H10E H 1.4541(8) 0.2937(3) 0.2701(3) 0.038 Uiso 1 calc R . 
O11E O 1.3321(6) 0.1163(2) 0.3873(2) 0.0336(13) Uani 1 d . . 
C12E C 1.4694(9) 0.0991(4) 0.3969(4) 0.040(2) Uani 1 d . . 
H12M H 1.4693(9) 0.0585(4) 0.4219(4) 0.060 Uiso 1 calc R . 
H12N H 1.5062(9) 0.1212(4) 0.4122(4) 0.060 Uiso 1 calc R . 
H12O H 1.5260(9) 0.1059(4) 0.3634(4) 0.060 Uiso 1 calc R . 
C1F C 1.2286(8) 0.3631(3) 0.3567(3) 0.027(2) Uani 1 d . . 
O1F O 1.3525(5) 0.3740(2) 0.3515(2) 0.0340(14) Uani 1 d . . 
C2F C 1.1122(7) 0.3970(3) 0.3316(3) 0.025(2) Uani 1 d . . 
O2F O 1.0974(6) 0.4463(2) 0.2982(2) 0.0335(13) Uani 1 d . . 
C3F C 1.0251(7) 0.3451(3) 0.3629(3) 0.025(2) Uani 1 d . . 
O3F O 0.9029(5) 0.3331(2) 0.3640(2) 0.0301(13) Uani 1 d . . 
C4F C 1.1405(7) 0.3139(3) 0.3880(3) 0.025(2) Uani 1 d . . 
C5F C 1.1631(8) 0.2569(3) 0.4265(3) 0.026(2) Uani 1 d . . 
C6F C 1.0589(8) 0.2171(3) 0.4566(3) 0.032(2) Uani 1 d . . 
H6FA H 0.9676(8) 0.2271(3) 0.4506(3) 0.039 Uiso 1 calc R . 
C7F C 1.0844(9) 0.1644(4) 0.4944(3) 0.036(2) Uani 1 d . . 
H7FA H 1.0115(9) 0.1382(4) 0.5152(3) 0.043 Uiso 1 calc R . 
C8F C 1.2209(9) 0.1485(3) 0.5025(3) 0.031(2) Uani 1 d . . 
C9F C 1.3267(9) 0.1856(4) 0.4718(3) 0.034(2) Uani 1 d . . 
H9FA H 1.4184(9) 0.1745(4) 0.4760(3) 0.040 Uiso 1 calc R . 
C10F C 1.2972(8) 0.2400(3) 0.4344(3) 0.028(2) Uani 1 d . . 
H10F H 1.3699(8) 0.2663(3) 0.4137(3) 0.034 Uiso 1 calc R . 
O11F O 1.2340(6) 0.0945(2) 0.5421(2) 0.0398(15) Uani 1 d . . 
C12F C 1.3711(10) 0.0735(4) 0.5482(4) 0.048(2) Uani 1 d . . 
H12P H 1.3677(10) 0.0348(4) 0.5775(4) 0.071 Uiso 1 calc R . 
H12Q H 1.4240(10) 0.0985(4) 0.5560(4) 0.071 Uiso 1 calc R . 
H12R H 1.4144(10) 0.0731(4) 0.5152(4) 0.071 Uiso 1 calc R . 
Tb3 Tb 0.74266(4) 0.115156(15) 0.697297(14) 0.02068(9) Uani 1 d . . 
O31 O 0.5469(5) 0.0889(2) 0.6720(2) 0.0284(12) Uani 1 d . . 
O32 O 0.6638(6) 0.0267(2) 0.7699(2) 0.043(2) Uani 1 d . . 
O33 O 0.9304(5) 0.0612(2) 0.7399(2) 0.0255(12) Uani 1 d . . 
O34 O 0.8246(5) 0.0549(2) 0.6553(2) 0.0296(12) Uani 1 d . . 
Tb4 Tb 0.75623(4) 0.380953(15) 0.787827(14) 0.02226(9) Uani 1 d . . 
O41 O 0.7064(6) 0.4347(2) 0.8388(2) 0.0353(13) Uani 1 d . . 
O42 O 0.9526(5) 0.4404(2) 0.7778(2) 0.0270(12) Uani 1 d . . 
O43 O 0.6479(5) 0.3778(2) 0.7188(2) 0.0304(12) Uani 1 d . . 
O44 O 0.8628(6) 0.3289(2) 0.8632(2) 0.0335(13) Uani 1 d . . 
O45 O 0.7081(6) 0.4747(2) 0.7239(2) 0.0402(15) Uani 1 d . . 
C1G C 0.2330(7) 0.0872(3) 0.7854(3) 0.024(2) Uani 1 d . . 
O1G O 0.1159(5) 0.0667(2) 0.7994(2) 0.0269(12) Uani 1 d . . 
C2G C 0.3689(8) 0.0629(3) 0.7988(3) 0.024(2) Uani 1 d . . 
O2G O 0.4125(5) 0.0162(2) 0.8283(2) 0.0297(12) Uani 1 d . . 
C3G C 0.4307(7) 0.1193(3) 0.7596(3) 0.022(2) Uani 1 d . . 
O3G O 0.5500(5) 0.1388(2) 0.7435(2) 0.0260(12) Uani 1 d . . 
C4G C 0.2969(7) 0.1412(3) 0.7492(3) 0.022(2) Uani 1 d . . 
C5G C 0.2545(7) 0.1967(3) 0.7130(3) 0.024(2) Uani 1 d . . 
C6G C 0.3486(7) 0.2417(3) 0.6809(3) 0.025(2) Uani 1 d . . 
H6GA H 0.4433(7) 0.2354(3) 0.6819(3) 0.030 Uiso 1 calc R . 
C7G C 0.3051(8) 0.2941(4) 0.6484(3) 0.030(2) Uani 1 d . . 
H7GA H 0.3694(8) 0.3241(4) 0.6268(3) 0.036 Uiso 1 calc R . 
C8G C 0.1649(8) 0.3039(3) 0.6467(3) 0.028(2) Uani 1 d . . 
C9G C 0.0710(8) 0.2603(3) 0.6770(3) 0.028(2) Uani 1 d . . 
H9GA H -0.0235(8) 0.2666(3) 0.6749(3) 0.033 Uiso 1 calc R . 
C10G C 0.1165(8) 0.2068(3) 0.7107(3) 0.027(2) Uani 1 d . . 
H10G H 0.0521(8) 0.1769(3) 0.7324(3) 0.032 Uiso 1 calc R . 
O11G O 0.1329(6) 0.3581(2) 0.6133(2) 0.0345(13) Uani 1 d . . 
C12G C -0.0106(8) 0.3706(4) 0.6095(3) 0.039(2) Uani 1 d . . 
H12S H -0.0200(8) 0.4106(4) 0.5845(3) 0.059 Uiso 1 calc R . 
H12T H -0.0590(8) 0.3632(4) 0.6446(3) 0.059 Uiso 1 calc R . 
H12U H -0.0494(8) 0.3463(4) 0.5970(3) 0.059 Uiso 1 calc R . 
C1H C 0.7404(7) 0.2466(3) 0.7961(3) 0.024(2) Uani 1 d . . 
O1H O 0.7233(5) 0.2794(2) 0.8171(2) 0.0269(12) Uani 1 d . . 
C2H C 0.7418(7) 0.2534(3) 0.7404(3) 0.025(2) Uani 1 d . . 
O2H O 0.7191(6) 0.2915(2) 0.6974(2) 0.0337(13) Uani 1 d . . 
C3H C 0.7800(7) 0.1925(3) 0.7627(3) 0.025(2) Uani 1 d . . 
O3H O 0.8134(5) 0.1597(2) 0.7420(2) 0.0306(13) Uani 1 d . . 
C4H C 0.7709(7) 0.1876(3) 0.8139(3) 0.024(2) Uani 1 d . . 
C5H C 0.7856(7) 0.1402(3) 0.8650(3) 0.026(2) Uani 1 d . . 
C6H C 0.8046(8) 0.0852(3) 0.8696(3) 0.031(2) Uani 1 d . . 
H6HA H 0.8079(8) 0.0791(3) 0.8391(3) 0.037 Uiso 1 calc R . 
C7H C 0.8186(9) 0.0399(4) 0.9179(3) 0.036(2) Uani 1 d . . 
H7HA H 0.8296(9) 0.0026(4) 0.9209(3) 0.043 Uiso 1 calc R . 
C8H C 0.8164(8) 0.0491(3) 0.9621(3) 0.032(2) Uani 1 d . . 
C9H C 0.7992(8) 0.1026(3) 0.9586(3) 0.032(2) Uani 1 d . . 
H9HA H 0.7982(8) 0.1083(3) 0.9892(3) 0.038 Uiso 1 calc R . 
C10H C 0.7836(7) 0.1476(3) 0.9106(3) 0.028(2) Uani 1 d . . 
H10H H 0.7710(7) 0.1846(3) 0.9083(3) 0.033 Uiso 1 calc R . 
O11H O 0.8304(6) 0.0008(2) 1.0081(2) 0.0402(15) Uani 1 d . . 
C12H C 0.8445(10) 0.0074(4) 1.0542(3) 0.042(2) Uani 1 d . . 
H12V H 0.8536(10) -0.0301(4) 1.0841(3) 0.063 Uiso 1 calc R . 
H12W H 0.7638(10) 0.0259(4) 1.0631(3) 0.063 Uiso 1 calc R . 
H12X H 0.9257(10) 0.0309(4) 1.0470(3) 0.063 Uiso 1 calc R . 
C1I C 1.0609(8) 0.1649(3) 0.6222(3) 0.024(2) Uani 1 d . . 
O1I O 0.9340(5) 0.1669(2) 0.6318(2) 0.0245(11) Uani 1 d . . 
C2I C 1.1642(8) 0.1200(3) 0.6426(3) 0.024(2) Uani 1 d . . 
O2I O 1.1593(6) 0.0689(2) 0.6739(2) 0.0374(14) Uani 1 d . . 
C3I C 1.2726(8) 0.1636(3) 0.6073(3) 0.026(2) Uani 1 d . . 
O3I O 1.3987(5) 0.1632(2) 0.6006(2) 0.0321(13) Uani 1 d . . 
C4I C 1.1663(7) 0.2048(3) 0.5876(3) 0.023(2) Uani 1 d . . 
C5I C 1.1754(7) 0.2641(3) 0.5481(3) 0.024(2) Uani 1 d . . 
C6I C 1.3041(8) 0.2901(3) 0.5242(3) 0.028(2) Uani 1 d . . 
H6IA H 1.3841(8) 0.2688(3) 0.5338(3) 0.034 Uiso 1 calc R . 
C7I C 1.3146(8) 0.3467(3) 0.4867(3) 0.032(2) Uani 1 d . . 
H7IA H 1.4016(8) 0.3647(3) 0.4716(3) 0.038 Uiso 1 calc R . 
C8I C 1.1967(9) 0.3774(3) 0.4710(3) 0.032(2) Uani 1 d . . 
C9I C 1.0707(8) 0.3517(4) 0.4929(3) 0.031(2) Uani 1 d . . 
H9IA H 0.9913(8) 0.3727(4) 0.4816(3) 0.038 Uiso 1 calc R . 
C10I C 1.0584(8) 0.2951(3) 0.5314(3) 0.028(2) Uani 1 d . . 
H10I H 0.9709(8) 0.2776(3) 0.5463(3) 0.033 Uiso 1 calc R . 
O11I O 1.2221(6) 0.4327(2) 0.4336(2) 0.0366(14) Uani 1 d . . 
C12I C 1.1074(10) 0.4686(4) 0.4183(4) 0.049(3) Uani 1 d . . 
H12Y H 1.1390(10) 0.5068(4) 0.3915(4) 0.074 Uiso 1 calc R . 
H12Z H 1.0567(10) 0.4707(4) 0.4495(4) 0.074 Uiso 1 calc R . 
H13A H 1.0479(10) 0.4527(4) 0.4035(4) 0.074 Uiso 1 calc R . 
C1J C 0.6809(8) 0.2348(3) 0.5036(3) 0.029(2) Uani 1 d . . 
O1J O 0.6704(6) 0.2470(2) 0.4576(2) 0.0386(14) Uani 1 d . . 
C2J C 0.6997(8) 0.1794(3) 0.5519(3) 0.031(2) Uani 1 d . . 
O2J O 0.7274(6) 0.1309(2) 0.5612(2) 0.0370(14) Uani 1 d . . 
C3J C 0.6803(7) 0.2128(3) 0.5836(3) 0.023(2) Uani 1 d . . 
O3J O 0.6708(5) 0.1997(2) 0.6323(2) 0.0267(12) Uani 1 d . . 
C4J C 0.6773(7) 0.2647(3) 0.5360(3) 0.025(2) Uani 1 d . . 
C5J C 0.6731(7) 0.3231(3) 0.5280(3) 0.026(2) Uani 1 d . . 
C6J C 0.6577(8) 0.3339(3) 0.5725(3) 0.032(2) Uani 1 d . . 
H6JA H 0.6476(8) 0.3029(3) 0.6072(3) 0.038 Uiso 1 calc R . 
C7J C 0.6570(9) 0.3884(3) 0.5663(3) 0.036(2) Uani 1 d . . 
H7JA H 0.6466(9) 0.3951(3) 0.5967(3) 0.043 Uiso 1 calc R . 
C8J C 0.6718(8) 0.4348(3) 0.5151(3) 0.033(2) Uani 1 d . . 
C9J C 0.6911(8) 0.4253(3) 0.4704(3) 0.031(2) Uani 1 d . . 
H9JA H 0.7040(8) 0.4564(3) 0.4358(3) 0.037 Uiso 1 calc R . 
C10J C 0.6914(8) 0.3691(3) 0.4773(3) 0.031(2) Uani 1 d . . 
H10J H 0.7042(8) 0.3623(3) 0.4470(3) 0.037 Uiso 1 calc R . 
O11J O 0.6691(7) 0.4873(2) 0.5138(2) 0.048(2) Uani 1 d . . 
C12J C 0.6892(12) 0.5355(4) 0.4626(4) 0.054(3) Uani 1 d . . 
H13B H 0.6852(12) 0.5705(4) 0.4667(4) 0.081 Uiso 1 calc R . 
H13C H 0.6178(12) 0.5357(4) 0.4422(4) 0.081 Uiso 1 calc R . 
H13D H 0.7785(12) 0.5334(4) 0.4437(4) 0.081 Uiso 1 calc R . 
C1K C 1.2674(8) 0.3907(3) 0.7065(3) 0.026(2) Uani 1 d . . 
O1K O 1.3919(5) 0.4034(2) 0.6922(2) 0.0338(13) Uani 1 d . . 
C2K C 1.1416(8) 0.4226(3) 0.6900(3) 0.027(2) Uani 1 d . . 
O2K O 1.1135(5) 0.4709(2) 0.6601(2) 0.0333(13) Uani 1 d . . 
C3K C 1.0643(8) 0.3687(3) 0.7287(3) 0.023(2) Uani 1 d . . 
O3K O 0.9395(5) 0.3558(2) 0.7418(2) 0.0250(11) Uani 1 d . . 
C4K C 1.1873(7) 0.3405(3) 0.7433(3) 0.024(2) Uani 1 d . . 
C5K C 1.2185(7) 0.2835(3) 0.7819(3) 0.025(2) Uani 1 d . . 
C6K C 1.1148(8) 0.2437(3) 0.8146(3) 0.029(2) Uani 1 d . . 
H6KA H 1.0224(8) 0.2545(3) 0.8123(3) 0.035 Uiso 1 calc R . 
C7K C 1.1441(8) 0.1898(4) 0.8494(3) 0.033(2) Uani 1 d . . 
H7KA H 1.0719(8) 0.1636(4) 0.8709(3) 0.040 Uiso 1 calc R . 
C8K C 1.2782(8) 0.1725(3) 0.8540(3) 0.029(2) Uani 1 d . . 
C9K C 1.3830(8) 0.2117(3) 0.8228(3) 0.029(2) Uani 1 d . . 
H9KA H 1.4750(8) 0.2008(3) 0.8260(3) 0.035 Uiso 1 calc R . 
C10K C 1.3538(8) 0.2666(3) 0.7871(3) 0.027(2) Uani 1 d . . 
H10K H 1.4261(8) 0.2930(3) 0.7661(3) 0.033 Uiso 1 calc R . 
O11K O 1.2960(6) 0.1183(2) 0.8888(2) 0.0389(14) Uani 1 d . . 
C12K C 1.4326(9) 0.0994(4) 0.8966(4) 0.041(2) Uani 1 d . . 
H13E H 1.4304(9) 0.0592(4) 0.9229(4) 0.062 Uiso 1 calc R . 
H13F H 1.4768(9) 0.1223(4) 0.9093(4) 0.062 Uiso 1 calc R . 
H13G H 1.4838(9) 0.1037(4) 0.8628(4) 0.062 Uiso 1 calc R . 
C1L C 0.4151(8) 0.3630(3) 0.8410(3) 0.028(2) Uani 1 d . . 
O1L O 0.5421(6) 0.3574(2) 0.8326(2) 0.0379(14) Uani 1 d . . 
C2L C 0.3228(8) 0.4087(4) 0.8171(3) 0.029(2) Uani 1 d . . 
O2L O 0.3293(6) 0.4579(2) 0.7812(2) 0.0396(15) Uani 1 d . . 
C3L C 0.2104(7) 0.3707(3) 0.8557(3) 0.026(2) Uani 1 d . . 
O3L O 0.0864(5) 0.3780(2) 0.8628(2) 0.0340(13) Uani 1 d . . 
C4L C 0.3065(7) 0.3267(3) 0.8771(3) 0.026(2) Uani 1 d . . 
C5L C 0.3044(7) 0.2681(3) 0.9170(3) 0.026(2) Uani 1 d . . 
C6L C 0.1831(8) 0.2367(3) 0.9440(3) 0.028(2) Uani 1 d . . 
H6LA H 0.0983(8) 0.2539(3) 0.9350(3) 0.033 Uiso 1 calc R . 
C7L C 0.1845(9) 0.1813(4) 0.9833(3) 0.032(2) Uani 1 d . . 
H7LA H 0.1013(9) 0.1608(4) 1.0008(3) 0.038 Uiso 1 calc R . 
C8L C 0.3070(9) 0.1557(3) 0.9971(3) 0.035(2) Uani 1 d . . 
C9L C 0.4306(9) 0.1859(4) 0.9701(3) 0.033(2) Uani 1 d . . 
H9LA H 0.5153(9) 0.1684(4) 0.9789(3) 0.040 Uiso 1 calc R . 
C10L C 0.4272(8) 0.2413(4) 0.9305(3) 0.031(2) Uani 1 d . . 
H10L H 0.5104(8) 0.2615(4) 0.9121(3) 0.038 Uiso 1 calc R . 
O11L O 0.3000(6) 0.1011(2) 1.0365(2) 0.0405(15) Uani 1 d . . 
C12L C 0.4249(10) 0.0725(4) 1.0507(4) 0.047(2) Uani 1 d . . 
H13H H 0.4049(10) 0.0339(4) 1.0793(4) 0.071 Uiso 1 calc R . 
H13I H 0.4782(10) 0.0935(4) 1.0627(4) 0.071 Uiso 1 calc R . 
H13J H 0.4772(10) 0.0705(4) 1.0196(4) 0.071 Uiso 1 calc R . 
O50 O 1.5231(6) 0.5102(2) 0.6464(2) 0.0391(14) Uani 1 d . . 
O60 O 0.4805(7) 0.4832(3) 0.8645(3) 0.060(2) Uani 1 d . . 
  
loop_ 
 _atom_site_aniso_label 
 _atom_site_aniso_U_11 
 _atom_site_aniso_U_22 
 _atom_site_aniso_U_33 
 _atom_site_aniso_U_23 
 _atom_site_aniso_U_13 
 _atom_site_aniso_U_12 
Tb1 0.0211(2) 0.0184(2) 0.0213(2) -0.0070(2) -0.00511(14) 0.00195(13) 
O11 0.031(3) 0.033(3) 0.035(3) -0.015(3) -0.015(2) 0.002(2) 
O12 0.031(3) 0.028(3) 0.048(4) 0.007(3) 0.001(3) 0.009(2) 
O13 0.026(3) 0.026(3) 0.029(3) -0.007(2) -0.008(2) 0.005(2) 
O14 0.034(3) 0.032(3) 0.024(3) -0.013(2) -0.009(2) 0.003(2) 
Tb2 0.0195(2) 0.0205(2) 0.0229(2) -0.0079(2) -0.00455(14) 0.00130(14) 
O21 0.028(3) 0.024(3) 0.031(3) -0.004(2) -0.004(2) 0.002(2) 
O22 0.031(3) 0.030(3) 0.031(3) -0.014(3) -0.008(2) 0.001(2) 
O23 0.027(3) 0.025(3) 0.036(3) -0.010(3) -0.010(2) 0.006(2) 
O24 0.042(3) 0.039(3) 0.029(3) -0.018(3) -0.016(3) 0.010(3) 
O25 0.025(3) 0.031(3) 0.026(3) -0.008(2) -0.005(2) 0.003(2) 
C1A 0.026(4) 0.024(4) 0.023(4) -0.014(3) 0.002(3) -0.003(3) 
O1A 0.022(3) 0.028(3) 0.030(3) -0.009(2) -0.002(2) -0.001(2) 
C2A 0.025(4) 0.024(4) 0.024(4) -0.014(3) 0.002(3) -0.003(3) 
O2A 0.028(3) 0.022(3) 0.034(3) -0.007(3) -0.006(2) 0.001(2) 
C3A 0.023(4) 0.021(4) 0.028(4) -0.014(3) -0.005(3) 0.005(3) 
O3A 0.024(3) 0.027(3) 0.029(3) -0.013(2) -0.005(2) -0.001(2) 
C4A 0.027(4) 0.026(4) 0.022(4) -0.015(3) -0.003(3) 0.003(3) 
C5A 0.028(4) 0.026(4) 0.024(4) -0.010(3) -0.008(3) 0.005(3) 
C6A 0.018(4) 0.027(4) 0.031(4) -0.010(4) -0.002(3) -0.004(3) 
C7A 0.026(4) 0.028(4) 0.028(4) -0.005(4) -0.002(3) -0.007(3) 
C8A 0.028(4) 0.029(4) 0.023(4) -0.009(4) -0.003(3) 0.004(3) 
C9A 0.023(4) 0.029(4) 0.032(4) -0.019(4) -0.011(3) 0.009(3) 
C10A 0.024(4) 0.025(4) 0.031(4) -0.010(4) -0.004(3) -0.002(3) 
O11A 0.033(3) 0.020(3) 0.033(3) 0.000(2) -0.012(2) 0.003(2) 
C12A 0.037(5) 0.036(5) 0.036(5) -0.007(4) -0.011(4) 0.005(4) 
C1B 0.024(4) 0.025(4) 0.026(4) -0.011(4) -0.002(3) 0.000(3) 
O1B 0.028(3) 0.027(3) 0.024(3) -0.012(2) 0.003(2) -0.004(2) 
C2B 0.024(4) 0.035(5) 0.025(4) -0.017(4) -0.001(3) -0.001(3) 
O2B 0.039(3) 0.039(3) 0.027(3) -0.017(3) -0.007(2) 0.006(3) 
C3B 0.016(4) 0.028(4) 0.035(4) -0.017(4) 0.002(3) -0.002(3) 
O3B 0.022(3) 0.035(3) 0.031(3) -0.017(3) 0.001(2) 0.000(2) 
C4B 0.018(4) 0.032(5) 0.036(4) -0.019(4) 0.000(3) -0.004(3) 
C5B 0.036(4) 0.020(4) 0.017(4) -0.005(3) -0.005(3) -0.002(3) 
C6B 0.038(5) 0.024(4) 0.034(5) -0.015(4) 0.000(4) 0.002(3) 
C7B 0.049(6) 0.024(5) 0.042(5) -0.013(4) -0.009(4) 0.005(4) 
C8B 0.045(5) 0.031(5) 0.027(4) -0.008(4) -0.007(4) -0.002(4) 
C9B 0.046(5) 0.027(5) 0.026(4) -0.010(4) -0.006(4) -0.002(4) 
C10B 0.034(5) 0.022(4) 0.031(4) -0.011(4) -0.007(4) 0.000(3) 
O11B 0.077(5) 0.023(3) 0.030(3) -0.006(3) -0.010(3) -0.002(3) 
C12B 0.079(7) 0.030(5) 0.025(5) -0.005(4) -0.016(5) -0.006(5) 
C1C 0.028(4) 0.034(5) 0.019(4) -0.010(4) -0.003(3) 0.003(3) 
O1C 0.022(3) 0.024(3) 0.028(3) -0.004(2) -0.002(2) 0.002(2) 
C2C 0.024(4) 0.030(5) 0.023(4) -0.005(4) 0.000(3) 0.003(3) 
O2C 0.030(3) 0.034(4) 0.039(3) -0.004(3) -0.001(3) 0.011(3) 
C3C 0.040(5) 0.019(4) 0.018(4) -0.006(3) -0.005(3) 0.001(3) 
O3C 0.021(3) 0.033(3) 0.033(3) -0.013(3) -0.001(2) 0.002(2) 
C4C 0.018(4) 0.027(4) 0.018(4) -0.006(3) 0.002(3) -0.004(3) 
C5C 0.026(4) 0.024(4) 0.017(4) -0.008(3) -0.007(3) 0.010(3) 
C6C 0.025(4) 0.023(4) 0.031(4) -0.012(4) -0.011(3) 0.005(3) 
C7C 0.022(4) 0.025(4) 0.027(4) -0.006(3) -0.006(3) -0.001(3) 
C8C 0.036(4) 0.016(4) 0.024(4) -0.005(3) -0.007(3) 0.000(3) 
C9C 0.026(4) 0.019(4) 0.035(4) -0.004(3) -0.011(3) 0.005(3) 
C10C 0.023(4) 0.026(4) 0.029(4) -0.012(4) -0.006(3) -0.001(3) 
O11C 0.030(3) 0.025(3) 0.043(3) -0.007(3) -0.006(3) 0.000(2) 
C12C 0.042(5) 0.030(5) 0.047(5) -0.005(4) -0.010(4) 0.010(4) 
C1D 0.034(4) 0.025(4) 0.025(4) -0.006(4) -0.012(3) 0.000(3) 
O1D 0.066(4) 0.034(3) 0.023(3) -0.009(3) -0.009(3) -0.005(3) 
C2D 0.039(5) 0.024(5) 0.027(4) -0.007(4) -0.007(4) -0.005(3) 
O2D 0.073(5) 0.026(3) 0.030(3) -0.010(3) -0.011(3) 0.009(3) 
C3D 0.021(4) 0.020(4) 0.025(4) -0.006(3) -0.008(3) 0.005(3) 
O3D 0.030(3) 0.022(3) 0.023(3) -0.010(2) -0.007(2) 0.000(2) 
C4D 0.023(4) 0.020(4) 0.028(4) -0.004(3) -0.009(3) 0.000(3) 
C5D 0.029(4) 0.028(4) 0.022(4) -0.010(3) -0.010(3) 0.002(3) 
C6D 0.039(5) 0.026(5) 0.022(4) -0.005(4) -0.006(3) 0.002(3) 
C7D 0.043(5) 0.030(5) 0.032(5) -0.011(4) -0.004(4) -0.003(4) 
C8D 0.042(5) 0.027(5) 0.032(5) -0.010(4) -0.011(4) -0.002(4) 
C9D 0.030(4) 0.025(4) 0.034(5) -0.006(4) -0.009(4) -0.001(3) 
C10D 0.035(5) 0.028(5) 0.027(4) -0.008(4) -0.008(3) 0.004(3) 
O11D 0.077(5) 0.023(3) 0.041(4) -0.014(3) -0.009(3) 0.003(3) 
C12D 0.072(7) 0.025(5) 0.051(6) -0.007(5) 0.000(5) 0.000(5) 
C1E 0.022(4) 0.028(4) 0.034(4) -0.017(4) -0.003(3) 0.002(3) 
O1E 0.020(3) 0.029(3) 0.039(3) -0.009(3) -0.003(2) 0.000(2) 
C2E 0.029(4) 0.027(5) 0.029(4) -0.018(4) -0.006(3) 0.003(3) 
O2E 0.025(3) 0.029(3) 0.034(3) -0.009(3) -0.004(2) 0.006(2) 
C3E 0.029(4) 0.020(4) 0.024(4) -0.009(3) -0.005(3) 0.001(3) 
O3E 0.021(3) 0.025(3) 0.036(3) -0.012(3) -0.001(2) 0.001(2) 
C4E 0.026(4) 0.032(5) 0.023(4) -0.016(4) -0.002(3) 0.003(3) 
C5E 0.026(4) 0.026(4) 0.026(4) -0.012(3) 0.003(3) -0.004(3) 
C6E 0.027(4) 0.031(5) 0.034(4) -0.017(4) -0.010(3) 0.007(3) 
C7E 0.030(4) 0.027(4) 0.033(4) -0.017(4) -0.001(3) -0.003(3) 
C8E 0.039(5) 0.019(4) 0.025(4) -0.009(3) -0.008(3) 0.003(3) 
C9E 0.021(4) 0.033(5) 0.036(4) -0.015(4) -0.009(3) 0.004(3) 
C10E 0.026(4) 0.026(4) 0.038(5) -0.012(4) -0.001(4) -0.001(3) 
O11E 0.039(3) 0.018(3) 0.035(3) -0.002(2) -0.011(3) 0.001(2) 
C12E 0.043(5) 0.026(5) 0.044(5) -0.009(4) -0.017(4) 0.013(4) 
C1F 0.029(4) 0.029(4) 0.020(4) -0.009(3) -0.008(3) 0.001(3) 
O1F 0.023(3) 0.031(3) 0.034(3) -0.002(3) -0.007(2) -0.002(2) 
C2F 0.022(4) 0.028(4) 0.023(4) -0.009(4) -0.007(3) 0.002(3) 
O2F 0.038(3) 0.021(3) 0.035(3) -0.006(3) -0.011(3) 0.002(2) 
C3F 0.022(4) 0.025(4) 0.025(4) -0.009(3) -0.004(3) 0.002(3) 
O3F 0.024(3) 0.034(3) 0.027(3) -0.008(3) -0.007(2) 0.002(2) 
C4F 0.020(4) 0.031(4) 0.019(4) -0.005(3) -0.006(3) -0.002(3) 
C5F 0.032(4) 0.025(4) 0.022(4) -0.011(3) -0.003(3) 0.000(3) 
C6F 0.032(5) 0.033(5) 0.026(4) -0.008(4) -0.006(3) -0.006(3) 
C7F 0.036(5) 0.034(5) 0.034(5) -0.011(4) -0.003(4) -0.007(4) 
C8F 0.045(5) 0.025(4) 0.030(4) -0.017(4) -0.009(4) 0.006(4) 
C9F 0.034(5) 0.033(5) 0.031(4) -0.010(4) -0.012(4) 0.000(4) 
C10F 0.021(4) 0.030(4) 0.029(4) -0.009(4) -0.003(3) 0.002(3) 
O11F 0.049(4) 0.025(3) 0.036(3) -0.004(3) -0.011(3) 0.005(3) 
C12F 0.062(7) 0.036(5) 0.043(5) -0.014(4) -0.020(5) 0.014(5) 
Tb3 0.0210(2) 0.0185(2) 0.0207(2) -0.0067(2) -0.00549(14) 0.00200(13) 
O31 0.028(3) 0.026(3) 0.034(3) -0.014(3) -0.010(2) -0.004(2) 
O32 0.025(3) 0.031(3) 0.047(4) 0.002(3) 0.000(3) 0.004(2) 
O33 0.030(3) 0.019(3) 0.023(3) -0.006(2) -0.003(2) -0.001(2) 
O34 0.032(3) 0.027(3) 0.034(3) -0.016(3) -0.011(2) 0.005(2) 
Tb4 0.0209(2) 0.0207(2) 0.0236(2) -0.0084(2) -0.00392(14) 0.00122(14) 
O41 0.032(3) 0.044(4) 0.036(3) -0.023(3) -0.002(3) 0.000(3) 
O42 0.024(3) 0.021(3) 0.034(3) -0.011(2) -0.004(2) -0.001(2) 
O43 0.028(3) 0.028(3) 0.038(3) -0.015(3) -0.014(2) 0.005(2) 
O44 0.037(3) 0.031(3) 0.027(3) -0.006(3) -0.012(2) 0.000(2) 
O45 0.048(4) 0.031(3) 0.040(3) -0.012(3) -0.018(3) 0.001(3) 
C1G 0.021(4) 0.027(4) 0.023(4) -0.009(3) -0.004(3) 0.003(3) 
O1G 0.021(3) 0.027(3) 0.031(3) -0.011(2) -0.006(2) -0.002(2) 
C2G 0.027(4) 0.023(4) 0.025(4) -0.013(3) -0.002(3) -0.006(3) 
O2G 0.027(3) 0.023(3) 0.037(3) -0.011(3) -0.008(2) 0.004(2) 
C3G 0.026(4) 0.019(4) 0.020(4) -0.008(3) -0.005(3) 0.004(3) 
O3G 0.025(3) 0.023(3) 0.032(3) -0.013(2) -0.006(2) 0.002(2) 
C4G 0.016(4) 0.025(4) 0.028(4) -0.014(3) -0.006(3) 0.000(3) 
C5G 0.024(4) 0.025(4) 0.021(4) -0.008(3) -0.003(3) 0.002(3) 
C6G 0.020(4) 0.031(4) 0.027(4) -0.015(4) -0.005(3) 0.003(3) 
C7G 0.023(4) 0.035(5) 0.023(4) -0.007(4) -0.003(3) -0.002(3) 
C8G 0.038(5) 0.026(4) 0.021(4) -0.009(3) -0.008(3) 0.002(3) 
C9G 0.022(4) 0.030(4) 0.031(4) -0.014(4) -0.004(3) 0.003(3) 
C10G 0.030(4) 0.025(4) 0.025(4) -0.010(3) -0.003(3) -0.001(3) 
O11G 0.034(3) 0.026(3) 0.034(3) -0.005(3) -0.009(3) 0.007(2) 
C12G 0.034(5) 0.041(5) 0.034(5) -0.009(4) -0.011(4) 0.011(4) 
C1H 0.013(4) 0.034(4) 0.023(4) -0.012(4) -0.001(3) 0.000(3) 
O1H 0.035(3) 0.021(3) 0.023(3) -0.008(2) -0.003(2) 0.002(2) 
C2H 0.022(4) 0.025(4) 0.035(4) -0.020(4) -0.004(3) -0.003(3) 
O2H 0.035(3) 0.034(3) 0.029(3) -0.010(3) -0.009(2) 0.007(2) 
C3H 0.018(4) 0.022(4) 0.035(4) -0.012(4) -0.006(3) 0.004(3) 
O3H 0.023(3) 0.039(3) 0.034(3) -0.021(3) -0.006(2) 0.004(2) 
C4H 0.018(4) 0.021(4) 0.030(4) -0.011(3) -0.003(3) 0.003(3) 
C5H 0.015(4) 0.028(4) 0.033(4) -0.013(4) -0.001(3) 0.001(3) 
C6H 0.035(5) 0.031(5) 0.029(4) -0.015(4) -0.005(3) -0.004(3) 
C7H 0.046(5) 0.027(5) 0.033(5) -0.013(4) -0.002(4) 0.001(4) 
C8H 0.034(5) 0.026(4) 0.032(4) -0.008(4) -0.012(4) 0.001(3) 
C9H 0.036(5) 0.032(5) 0.033(4) -0.019(4) -0.002(4) -0.002(4) 
C10H 0.022(4) 0.029(4) 0.034(4) -0.017(4) -0.003(3) 0.001(3) 
O11H 0.061(4) 0.027(3) 0.031(3) -0.010(3) -0.012(3) 0.000(3) 
C12H 0.058(6) 0.036(5) 0.026(4) -0.009(4) -0.008(4) 0.002(4) 
C1I 0.030(4) 0.022(4) 0.024(4) -0.014(3) -0.005(3) -0.001(3) 
O1I 0.020(3) 0.020(3) 0.031(3) -0.008(2) -0.007(2) 0.004(2) 
C2I 0.029(4) 0.014(4) 0.029(4) -0.010(3) -0.009(3) 0.010(3) 
O2I 0.030(3) 0.026(3) 0.042(3) -0.005(3) -0.002(3) 0.009(2) 
C3I 0.026(4) 0.032(5) 0.019(4) -0.010(3) -0.005(3) 0.008(3) 
O3I 0.023(3) 0.036(3) 0.030(3) -0.008(3) -0.008(2) 0.003(2) 
C4I 0.022(4) 0.028(4) 0.021(4) -0.013(3) -0.005(3) 0.004(3) 
C5I 0.021(4) 0.027(4) 0.026(4) -0.014(3) -0.005(3) -0.001(3) 
C6I 0.031(4) 0.025(4) 0.034(4) -0.016(4) -0.014(3) 0.006(3) 
C7I 0.030(4) 0.027(5) 0.034(4) -0.012(4) -0.003(4) 0.000(3) 
C8I 0.041(5) 0.025(4) 0.022(4) -0.006(4) 0.000(3) 0.002(4) 
C9I 0.032(5) 0.038(5) 0.027(4) -0.015(4) -0.016(3) 0.010(4) 
C10I 0.029(4) 0.023(4) 0.030(4) -0.011(4) -0.010(3) 0.007(3) 
O11I 0.039(3) 0.027(3) 0.031(3) -0.003(3) -0.003(3) 0.006(2) 
C12I 0.051(6) 0.026(5) 0.052(6) -0.003(4) -0.006(5) 0.012(4) 
C1J 0.027(4) 0.035(5) 0.017(4) -0.006(3) -0.001(3) -0.001(3) 
O1J 0.053(4) 0.035(3) 0.023(3) -0.009(3) -0.007(3) 0.011(3) 
C2J 0.032(5) 0.027(5) 0.026(4) -0.005(4) -0.006(3) 0.001(3) 
O2J 0.052(4) 0.023(3) 0.030(3) -0.007(3) -0.007(3) 0.011(3) 
C3J 0.019(4) 0.027(4) 0.023(4) -0.010(3) -0.005(3) 0.003(3) 
O3J 0.028(3) 0.025(3) 0.023(3) -0.006(2) -0.004(2) 0.000(2) 
C4J 0.019(4) 0.029(4) 0.024(4) -0.010(3) -0.008(3) 0.006(3) 
C5J 0.023(4) 0.029(4) 0.024(4) -0.010(3) -0.008(3) 0.003(3) 
C6J 0.035(5) 0.024(4) 0.027(4) -0.004(4) -0.003(3) 0.001(3) 
C7J 0.054(6) 0.024(5) 0.027(4) -0.007(4) -0.009(4) 0.000(4) 
C8J 0.033(5) 0.025(5) 0.035(5) -0.009(4) -0.002(4) -0.002(3) 
C9J 0.033(5) 0.024(4) 0.029(4) -0.006(4) -0.005(3) -0.002(3) 
C10J 0.030(4) 0.033(5) 0.023(4) -0.006(4) -0.009(3) -0.002(3) 
O11J 0.077(5) 0.024(3) 0.042(4) -0.013(3) -0.009(3) -0.002(3) 
C12J 0.078(8) 0.024(5) 0.049(6) -0.008(5) -0.004(5) -0.001(5) 
C1K 0.027(4) 0.031(4) 0.022(4) -0.014(3) -0.004(3) -0.001(3) 
O1K 0.024(3) 0.031(3) 0.041(3) -0.011(3) -0.003(2) -0.003(2) 
C2K 0.032(4) 0.024(4) 0.026(4) -0.011(4) -0.007(3) 0.003(3) 
O2K 0.029(3) 0.026(3) 0.042(3) -0.011(3) -0.013(3) 0.005(2) 
C3K 0.029(4) 0.024(4) 0.021(4) -0.014(3) -0.006(3) 0.003(3) 
O3K 0.019(3) 0.024(3) 0.035(3) -0.015(2) -0.002(2) -0.004(2) 
C4K 0.022(4) 0.025(4) 0.028(4) -0.015(3) -0.004(3) 0.000(3) 
C5K 0.024(4) 0.022(4) 0.029(4) -0.013(3) -0.007(3) 0.009(3) 
C6K 0.020(4) 0.033(5) 0.029(4) -0.009(4) -0.003(3) 0.000(3) 
C7K 0.032(5) 0.033(5) 0.029(4) -0.011(4) 0.000(4) -0.004(4) 
C8K 0.030(4) 0.027(4) 0.022(4) -0.004(3) -0.007(3) 0.004(3) 
C9K 0.019(4) 0.033(5) 0.033(4) -0.012(4) -0.009(3) 0.002(3) 
C10K 0.024(4) 0.026(4) 0.032(4) -0.013(4) -0.007(3) 0.003(3) 
O11K 0.028(3) 0.033(3) 0.051(4) -0.012(3) -0.013(3) 0.005(2) 
C12K 0.043(5) 0.036(5) 0.042(5) -0.011(4) -0.018(4) 0.005(4) 
C1L 0.021(4) 0.030(4) 0.036(4) -0.017(4) -0.008(3) 0.003(3) 
O1L 0.030(3) 0.036(3) 0.045(3) -0.018(3) 0.000(3) 0.003(2) 
C2L 0.028(4) 0.035(5) 0.027(4) -0.016(4) -0.004(3) 0.000(3) 
O2L 0.040(3) 0.023(3) 0.040(3) -0.002(3) -0.001(3) 0.004(2) 
C3L 0.022(4) 0.025(4) 0.032(4) -0.014(4) -0.003(3) -0.003(3) 
O3L 0.024(3) 0.039(3) 0.034(3) -0.012(3) -0.009(2) 0.002(2) 
C4L 0.022(4) 0.030(4) 0.022(4) -0.010(3) 0.000(3) -0.008(3) 
C5L 0.019(4) 0.034(5) 0.024(4) -0.013(4) -0.008(3) 0.004(3) 
C6L 0.031(4) 0.028(4) 0.025(4) -0.012(4) -0.007(3) 0.000(3) 
C7L 0.035(5) 0.035(5) 0.026(4) -0.013(4) -0.006(3) -0.002(4) 
C8L 0.045(5) 0.027(5) 0.034(5) -0.013(4) -0.015(4) 0.009(4) 
C9L 0.036(5) 0.033(5) 0.033(4) -0.015(4) -0.011(4) 0.008(4) 
C10L 0.024(4) 0.034(5) 0.038(5) -0.017(4) -0.004(3) -0.001(3) 
O11L 0.048(4) 0.024(3) 0.038(3) -0.004(3) -0.007(3) 0.002(3) 
C12L 0.070(7) 0.026(5) 0.037(5) -0.002(4) -0.020(5) 0.005(4) 
O50 0.043(4) 0.029(3) 0.043(3) -0.014(3) -0.011(3) 0.002(3) 
O60 0.046(4) 0.039(4) 0.078(5) -0.019(4) 0.013(4) 0.002(3) 
  
_geom_special_details 
; 
 All esds (except the esd in the dihedral angle between two l.s. planes) 
 are estimated using the full covariance matrix.  The cell esds are taken 
 into account individually in the estimation of esds in distances, angles 
 and torsion angles; correlations between esds in cell parameters are only 
 used when they are defined by crystal symmetry.  An approximate (isotropic) 
 treatment of cell esds is used for estimating esds involving l.s. planes. 
; 
  
loop_ 
 _geom_bond_atom_site_label_1 
 _geom_bond_atom_site_label_2 
 _geom_bond_distance 
 _geom_bond_site_symmetry_2 
 _geom_bond_publ_flag 
Tb1 O3B 2.287(6) . ? 
Tb1 O3D 2.329(5) . ? 
Tb1 O3A 2.374(5) . ? 
Tb1 O12 2.374(5) . ? 
Tb1 O1C 2.402(5) . ? 
Tb1 O11 2.406(5) . ? 
Tb1 O13 2.413(5) . ? 
Tb1 O14 2.433(5) . ? 
Tb2 O3E 2.352(5) . ? 
Tb2 O25 2.358(5) . ? 
Tb2 O1B 2.361(5) . ? 
Tb2 O3F 2.365(5) . ? 
Tb2 O21 2.388(5) . ? 
Tb2 O24 2.421(5) . ? 
Tb2 O23 2.460(5) . ? 
Tb2 O22 2.462(5) . ? 
C1A O1A 1.243(9) . ? 
C1A C4A 1.450(10) . ? 
C1A C2A 1.485(11) . ? 
C2A O2A 1.240(9) . ? 
C2A C3A 1.476(10) . ? 
C3A O3A 1.263(9) . ? 
C3A C4A 1.418(10) . ? 
C4A C5A 1.438(10) . ? 
C5A C10A 1.390(10) . ? 
C5A C6A 1.418(10) . ? 
C6A C7A 1.371(11) . ? 
C7A C8A 1.401(11) . ? 
C8A O11A 1.367(9) . ? 
C8A C9A 1.370(11) . ? 
C9A C10A 1.383(10) . ? 
O11A C12A 1.462(10) . ? 
C1B O1B 1.240(9) . ? 
C1B C4B 1.437(11) . ? 
C1B C2B 1.513(11) . ? 
C2B O2B 1.233(9) . ? 
C2B C3B 1.485(11) . ? 
C3B O3B 1.245(9) . ? 
C3B C4B 1.432(11) . ? 
C4B C5B 1.431(11) . ? 
C5B C6B 1.404(11) . ? 
C5B C10B 1.405(11) . ? 
C6B C7B 1.383(11) . ? 
C7B C8B 1.393(12) . ? 
C8B O11B 1.360(10) . ? 
C8B C9B 1.416(12) . ? 
C9B C10B 1.386(11) . ? 
O11B C12B 1.433(11) . ? 
C1C O1C 1.252(9) . ? 
C1C C4C 1.448(10) . ? 
C1C C2C 1.498(11) . ? 
C2C O2C 1.230(9) . ? 
C2C C3C 1.501(11) . ? 
C3C O3C 1.238(9) . ? 
C3C C4C 1.442(11) . ? 
C4C C5C 1.431(10) . ? 
C5C C10C 1.397(10) . ? 
C5C C6C 1.409(10) . ? 
C6C C7C 1.373(10) . ? 
C7C C8C 1.389(11) . ? 
C8C O11C 1.366(9) . ? 
C8C C9C 1.406(11) . ? 
C9C C10C 1.378(10) . ? 
O11C C12C 1.445(10) . ? 
C1D O1D 1.251(9) . ? 
C1D C4D 1.436(12) . ? 
C1D C2D 1.494(11) . ? 
C2D O2D 1.225(10) . ? 
C2D C3D 1.498(11) . ? 
C3D O3D 1.241(9) . ? 
C3D C4D 1.434(10) . ? 
C4D C5D 1.432(11) . ? 
C5D C6D 1.406(11) . ? 
C5D C10D 1.429(10) . ? 
C6D C7D 1.367(12) . ? 
C7D C8D 1.385(11) . ? 
C8D O11D 1.372(10) . ? 
C8D C9D 1.380(12) . ? 
C9D C10D 1.386(11) . ? 
O11D C12D 1.417(11) . ? 
C1E O1E 1.235(9) . ? 
C1E C4E 1.447(11) . ? 
C1E C2E 1.533(11) . ? 
C2E O2E 1.227(9) . ? 
C2E C3E 1.475(11) . ? 
C3E O3E 1.261(9) . ? 
C3E C4E 1.437(10) . ? 
C4E C5E 1.455(11) . ? 
C5E C10E 1.386(11) . ? 
C5E C6E 1.413(11) . ? 
C6E C7E 1.378(11) . ? 
C7E C8E 1.380(11) . ? 
C8E O11E 1.362(9) . ? 
C8E C9E 1.398(11) . ? 
C9E C10E 1.372(11) . ? 
O11E C12E 1.441(10) . ? 
C1F O1F 1.249(9) . ? 
C1F C4F 1.440(11) . ? 
C1F C2F 1.487(10) . ? 
C2F O2F 1.231(9) . ? 
C2F C3F 1.482(10) . ? 
C3F O3F 1.261(9) . ? 
C3F C4F 1.454(10) . ? 
C4F C5F 1.434(10) . ? 
C5F C6F 1.391(11) . ? 
C5F C10F 1.400(11) . ? 
C6F C7F 1.359(11) . ? 
C7F C8F 1.419(12) . ? 
C8F C9F 1.371(11) . ? 
C8F O11F 1.372(9) . ? 
C9F C10F 1.395(11) . ? 
O11F C12F 1.449(11) . ? 
Tb3 O3H 2.281(6) . ? 
Tb3 O3J 2.322(5) . ? 
Tb3 O32 2.380(5) . ? 
Tb3 O3G 2.383(5) . ? 
Tb3 O31 2.405(5) . ? 
Tb3 O33 2.411(5) . ? 
Tb3 O1I 2.420(5) . ? 
Tb3 O34 2.438(5) . ? 
Tb4 O1L 2.269(5) . ? 
Tb4 O3K 2.333(5) . ? 
Tb4 O44 2.340(5) . ? 
Tb4 O45 2.390(6) . ? 
Tb4 O43 2.413(5) . ? 
Tb4 O1H 2.440(5) . ? 
Tb4 O41 2.443(6) . ? 
Tb4 O42 2.463(5) . ? 
C1G O1G 1.238(9) . ? 
C1G C4G 1.434(10) . ? 
C1G C2G 1.491(10) . ? 
C2G O2G 1.234(9) . ? 
C2G C3G 1.489(10) . ? 
C3G O3G 1.250(9) . ? 
C3G C4G 1.440(10) . ? 
C4G C5G 1.442(10) . ? 
C5G C10G 1.388(10) . ? 
C5G C6G 1.411(10) . ? 
C6G C7G 1.361(11) . ? 
C7G C8G 1.407(11) . ? 
C8G O11G 1.364(9) . ? 
C8G C9G 1.379(11) . ? 
C9G C10G 1.398(11) . ? 
O11G C12G 1.455(10) . ? 
C1H O1H 1.248(9) . ? 
C1H C4H 1.433(11) . ? 
C1H C2H 1.515(11) . ? 
C2H O2H 1.227(9) . ? 
C2H C3H 1.486(10) . ? 
C3H O3H 1.260(9) . ? 
C3H C4H 1.397(11) . ? 
C4H C5H 1.448(10) . ? 
C5H C10H 1.400(11) . ? 
C5H C6H 1.402(11) . ? 
C6H C7H 1.373(11) . ? 
C7H C8H 1.387(12) . ? 
C8H C9H 1.372(12) . ? 
C8H O11H 1.371(9) . ? 
C9H C10H 1.371(11) . ? 
O11H C12H 1.429(10) . ? 
C1I O1I 1.254(9) . ? 
C1I C4I 1.426(10) . ? 
C1I C2I 1.492(10) . ? 
C2I O2I 1.231(9) . ? 
C2I C3I 1.498(11) . ? 
C3I O3I 1.239(9) . ? 
C3I C4I 1.455(10) . ? 
C4I C5I 1.452(10) . ? 
C5I C10I 1.400(10) . ? 
C5I C6I 1.405(10) . ? 
C6I C7I 1.385(11) . ? 
C7I C8I 1.398(11) . ? 
C8I O11I 1.369(9) . ? 
C8I C9I 1.372(11) . ? 
C9I C10I 1.392(11) . ? 
O11I C12I 1.432(10) . ? 
C1J O1J 1.221(9) . ? 
C1J C4J 1.459(11) . ? 
C1J C2J 1.511(11) . ? 
C2J O2J 1.209(10) . ? 
C2J C3J 1.514(12) . ? 
C3J O3J 1.259(9) . ? 
C3J C4J 1.427(10) . ? 
C4J C5J 1.452(11) . ? 
C5J C10J 1.397(10) . ? 
C5J C6J 1.408(11) . ? 
C6J C7J 1.367(12) . ? 
C7J C8J 1.410(11) . ? 
C8J O11J 1.368(10) . ? 
C8J C9J 1.391(12) . ? 
C9J C10J 1.403(12) . ? 
O11J C12J 1.430(11) . ? 
C1K O1K 1.255(9) . ? 
C1K C4K 1.443(10) . ? 
C1K C2K 1.483(11) . ? 
C2K O2K 1.215(9) . ? 
C2K C3K 1.503(11) . ? 
C3K O3K 1.257(9) . ? 
C3K C4K 1.414(10) . ? 
C4K C5K 1.455(10) . ? 
C5K C10K 1.401(10) . ? 
C5K C6K 1.403(11) . ? 
C6K C7K 1.360(11) . ? 
C7K C8K 1.391(11) . ? 
C8K O11K 1.341(9) . ? 
C8K C9K 1.393(11) . ? 
C9K C10K 1.387(11) . ? 
O11K C12K 1.435(10) . ? 
C1L O1L 1.263(9) . ? 
C1L C4L 1.420(10) . ? 
C1L C2L 1.445(11) . ? 
C1L C3L 2.033(11) . ? 
C2L O2L 1.232(9) . ? 
C2L C3L 1.487(10) . ? 
C3L O3L 1.238(9) . ? 
C3L C4L 1.431(11) . ? 
C4L C5L 1.443(11) . ? 
C5L C10L 1.393(11) . ? 
C5L C6L 1.405(11) . ? 
C6L C7L 1.380(11) . ? 
C7L C8L 1.382(11) . ? 
C8L O11L 1.362(10) . ? 
C8L C9L 1.412(12) . ? 
C9L C10L 1.386(11) . ? 
O11L C12L 1.432(11) . ? 
  
loop_ 
 _geom_angle_atom_site_label_1 
 _geom_angle_atom_site_label_2 
 _geom_angle_atom_site_label_3 
 _geom_angle 
 _geom_angle_site_symmetry_1 
 _geom_angle_site_symmetry_3 
 _geom_angle_publ_flag 
O3B Tb1 O3D 91.4(2) . . ? 
O3B Tb1 O3A 70.2(2) . . ? 
O3D Tb1 O3A 76.4(2) . . ? 
O3B Tb1 O12 100.8(2) . . ? 
O3D Tb1 O12 143.2(2) . . ? 
O3A Tb1 O12 75.3(2) . . ? 
O3B Tb1 O1C 82.4(2) . . ? 
O3D Tb1 O1C 70.0(2) . . ? 
O3A Tb1 O1C 135.8(2) . . ? 
O12 Tb1 O1C 145.7(2) . . ? 
O3B Tb1 O11 143.7(2) . . ? 
O3D Tb1 O11 73.9(2) . . ? 
O3A Tb1 O11 74.1(2) . . ? 
O12 Tb1 O11 75.9(2) . . ? 
O1C Tb1 O11 120.8(2) . . ? 
O3B Tb1 O13 74.7(2) . . ? 
O3D Tb1 O13 147.0(2) . . ? 
O3A Tb1 O13 123.8(2) . . ? 
O12 Tb1 O13 69.7(2) . . ? 
O1C Tb1 O13 78.5(2) . . ? 
O11 Tb1 O13 133.4(2) . . ? 
O3B Tb1 O14 141.9(2) . . ? 
O3D Tb1 O14 108.5(2) . . ? 
O3A Tb1 O14 144.9(2) . . ? 
O12 Tb1 O14 82.7(2) . . ? 
O1C Tb1 O14 74.9(2) . . ? 
O11 Tb1 O14 74.2(2) . . ? 
O13 Tb1 O14 71.1(2) . . ? 
O3E Tb2 O25 141.8(2) . . ? 
O3E Tb2 O1B 75.1(2) . . ? 
O25 Tb2 O1B 73.6(2) . . ? 
O3E Tb2 O3F 75.9(2) . . ? 
O25 Tb2 O3F 77.4(2) . . ? 
O1B Tb2 O3F 79.7(2) . . ? 
O3E Tb2 O21 73.8(2) . . ? 
O25 Tb2 O21 142.0(2) . . ? 
O1B Tb2 O21 143.6(2) . . ? 
O3F Tb2 O21 110.2(2) . . ? 
O3E Tb2 O24 79.5(2) . . ? 
O25 Tb2 O24 113.2(2) . . ? 
O1B Tb2 O24 76.3(2) . . ? 
O3F Tb2 O24 149.2(2) . . ? 
O21 Tb2 O24 79.8(2) . . ? 
O3E Tb2 O23 140.6(2) . . ? 
O25 Tb2 O23 74.0(2) . . ? 
O1B Tb2 O23 115.1(2) . . ? 
O3F Tb2 O23 141.6(2) . . ? 
O21 Tb2 O23 79.4(2) . . ? 
O24 Tb2 O23 67.6(2) . . ? 
O3E Tb2 O22 125.9(2) . . ? 
O25 Tb2 O22 72.7(2) . . ? 
O1B Tb2 O22 142.2(2) . . ? 
O3F Tb2 O22 77.0(2) . . ? 
O21 Tb2 O22 73.2(2) . . ? 
O24 Tb2 O22 133.3(2) . . ? 
O23 Tb2 O22 70.5(2) . . ? 
O1A C1A C4A 138.9(7) . . ? 
O1A C1A C2A 132.2(7) . . ? 
C4A C1A C2A 88.9(6) . . ? 
O2A C2A C3A 135.4(7) . . ? 
O2A C2A C1A 136.1(7) . . ? 
C3A C2A C1A 88.5(6) . . ? 
O3A C3A C4A 135.0(7) . . ? 
O3A C3A C2A 134.5(7) . . ? 
C4A C3A C2A 90.5(6) . . ? 
C3A O3A Tb1 133.9(5) . . ? 
C3A C4A C5A 133.2(7) . . ? 
C3A C4A C1A 92.1(6) . . ? 
C5A C4A C1A 134.7(7) . . ? 
C10A C5A C6A 118.6(7) . . ? 
C10A C5A C4A 120.8(7) . . ? 
C6A C5A C4A 120.6(7) . . ? 
C7A C6A C5A 118.9(7) . . ? 
C6A C7A C8A 121.5(7) . . ? 
O11A C8A C9A 125.6(7) . . ? 
O11A C8A C7A 114.7(7) . . ? 
C9A C8A C7A 119.8(7) . . ? 
C8A C9A C10A 119.4(7) . . ? 
C9A C10A C5A 121.8(7) . . ? 
C8A O11A C12A 116.3(6) . . ? 
O1B C1B C4B 135.5(7) . . ? 
O1B C1B C2B 135.4(7) . . ? 
C4B C1B C2B 89.1(6) . . ? 
C1B O1B Tb2 138.4(5) . . ? 
O2B C2B C3B 136.1(7) . . ? 
O2B C2B C1B 136.3(7) . . ? 
C3B C2B C1B 87.6(6) . . ? 
O3B C3B C4B 134.4(7) . . ? 
O3B C3B C2B 135.0(7) . . ? 
C4B C3B C2B 90.5(6) . . ? 
C3B O3B Tb1 143.4(5) . . ? 
C5B C4B C3B 133.6(7) . . ? 
C5B C4B C1B 133.7(7) . . ? 
C3B C4B C1B 92.7(6) . . ? 
C6B C5B C10B 118.7(7) . . ? 
C6B C5B C4B 119.5(7) . . ? 
C10B C5B C4B 121.7(7) . . ? 
C7B C6B C5B 121.0(8) . . ? 
C6B C7B C8B 119.5(8) . . ? 
O11B C8B C7B 115.8(8) . . ? 
O11B C8B C9B 123.3(8) . . ? 
C7B C8B C9B 120.9(8) . . ? 
C10B C9B C8B 118.5(8) . . ? 
C9B C10B C5B 121.4(7) . . ? 
C8B O11B C12B 117.7(7) . . ? 
O1C C1C C4C 136.0(7) . . ? 
O1C C1C C2C 134.5(7) . . ? 
C4C C1C C2C 89.4(6) . . ? 
C1C O1C Tb1 142.6(5) . . ? 
O2C C2C C1C 135.2(7) . . ? 
O2C C2C C3C 136.5(7) . . ? 
C1C C2C C3C 88.3(6) . . ? 
O3C C3C C4C 135.7(7) . . ? 
O3C C3C C2C 134.7(7) . . ? 
C4C C3C C2C 89.6(6) . . ? 
C5C C4C C3C 134.2(7) . . ? 
C5C C4C C1C 133.2(7) . . ? 
C3C C4C C1C 92.6(6) . . ? 
C10C C5C C6C 117.5(7) . . ? 
C10C C5C C4C 122.3(7) . . ? 
C6C C5C C4C 120.2(6) . . ? 
C7C C6C C5C 121.1(7) . . ? 
C6C C7C C8C 120.2(7) . . ? 
O11C C8C C7C 116.2(7) . . ? 
O11C C8C C9C 123.7(7) . . ? 
C7C C8C C9C 120.1(7) . . ? 
C10C C9C C8C 118.7(7) . . ? 
C9C C10C C5C 122.2(7) . . ? 
C8C O11C C12C 118.3(6) . . ? 
O1D C1D C4D 137.2(7) . . ? 
O1D C1D C2D 132.5(8) . . ? 
C4D C1D C2D 90.2(6) . . ? 
O2D C2D C1D 135.9(8) . . ? 
O2D C2D C3D 136.6(7) . . ? 
C1D C2D C3D 87.3(6) . . ? 
O3D C3D C4D 135.2(7) . . ? 
O3D C3D C2D 134.7(7) . . ? 
C4D C3D C2D 90.1(6) . . ? 
C3D O3D Tb1 125.0(5) . . ? 
C5D C4D C3D 130.2(7) . . ? 
C5D C4D C1D 137.6(7) . . ? 
C3D C4D C1D 92.1(6) . . ? 
C6D C5D C10D 118.4(7) . . ? 
C6D C5D C4D 120.0(7) . . ? 
C10D C5D C4D 121.6(7) . . ? 
C7D C6D C5D 120.9(7) . . ? 
C6D C7D C8D 120.7(8) . . ? 
O11D C8D C9D 124.4(8) . . ? 
O11D C8D C7D 115.9(8) . . ? 
C9D C8D C7D 119.7(8) . . ? 
C8D C9D C10D 121.4(8) . . ? 
C9D C10D C5D 118.9(8) . . ? 
C8D O11D C12D 117.5(7) . . ? 
O1E C1E C4E 137.6(7) . . ? 
O1E C1E C2E 133.4(7) . . ? 
C4E C1E C2E 89.0(6) . . ? 
O2E C2E C3E 135.8(7) . . ? 
O2E C2E C1E 136.8(7) . . ? 
C3E C2E C1E 87.3(6) . . ? 
O3E C3E C4E 134.2(7) . . ? 
O3E C3E C2E 134.2(7) . . ? 
C4E C3E C2E 91.7(6) . . ? 
C3E O3E Tb2 143.8(5) . . ? 
C3E C4E C1E 92.1(6) . . ? 
C3E C4E C5E 133.6(7) . . ? 
C1E C4E C5E 134.2(7) . . ? 
C10E C5E C6E 118.4(7) . . ? 
C10E C5E C4E 121.8(7) . . ? 
C6E C5E C4E 119.8(7) . . ? 
C7E C6E C5E 120.4(7) . . ? 
C6E C7E C8E 119.8(7) . . ? 
O11E C8E C7E 115.7(7) . . ? 
O11E C8E C9E 123.8(7) . . ? 
C7E C8E C9E 120.5(7) . . ? 
C10E C9E C8E 119.3(7) . . ? 
C9E C10E C5E 121.5(7) . . ? 
C8E O11E C12E 118.5(6) . . ? 
O1F C1F C4F 135.8(7) . . ? 
O1F C1F C2F 133.5(7) . . ? 
C4F C1F C2F 90.7(6) . . ? 
O2F C2F C3F 136.7(7) . . ? 
O2F C2F C1F 135.3(7) . . ? 
C3F C2F C1F 88.0(6) . . ? 
O3F C3F C4F 135.7(7) . . ? 
O3F C3F C2F 133.8(7) . . ? 
C4F C3F C2F 90.3(6) . . ? 
C3F O3F Tb2 128.3(5) . . ? 
C5F C4F C1F 133.2(7) . . ? 
C5F C4F C3F 135.8(7) . . ? 
C1F C4F C3F 90.9(6) . . ? 
C6F C5F C10F 117.9(7) . . ? 
C6F C5F C4F 123.6(7) . . ? 
C10F C5F C4F 118.5(7) . . ? 
C7F C6F C5F 121.7(8) . . ? 
C6F C7F C8F 119.5(8) . . ? 
C9F C8F O11F 125.3(8) . . ? 
C9F C8F C7F 120.4(7) . . ? 
O11F C8F C7F 114.3(7) . . ? 
C8F C9F C10F 118.7(8) . . ? 
C9F C10F C5F 121.7(7) . . ? 
C8F O11F C12F 116.8(7) . . ? 
O3H Tb3 O3J 92.6(2) . . ? 
O3H Tb3 O32 100.1(2) . . ? 
O3J Tb3 O32 143.3(2) . . ? 
O3H Tb3 O3G 70.4(2) . . ? 
O3J Tb3 O3G 76.7(2) . . ? 
O32 Tb3 O3G 75.5(2) . . ? 
O3H Tb3 O31 144.5(2) . . ? 
O3J Tb3 O31 74.9(2) . . ? 
O32 Tb3 O31 74.9(2) . . ? 
O3G Tb3 O31 74.4(2) . . ? 
O3H Tb3 O33 73.7(2) . . ? 
O3J Tb3 O33 147.2(2) . . ? 
O32 Tb3 O33 69.4(2) . . ? 
O3G Tb3 O33 123.3(2) . . ? 
O31 Tb3 O33 132.3(2) . . ? 
O3H Tb3 O1I 83.1(2) . . ? 
O3J Tb3 O1I 69.7(2) . . ? 
O32 Tb3 O1I 145.6(2) . . ? 
O3G Tb3 O1I 135.8(2) . . ? 
O31 Tb3 O1I 121.1(2) . . ? 
O33 Tb3 O1I 79.0(2) . . ? 
O3H Tb3 O34 141.7(2) . . ? 
O3J Tb3 O34 107.7(2) . . ? 
O32 Tb3 O34 82.9(2) . . ? 
O3G Tb3 O34 144.9(2) . . ? 
O31 Tb3 O34 73.5(2) . . ? 
O33 Tb3 O34 71.8(2) . . ? 
O1I Tb3 O34 74.5(2) . . ? 
O1L Tb4 O3K 145.9(2) . . ? 
O1L Tb4 O44 94.5(2) . . ? 
O3K Tb4 O44 85.8(2) . . ? 
O1L Tb4 O45 97.0(2) . . ? 
O3K Tb4 O45 102.4(2) . . ? 
O44 Tb4 O45 144.4(2) . . ? 
O1L Tb4 O43 81.7(2) . . ? 
O3K Tb4 O43 79.4(2) . . ? 
O44 Tb4 O43 146.2(2) . . ? 
O45 Tb4 O43 69.1(2) . . ? 
O1L Tb4 O1H 73.2(2) . . ? 
O3K Tb4 O1H 74.8(2) . . ? 
O44 Tb4 O1H 70.6(2) . . ? 
O45 Tb4 O1H 145.0(2) . . ? 
O43 Tb4 O1H 76.2(2) . . ? 
O1L Tb4 O41 71.5(2) . . ? 
O3K Tb4 O41 140.6(2) . . ? 
O44 Tb4 O41 76.7(2) . . ? 
O45 Tb4 O41 75.3(2) . . ? 
O43 Tb4 O41 131.9(2) . . ? 
O1H Tb4 O41 128.9(2) . . ? 
O1L Tb4 O42 139.7(2) . . ? 
O3K Tb4 O42 73.2(2) . . ? 
O44 Tb4 O42 74.6(2) . . ? 
O45 Tb4 O42 74.8(2) . . ? 
O43 Tb4 O42 128.1(2) . . ? 
O1H Tb4 O42 133.8(2) . . ? 
O41 Tb4 O42 68.3(2) . . ? 
O1G C1G C4G 136.6(7) . . ? 
O1G C1G C2G 133.3(7) . . ? 
C4G C1G C2G 90.0(6) . . ? 
O2G C2G C3G 135.6(7) . . ? 
O2G C2G C1G 136.4(7) . . ? 
C3G C2G C1G 88.0(6) . . ? 
O3G C3G C4G 135.9(7) . . ? 
O3G C3G C2G 134.3(7) . . ? 
C4G C3G C2G 89.8(6) . . ? 
C3G O3G Tb3 132.8(5) . . ? 
C1G C4G C3G 92.1(6) . . ? 
C1G C4G C5G 137.0(7) . . ? 
C3G C4G C5G 130.8(7) . . ? 
C10G C5G C6G 118.7(7) . . ? 
C10G C5G C4G 119.2(7) . . ? 
C6G C5G C4G 122.2(7) . . ? 
C7G C6G C5G 120.8(7) . . ? 
C6G C7G C8G 119.9(7) . . ? 
O11G C8G C9G 124.6(7) . . ? 
O11G C8G C7G 114.9(7) . . ? 
C9G C8G C7G 120.5(7) . . ? 
C8G C9G C10G 119.1(7) . . ? 
C5G C10G C9G 121.0(7) . . ? 
C8G O11G C12G 117.4(6) . . ? 
O1H C1H C4H 135.6(7) . . ? 
O1H C1H C2H 134.9(7) . . ? 
C4H C1H C2H 89.5(6) . . ? 
C1H O1H Tb4 136.3(5) . . ? 
O2H C2H C3H 137.6(7) . . ? 
O2H C2H C1H 136.6(7) . . ? 
C3H C2H C1H 85.8(6) . . ? 
O3H C3H C4H 134.8(7) . . ? 
O3H C3H C2H 133.0(7) . . ? 
C4H C3H C2H 92.1(6) . . ? 
C3H O3H Tb3 145.3(5) . . ? 
C3H C4H C1H 92.4(6) . . ? 
C3H C4H C5H 133.0(7) . . ? 
C1H C4H C5H 134.6(7) . . ? 
C10H C5H C6H 118.0(7) . . ? 
C10H C5H C4H 121.7(7) . . ? 
C6H C5H C4H 120.2(7) . . ? 
C7H C6H C5H 120.6(8) . . ? 
C6H C7H C8H 119.5(8) . . ? 
C9H C8H O11H 124.6(8) . . ? 
C9H C8H C7H 121.1(8) . . ? 
O11H C8H C7H 114.4(7) . . ? 
C10H C9H C8H 119.4(8) . . ? 
C9H C10H C5H 121.3(7) . . ? 
C8H O11H C12H 117.8(6) . . ? 
O1I C1I C4I 135.1(7) . . ? 
O1I C1I C2I 134.8(7) . . ? 
C4I C1I C2I 90.1(6) . . ? 
C1I O1I Tb3 141.4(5) . . ? 
O2I C2I C1I 134.9(7) . . ? 
O2I C2I C3I 136.7(7) . . ? 
C1I C2I C3I 88.3(6) . . ? 
O3I C3I C4I 137.2(7) . . ? 
O3I C3I C2I 134.0(7) . . ? 
C4I C3I C2I 88.8(6) . . ? 
C1I C4I C5I 136.7(7) . . ? 
C1I C4I C3I 92.7(6) . . ? 
C5I C4I C3I 130.6(7) . . ? 
C10I C5I C6I 119.2(7) . . ? 
C10I C5I C4I 121.3(7) . . ? 
C6I C5I C4I 119.4(7) . . ? 
C7I C6I C5I 120.1(7) . . ? 
C6I C7I C8I 119.9(7) . . ? 
O11I C8I C9I 126.0(7) . . ? 
O11I C8I C7I 113.6(7) . . ? 
C9I C8I C7I 120.3(7) . . ? 
C8I C9I C10I 120.5(7) . . ? 
C9I C10I C5I 119.9(7) . . ? 
C8I O11I C12I 117.5(7) . . ? 
O1J C1J C4J 137.0(8) . . ? 
O1J C1J C2J 133.7(8) . . ? 
C4J C1J C2J 89.3(6) . . ? 
O2J C2J C1J 137.1(8) . . ? 
O2J C2J C3J 135.5(7) . . ? 
C1J C2J C3J 87.1(6) . . ? 
O3J C3J C4J 135.2(7) . . ? 
O3J C3J C2J 134.3(7) . . ? 
C4J C3J C2J 90.5(6) . . ? 
C3J O3J Tb3 125.6(5) . . ? 
C3J C4J C5J 130.0(7) . . ? 
C3J C4J C1J 92.5(6) . . ? 
C5J C4J C1J 137.5(7) . . ? 
C10J C5J C6J 118.9(7) . . ? 
C10J C5J C4J 121.8(7) . . ? 
C6J C5J C4J 119.2(7) . . ? 
C7J C6J C5J 120.7(7) . . ? 
C6J C7J C8J 120.2(8) . . ? 
O11J C8J C9J 124.9(7) . . ? 
O11J C8J C7J 115.0(8) . . ? 
C9J C8J C7J 120.1(8) . . ? 
C8J C9J C10J 119.1(7) . . ? 
C5J C10J C9J 120.8(8) . . ? 
C8J O11J C12J 116.9(7) . . ? 
O1K C1K C4K 136.1(7) . . ? 
O1K C1K C2K 133.4(7) . . ? 
C4K C1K C2K 90.5(6) . . ? 
O2K C2K C1K 136.6(7) . . ? 
O2K C2K C3K 136.5(7) . . ? 
C1K C2K C3K 86.8(6) . . ? 
O3K C3K C4K 136.1(7) . . ? 
O3K C3K C2K 133.1(7) . . ? 
C4K C3K C2K 90.8(6) . . ? 
C3K O3K Tb4 135.3(5) . . ? 
C3K C4K C1K 91.8(6) . . ? 
C3K C4K C5K 133.4(7) . . ? 
C1K C4K C5K 134.7(7) . . ? 
C10K C5K C6K 118.0(7) . . ? 
C10K C5K C4K 120.8(7) . . ? 
C6K C5K C4K 121.3(7) . . ? 
C7K C6K C5K 121.2(7) . . ? 
C6K C7K C8K 121.1(7) . . ? 
O11K C8K C7K 116.4(7) . . ? 
O11K C8K C9K 124.9(7) . . ? 
C7K C8K C9K 118.8(7) . . ? 
C10K C9K C8K 120.4(7) . . ? 
C9K C10K C5K 120.5(7) . . ? 
C8K O11K C12K 118.2(6) . . ? 
O1L C1L C4L 134.3(7) . . ? 
O1L C1L C2L 134.0(7) . . ? 
C4L C1L C2L 91.6(6) . . ? 
O1L C1L C3L 179.0(6) . . ? 
C4L C1L C3L 44.7(4) . . ? 
C2L C1L C3L 46.9(4) . . ? 
C1L O1L Tb4 156.4(5) . . ? 
O2L C2L C1L 137.8(7) . . ? 
O2L C2L C3L 134.4(7) . . ? 
C1L C2L C3L 87.8(6) . . ? 
O3L C3L C4L 138.7(7) . . ? 
O3L C3L C2L 131.7(7) . . ? 
C4L C3L C2L 89.6(6) . . ? 
O3L C3L C1L 177.0(7) . . ? 
C4L C3L C1L 44.3(4) . . ? 
C2L C3L C1L 45.3(4) . . ? 
C1L C4L C3L 91.0(6) . . ? 
C1L C4L C5L 131.4(7) . . ? 
C3L C4L C5L 137.6(7) . . ? 
C10L C5L C6L 117.9(7) . . ? 
C10L C5L C4L 119.2(7) . . ? 
C6L C5L C4L 122.9(7) . . ? 
C7L C6L C5L 121.5(7) . . ? 
C6L C7L C8L 120.0(8) . . ? 
O11L C8L C7L 116.6(8) . . ? 
O11L C8L C9L 123.6(7) . . ? 
C7L C8L C9L 119.8(8) . . ? 
C10L C9L C8L 119.3(7) . . ? 
C9L C10L C5L 121.5(7) . . ? 
C8L O11L C12L 118.2(7) . . ? 
  
_refine_diff_density_max    1.010 
_refine_diff_density_min   -1.471 
_refine_diff_density_rms    0.153 
  
#===END

 
data_Compound 5
 
_audit_creation_method            SHELXL 
_chemical_name_systematic 
; 
 ? 
; 
_chemical_name_common             ? 
_chemical_formula_moiety          ? 
_chemical_formula_structural      ? 
_chemical_formula_analytical      ? 
_chemical_formula_sum             'C14 H26 Eu N O17' 
_chemical_formula_weight          632.32 
_chemical_melting_point           ? 
_chemical_compound_source         ? 
 
loop_ 
 _atom_type_symbol 
 _atom_type_description 
 _atom_type_scat_dispersion_real 
 _atom_type_scat_dispersion_imag 
 _atom_type_scat_source 
 'C'  'C'   0.0033   0.0016 
 'International Tables Vol C Tables 4.2.6.8 and 6.1.1.4' 
 'H'  'H'   0.0000   0.0000 
 'International Tables Vol C Tables 4.2.6.8 and 6.1.1.4' 
 'N'  'N'   0.0061   0.0033 
 'International Tables Vol C Tables 4.2.6.8 and 6.1.1.4' 
 'O'  'O'   0.0106   0.0060 
 'International Tables Vol C Tables 4.2.6.8 and 6.1.1.4' 
 'Eu'  'Eu'  -0.1578   3.6682 
 'International Tables Vol C Tables 4.2.6.8 and 6.1.1.4' 
 
_symmetry_cell_setting            ? 
_symmetry_space_group_name_H-M    ? 
 
loop_ 
 _symmetry_equiv_pos_as_xyz 
 'x, y, z' 
 '-x+1/2, y, -z' 
 'x+1/2, y+1/2, z+1/2' 
 '-x+1, y+1/2, -z+1/2' 
 '-x, -y, -z' 
 'x-1/2, -y, z' 
 '-x+1/2, -y+1/2, -z+1/2' 
 'x, -y+1/2, z+1/2' 
 
_cell_length_a                    16.5920(8) 
_cell_length_b                    7.6238(2) 
_cell_length_c                    35.4976(13) 
_cell_angle_alpha                 90.00 
_cell_angle_beta                  96.540(2) 
_cell_angle_gamma                 90.00 
_cell_volume                      4461.0(3) 
_cell_formula_units_Z             8 
_cell_measurement_temperature     150(2) 
_cell_measurement_reflns_used     ? 
_cell_measurement_theta_min       ? 
_cell_measurement_theta_max       ? 
 
_exptl_crystal_description        ? 
_exptl_crystal_colour             ? 
_exptl_crystal_size_max           ? 
_exptl_crystal_size_mid           ? 
_exptl_crystal_size_min           ? 
_exptl_crystal_density_meas       ? 
_exptl_crystal_density_diffrn     1.883 
_exptl_crystal_density_method     ? 
_exptl_crystal_F_000              2528 
_exptl_absorpt_coefficient_mu     2.896 
_exptl_absorpt_correction_type    ? 
_exptl_absorpt_correction_T_min   ? 
_exptl_absorpt_correction_T_max   ? 
 
_exptl_special_details 
; 
 ? 
; 
 
_diffrn_ambient_temperature       150(2) 
_diffrn_radiation_wavelength      0.71073 
_diffrn_radiation_type            MoK\a 
_diffrn_radiation_source          'fine-focus sealed tube' 
_diffrn_radiation_monochromator   graphite 
_diffrn_measurement_device        ? 
_diffrn_measurement_method        ? 
_diffrn_standards_number          ? 
_diffrn_standards_interval_count  ? 
_diffrn_standards_interval_time   ? 
_diffrn_standards_decay_%         ? 
_diffrn_reflns_number             15855 
_diffrn_reflns_av_R_equivalents   0.0764 
_diffrn_reflns_av_sigmaI/netI     0.0900 
_diffrn_reflns_limit_h_min        -21 
_diffrn_reflns_limit_h_max        21 
_diffrn_reflns_limit_k_min        -9 
_diffrn_reflns_limit_k_max        9 
_diffrn_reflns_limit_l_min        -45 
_diffrn_reflns_limit_l_max        46 
_diffrn_reflns_theta_min          3.11 
_diffrn_reflns_theta_max          27.55 
_reflns_number_total              5120 
_reflns_number_observed           3991 
_reflns_observed_criterion        >2sigma(I) 
 
_computing_data_collection        ? 
_computing_cell_refinement        ? 
_computing_data_reduction         ? 
_computing_structure_solution     'SHELXS-86 (Sheldrick, 1990)' 
_computing_structure_refinement   'SHELXL-93 (Sheldrick, 1993)' 
_computing_molecular_graphics     ? 
_computing_publication_material   ? 
 
_refine_special_details 
; 
 Refinement on F^2^ for ALL reflections except for 331 with very negative F^2^ 
 or flagged by the user for potential systematic errors.  Weighted R-factors 
 wR and all goodnesses of fit S are based on F^2^, conventional R-factors R 
 are based on F, with F set to zero for negative F^2^. The observed criterion 
 of F^2^ > 2sigma(F^2^) is used only for calculating _R_factor_obs etc. and is 
 not relevant to the choice of reflections for refinement.  R-factors based 
 on F^2^ are statistically about twice as large as those based on F, and R- 
 factors based on ALL data will be even larger. 
; 
 
_refine_ls_structure_factor_coef  Fsqd  
_refine_ls_matrix_type            full 
_refine_ls_weighting_scheme 
 'calc w=1/[\s^2^(Fo^2^)+(0.0645P)^2^+0.0000P] where P=(Fo^2^+2Fc^2^)/3' 
_atom_sites_solution_primary      direct 
_atom_sites_solution_secondary    difmap 
_atom_sites_solution_hydrogens    geom 
_refine_ls_hydrogen_treatment     ? 
_refine_ls_extinction_method      none 
_refine_ls_extinction_coef        ? 
_refine_ls_number_reflns          4789 
_refine_ls_number_parameters      286 
_refine_ls_number_restraints      0 
_refine_ls_R_factor_all           0.0680 
_refine_ls_R_factor_obs           0.0492 
_refine_ls_wR_factor_all          0.1364 
_refine_ls_wR_factor_obs          0.1211 
_refine_ls_goodness_of_fit_all    1.043 
_refine_ls_goodness_of_fit_obs    1.082 
_refine_ls_restrained_S_all       1.069 
_refine_ls_restrained_S_obs       1.082 
_refine_ls_shift/esd_max          0.003 
_refine_ls_shift/esd_mean         0.000 
 
loop_ 
 _atom_site_label 
 _atom_site_type_symbol 
 _atom_site_fract_x 
 _atom_site_fract_y 
 _atom_site_fract_z 
 _atom_site_U_iso_or_equiv 
 _atom_site_thermal_displace_type 
 _atom_site_occupancy 
 _atom_site_calc_flag 
 _atom_site_refinement_flags 
 _atom_site_disorder_group 
Eu Eu 0.07926(2) 0.34131(3) 0.931872(7) 0.01858(12) Uani 1 d . . 
O1 O 0.1207(3) 0.6273(5) 0.94416(12) 0.0270(9) Uani 1 d . . 
C1 C 0.1746(4) 0.7453(7) 0.9488(2) 0.0218(12) Uani 1 d . . 
O2 O 0.1115(2) 1.0420(5) 0.94348(11) 0.0207(8) Uani 1 d . . 
C2 C 0.1701(4) 0.9353(7) 0.94739(14) 0.0197(11) Uani 1 d . . 
O3 O 0.3093(3) 1.0677(5) 0.95559(11) 0.0255(9) Uani 1 d . . 
C3 C 0.2580(3) 0.9443(6) 0.95365(15) 0.0182(11) Uani 1 d . . 
O4 O 0.3201(3) 0.6470(5) 0.96502(12) 0.0243(9) Uani 1 d . . 
C4 C 0.2639(4) 0.7526(7) 0.95698(14) 0.0192(11) Uani 1 d . . 
O5 O -0.0394(3) 0.5231(5) 0.91608(11) 0.0266(9) Uani 1 d . . 
O6 O -0.0177(3) 0.2625(6) 0.97450(12) 0.0296(9) Uani 1 d . . 
O7 O 0.1543(3) 0.3425(5) 0.99450(11) 0.0252(9) Uani 1 d . . 
O8 O 0.2143(3) 0.3158(5) 0.91501(12) 0.0274(9) Uani 1 d . . 
O9 O 0.0826(3) 0.4625(6) 0.86745(11) 0.0309(9) Uani 1 d . . 
O10 O -0.0066(3) 0.1588(5) 0.88833(13) 0.0322(10) Uani 1 d . . 
O11 O 0.0619(3) -0.1481(5) 0.67731(13) 0.0322(10) Uani 1 d . . 
C11 C 0.1340(4) -0.0933(8) 0.6816(2) 0.0256(12) Uani 1 d . . 
O12 O 0.1926(3) -0.0383(6) 0.61995(11) 0.0303(9) Uani 1 d . . 
C12 C 0.1927(4) -0.0448(8) 0.6550(2) 0.0250(12) Uani 1 d . . 
O13 O 0.3247(3) 0.0465(6) 0.69104(12) 0.0315(10) Uani 1 d . . 
C13 C 0.2522(4) -0.0049(8) 0.6879(2) 0.0270(12) Uani 1 d . . 
C14 C 0.1926(4) -0.0528(7) 0.7130(2) 0.0265(12) Uani 1 d . . 
N15 N 0.1831(3) -0.0611(7) 0.74981(14) 0.0314(12) Uani 1 d . . 
C16 C 0.2147(2) -0.0346(6) 0.81724(11) 0.043(2) Uani 1 d G . 
H16A H 0.1633(2) -0.0856(6) 0.81978(11) 0.052 Uiso 1 calc R . 
C17 C 0.2656(3) 0.0143(7) 0.84935(9) 0.046(2) Uani 1 d G . 
H17A H 0.2491(4) -0.0034(10) 0.87383(10) 0.055 Uiso 1 calc R . 
C18 C 0.3407(3) 0.0890(7) 0.84565(10) 0.042(2) Uani 1 d G . 
H18A H 0.3755(4) 0.1224(9) 0.86759(13) 0.050 Uiso 1 calc R . 
C19 C 0.3649(2) 0.1148(7) 0.80984(13) 0.050(2) Uani 1 d G . 
H19A H 0.4162(3) 0.1659(10) 0.8073(2) 0.060 Uiso 1 calc R . 
C20 C 0.3140(3) 0.0660(7) 0.77773(9) 0.048(2) Uani 1 d G . 
H20A H 0.3305(4) 0.0837(10) 0.75326(11) 0.058 Uiso 1 calc R . 
C21 C 0.2389(2) -0.0087(6) 0.78143(9) 0.0317(14) Uani 1 d G . 
O30 O 0.4681(3) 0.1541(5) 0.95197(12) 0.0277(9) Uani 1 d . . 
O40 O 0.5496(4) 0.1535(6) 0.86420(14) 0.0431(12) Uani 1 d . . 
O50 O 0.4525(4) 0.3049(7) 0.7212(2) 0.0507(13) Uani 1 d . . 
O60 O 0.4439(4) 0.7786(8) 0.7136(2) 0.0536(14) Uani 1 d . . 
 
loop_ 
 _atom_site_aniso_label 
 _atom_site_aniso_U_11 
 _atom_site_aniso_U_22 
 _atom_site_aniso_U_33 
 _atom_site_aniso_U_23 
 _atom_site_aniso_U_13 
 _atom_site_aniso_U_12 
Eu 0.0139(2) 0.0196(2) 0.0223(2) 0.00049(10) 0.00219(11) -0.00003(10) 
O1 0.018(2) 0.020(2) 0.043(3) 0.001(2) 0.001(2) -0.003(2) 
C1 0.017(3) 0.022(3) 0.027(3) -0.003(2) 0.005(2) -0.001(2) 
O2 0.016(2) 0.017(2) 0.029(2) 0.0013(15) 0.004(2) 0.0007(15) 
C2 0.022(3) 0.020(3) 0.018(3) 0.000(2) 0.005(2) -0.002(2) 
O3 0.022(2) 0.025(2) 0.029(2) 0.001(2) 0.004(2) -0.004(2) 
C3 0.018(3) 0.016(3) 0.020(3) -0.001(2) 0.003(2) -0.002(2) 
O4 0.017(2) 0.024(2) 0.032(2) 0.004(2) 0.004(2) 0.004(2) 
C4 0.017(3) 0.025(3) 0.016(2) 0.000(2) 0.002(2) 0.001(2) 
O5 0.022(2) 0.026(2) 0.032(2) 0.001(2) 0.004(2) 0.004(2) 
O6 0.020(2) 0.039(2) 0.031(2) 0.006(2) 0.009(2) -0.001(2) 
O7 0.023(2) 0.026(2) 0.025(2) 0.0006(15) -0.004(2) -0.001(2) 
O8 0.018(2) 0.033(2) 0.033(2) 0.004(2) 0.007(2) -0.001(2) 
O9 0.024(2) 0.046(2) 0.023(2) 0.007(2) 0.004(2) 0.003(2) 
O10 0.031(3) 0.026(2) 0.036(2) 0.000(2) -0.008(2) -0.002(2) 
O11 0.019(2) 0.048(3) 0.029(2) 0.001(2) 0.003(2) -0.009(2) 
C11 0.023(3) 0.027(3) 0.027(3) 0.002(2) 0.003(2) -0.003(2) 
O12 0.020(2) 0.048(2) 0.023(2) 0.000(2) 0.002(2) -0.004(2) 
C12 0.018(3) 0.030(3) 0.026(3) 0.001(2) 0.001(2) 0.000(2) 
O13 0.018(2) 0.047(3) 0.030(2) -0.003(2) 0.004(2) -0.009(2) 
C13 0.020(3) 0.036(3) 0.025(3) -0.002(2) 0.002(2) 0.000(2) 
C14 0.026(3) 0.031(3) 0.023(3) -0.001(2) 0.001(2) -0.003(2) 
N15 0.029(3) 0.043(3) 0.022(2) 0.000(2) 0.001(2) -0.001(2) 
C16 0.051(5) 0.055(4) 0.024(3) -0.002(3) 0.003(3) -0.012(4) 
C17 0.056(5) 0.054(4) 0.026(3) 0.001(3) 0.002(3) 0.000(4) 
C18 0.042(5) 0.043(4) 0.037(4) -0.007(3) -0.010(3) 0.009(3) 
C19 0.030(4) 0.078(5) 0.041(4) -0.018(4) -0.004(3) -0.012(4) 
C20 0.032(4) 0.082(6) 0.030(4) -0.003(3) -0.001(3) -0.012(4) 
C21 0.034(4) 0.032(3) 0.028(3) -0.003(2) 0.001(3) 0.007(3) 
O30 0.021(2) 0.030(2) 0.033(2) 0.001(2) 0.005(2) 0.000(2) 
O40 0.049(4) 0.042(3) 0.038(3) 0.001(2) 0.004(2) -0.004(2) 
O50 0.035(3) 0.068(3) 0.050(3) -0.010(3) 0.008(3) 0.005(3) 
O60 0.043(4) 0.061(3) 0.056(3) -0.001(3) 0.005(3) 0.000(3) 
 
_geom_special_details 
; 
 All esds (except the esd in the dihedral angle between two l.s. planes) 
 are estimated using the full covariance matrix.  The cell esds are taken 
 into account individually in the estimation of esds in distances, angles 
 and torsion angles; correlations between esds in cell parameters are only 
 used when they are defined by crystal symmetry.  An approximate (isotropic) 
 treatment of cell esds is used for estimating esds involving l.s. planes. 
; 
 
loop_ 
 _geom_bond_atom_site_label_1 
 _geom_bond_atom_site_label_2 
 _geom_bond_distance 
 _geom_bond_site_symmetry_2 
 _geom_bond_publ_flag 
Eu O1 2.313(4) . ? 
Eu O2 2.369(4) 1_545 ? 
Eu O8 2.391(4) . ? 
Eu O6 2.407(4) . ? 
Eu O10 2.420(4) . ? 
Eu O5 2.420(4) . ? 
Eu O7 2.421(4) . ? 
Eu O9 2.473(4) . ? 
O1 C1 1.266(7) . ? 
C1 C2 1.451(8) . ? 
C1 C4 1.478(8) . ? 
O2 C2 1.263(7) . ? 
O2 Eu 2.369(4) 1_565 ? 
C2 C3 1.451(8) . ? 
O3 C3 1.265(6) . ? 
C3 C4 1.469(8) . ? 
O4 C4 1.239(7) . ? 
O11 C11 1.260(8) . ? 
C11 C14 1.428(9) . ? 
C11 C12 1.477(8) . ? 
O12 C12 1.246(7) . ? 
C12 C13 1.473(8) . ? 
O13 C13 1.258(7) . ? 
C13 C14 1.451(8) . ? 
C14 N15 1.334(7) . ? 
N15 C21 1.428(6) . ? 
C16 C17 1.39 . ? 
C16 C21 1.39 . ? 
C17 C18 1.39 . ? 
C18 C19 1.39 . ? 
C19 C20 1.39 . ? 
C20 C21 1.39 . ? 
 
loop_ 
 _geom_angle_atom_site_label_1 
 _geom_angle_atom_site_label_2 
 _geom_angle_atom_site_label_3 
 _geom_angle 
 _geom_angle_site_symmetry_1 
 _geom_angle_site_symmetry_3 
 _geom_angle_publ_flag 
O1 Eu O2 145.0(2) . 1_545 ? 
O1 Eu O8 81.77(14) . . ? 
O2 Eu O8 76.47(13) 1_545 . ? 
O1 Eu O6 108.81(15) . . ? 
O2 Eu O6 78.71(13) 1_545 . ? 
O8 Eu O6 148.14(15) . . ? 
O1 Eu O10 143.47(15) . . ? 
O2 Eu O10 70.24(14) 1_545 . ? 
O8 Eu O10 107.1(2) . . ? 
O6 Eu O10 82.6(2) . . ? 
O1 Eu O5 73.76(14) . . ? 
O2 Eu O5 138.88(14) 1_545 . ? 
O8 Eu O5 138.48(13) . . ? 
O6 Eu O5 72.79(14) . . ? 
O10 Eu O5 77.12(14) . . ? 
O1 Eu O7 73.29(14) . . ? 
O2 Eu O7 76.21(13) 1_545 . ? 
O8 Eu O7 80.30(15) . . ? 
O6 Eu O7 74.61(15) . . ? 
O10 Eu O7 142.43(13) . . ? 
O5 Eu O7 122.02(13) . . ? 
O1 Eu O9 77.56(15) . . ? 
O2 Eu O9 119.49(13) 1_545 . ? 
O8 Eu O9 71.24(14) . . ? 
O6 Eu O9 139.61(15) . . ? 
O10 Eu O9 72.41(15) . . ? 
O5 Eu O9 71.05(13) . . ? 
O7 Eu O9 141.64(15) . . ? 
C1 O1 Eu 152.2(4) . . ? 
O1 C1 C2 132.2(6) . . ? 
O1 C1 C4 136.9(5) . . ? 
C2 C1 C4 90.9(4) . . ? 
C2 O2 Eu 142.7(4) . 1_565 ? 
O2 C2 C1 133.0(5) . . ? 
O2 C2 C3 137.2(5) . . ? 
C1 C2 C3 89.7(4) . . ? 
O3 C3 C2 134.6(5) . . ? 
O3 C3 C4 134.2(5) . . ? 
C2 C3 C4 91.3(4) . . ? 
O4 C4 C3 135.0(5) . . ? 
O4 C4 C1 137.0(5) . . ? 
C3 C4 C1 88.0(4) . . ? 
O11 C11 C14 135.9(5) . . ? 
O11 C11 C12 133.8(6) . . ? 
C14 C11 C12 90.3(5) . . ? 
O12 C12 C13 135.2(5) . . ? 
O12 C12 C11 136.2(6) . . ? 
C13 C12 C11 88.6(4) . . ? 
O13 C13 C14 137.4(6) . . ? 
O13 C13 C12 132.9(5) . . ? 
C14 C13 C12 89.6(5) . . ? 
N15 C14 C11 127.6(6) . . ? 
N15 C14 C13 141.0(6) . . ? 
C11 C14 C13 91.4(5) . . ? 
C14 N15 C21 128.2(5) . . ? 
C17 C16 C21 120.0 . . ? 
C16 C17 C18 120.0 . . ? 
C17 C18 C19 120.0 . . ? 
C20 C19 C18 120.0 . . ? 
C19 C20 C21 120.0 . . ? 
C20 C21 C16 120.0 . . ? 
C20 C21 N15 123.2(3) . . ? 
C16 C21 N15 116.8(3) . . ? 
 
_refine_diff_density_max    1.263 
_refine_diff_density_min   -3.710 
_refine_diff_density_rms    0.196 

#===END

 
data_Compound 6
 
_audit_creation_method            SHELXL 
_chemical_name_systematic 
; 
 ? 
; 
_chemical_name_common             ? 
_chemical_formula_moiety          ? 
_chemical_formula_structural      ? 
_chemical_formula_analytical      ? 
_chemical_formula_sum             'C14 H26 Gd N O17' 
_chemical_formula_weight          637.61 
_chemical_melting_point           ? 
_chemical_compound_source         ? 
 
loop_ 
 _atom_type_symbol 
 _atom_type_description 
 _atom_type_scat_dispersion_real 
 _atom_type_scat_dispersion_imag 
 _atom_type_scat_source 
 'C'  'C'   0.0033   0.0016 
 'International Tables Vol C Tables 4.2.6.8 and 6.1.1.4' 
 'H'  'H'   0.0000   0.0000 
 'International Tables Vol C Tables 4.2.6.8 and 6.1.1.4' 
 'N'  'N'   0.0061   0.0033 
 'International Tables Vol C Tables 4.2.6.8 and 6.1.1.4' 
 'O'  'O'   0.0106   0.0060 
 'International Tables Vol C Tables 4.2.6.8 and 6.1.1.4' 
 'Gd'  'Gd'  -0.1653   3.9035 
 'International Tables Vol C Tables 4.2.6.8 and 6.1.1.4' 
 
_symmetry_cell_setting            ? 
_symmetry_space_group_name_H-M    ? 
 
loop_ 
 _symmetry_equiv_pos_as_xyz 
 'x, y, z' 
 '-x+1/2, y, -z' 
 'x+1/2, y+1/2, z+1/2' 
 '-x+1, y+1/2, -z+1/2' 
 '-x, -y, -z' 
 'x-1/2, -y, z' 
 '-x+1/2, -y+1/2, -z+1/2' 
 'x, -y+1/2, z+1/2' 
 
_cell_length_a                    16.5761(2) 
_cell_length_b                    7.60560(10) 
_cell_length_c                    35.4890(5) 
_cell_angle_alpha                 90.00 
_cell_angle_beta                  96.5620(10) 
_cell_angle_gamma                 90.00 
_cell_volume                      4444.83(10) 
_cell_formula_units_Z             8 
_cell_measurement_temperature     150(2) 
_cell_measurement_reflns_used     ? 
_cell_measurement_theta_min       ? 
_cell_measurement_theta_max       ? 
 
_exptl_crystal_description        ? 
_exptl_crystal_colour             ? 
_exptl_crystal_size_max           ? 
_exptl_crystal_size_mid           ? 
_exptl_crystal_size_min           ? 
_exptl_crystal_density_meas       ? 
_exptl_crystal_density_diffrn     1.906 
_exptl_crystal_density_method     ? 
_exptl_crystal_F_000              2536 
_exptl_absorpt_coefficient_mu     3.069 
_exptl_absorpt_correction_type    ? 
_exptl_absorpt_correction_T_min   ? 
_exptl_absorpt_correction_T_max   ? 
 
_exptl_special_details 
; 
 ? 
; 
 
_diffrn_ambient_temperature       150(2) 
_diffrn_radiation_wavelength      0.71073 
_diffrn_radiation_type            MoK\a 
_diffrn_radiation_source          'fine-focus sealed tube' 
_diffrn_radiation_monochromator   graphite 
_diffrn_measurement_device        ? 
_diffrn_measurement_method        ? 
_diffrn_standards_number          ? 
_diffrn_standards_interval_count  ? 
_diffrn_standards_interval_time   ? 
_diffrn_standards_decay_%         ? 
_diffrn_reflns_number             26876 
_diffrn_reflns_av_R_equivalents   0.0657 
_diffrn_reflns_av_sigmaI/netI     0.0466 
_diffrn_reflns_limit_h_min        -21 
_diffrn_reflns_limit_h_max        21 
_diffrn_reflns_limit_k_min        -9 
_diffrn_reflns_limit_k_max        9 
_diffrn_reflns_limit_l_min        -45 
_diffrn_reflns_limit_l_max        46 
_diffrn_reflns_theta_min          2.61 
_diffrn_reflns_theta_max          27.48 
_reflns_number_total              5092 
_reflns_number_observed           4334 
_reflns_observed_criterion        >2sigma(I) 
 
_computing_data_collection        ? 
_computing_cell_refinement        ? 
_computing_data_reduction         ? 
_computing_structure_solution     'SHELXS-86 (Sheldrick, 1990)' 
_computing_structure_refinement   'SHELXL-93 (Sheldrick, 1993)' 
_computing_molecular_graphics     ? 
_computing_publication_material   ? 
 
_refine_special_details 
; 
 Refinement on F^2^ for ALL reflections except for 178 with very negative F^2^ 
 or flagged by the user for potential systematic errors.  Weighted R-factors 
 wR and all goodnesses of fit S are based on F^2^, conventional R-factors R 
 are based on F, with F set to zero for negative F^2^. The observed criterion 
 of F^2^ > 2sigma(F^2^) is used only for calculating _R_factor_obs etc. and is 
 not relevant to the choice of reflections for refinement.  R-factors based 
 on F^2^ are statistically about twice as large as those based on F, and R- 
 factors based on ALL data will be even larger. 
; 
 
_refine_ls_structure_factor_coef  Fsqd  
_refine_ls_matrix_type            full 
_refine_ls_weighting_scheme 
 'calc w=1/[\s^2^(Fo^2^)+(0.0392P)^2^+16.4710P] where P=(Fo^2^+2Fc^2^)/3' 
_atom_sites_solution_primary      direct 
_atom_sites_solution_secondary    difmap 
_atom_sites_solution_hydrogens    geom 
_refine_ls_hydrogen_treatment     ? 
_refine_ls_extinction_method      SHELXL 
_refine_ls_extinction_coef        0.00036(7) 
_refine_ls_extinction_expression 
 'Fc^*^=kFc[1+0.001xFc^2^\l^3^/sin(2\q)]^-1/4^' 
_refine_ls_number_reflns          4914 
_refine_ls_number_parameters      287 
_refine_ls_number_restraints      0 
_refine_ls_R_factor_all           0.0422 
_refine_ls_R_factor_obs           0.0330 
_refine_ls_wR_factor_all          0.0885 
_refine_ls_wR_factor_obs          0.0818 
_refine_ls_goodness_of_fit_all    1.087 
_refine_ls_goodness_of_fit_obs    1.115 
_refine_ls_restrained_S_all       1.108 
_refine_ls_restrained_S_obs       1.115 
_refine_ls_shift/esd_max          -0.003 
_refine_ls_shift/esd_mean         0.000 
 
loop_ 
 _atom_site_label 
 _atom_site_type_symbol 
 _atom_site_fract_x 
 _atom_site_fract_y 
 _atom_site_fract_z 
 _atom_site_U_iso_or_equiv 
 _atom_site_thermal_displace_type 
 _atom_site_occupancy 
 _atom_site_calc_flag 
 _atom_site_refinement_flags 
 _atom_site_disorder_group 
Gd Gd 0.079343(10) 0.34106(2) 0.931805(5) 0.01091(9) Uani 1 d . . 
O1 O 0.1201(2) 0.6279(3) 0.94423(8) 0.0176(6) Uani 1 d . . 
C1 C 0.1742(2) 0.7438(5) 0.94879(10) 0.0128(7) Uani 1 d . . 
O2 O 0.1115(2) 1.0434(3) 0.94356(8) 0.0143(5) Uani 1 d . . 
C2 C 0.1703(2) 0.9345(5) 0.94764(10) 0.0112(7) Uani 1 d . . 
O3 O 0.3090(2) 1.0682(3) 0.95545(8) 0.0170(6) Uani 1 d . . 
C3 C 0.2581(2) 0.9449(5) 0.95373(10) 0.0127(7) Uani 1 d . . 
O4 O 0.3200(2) 0.6464(3) 0.96495(8) 0.0158(6) Uani 1 d . . 
C4 C 0.2635(2) 0.7522(5) 0.95698(10) 0.0123(7) Uani 1 d . . 
O5 O -0.0387(2) 0.5238(4) 0.91590(8) 0.0189(6) Uani 1 d . . 
O6 O -0.0169(2) 0.2635(4) 0.97446(8) 0.0217(6) Uani 1 d . . 
O7 O 0.1544(2) 0.3416(3) 0.99395(8) 0.0171(6) Uani 1 d . . 
O8 O 0.2141(2) 0.3163(4) 0.91523(8) 0.0194(6) Uani 1 d . . 
O9 O 0.0826(2) 0.4621(4) 0.86757(8) 0.0237(6) Uani 1 d . . 
O10 O -0.0067(2) 0.1586(4) 0.88841(9) 0.0245(7) Uani 1 d . . 
O11 O 0.0617(2) -0.1486(4) 0.67733(9) 0.0252(7) Uani 1 d . . 
C11 C 0.1333(2) -0.0928(6) 0.68118(12) 0.0204(8) Uani 1 d . . 
O12 O 0.1922(2) -0.0381(4) 0.61992(8) 0.0217(6) Uani 1 d . . 
C12 C 0.1926(2) -0.0445(5) 0.65508(11) 0.0191(8) Uani 1 d . . 
O13 O 0.3243(2) 0.0467(4) 0.69076(8) 0.0250(7) Uani 1 d . . 
C13 C 0.2523(2) -0.0053(6) 0.68787(11) 0.0189(8) Uani 1 d . . 
C14 C 0.1924(2) -0.0515(5) 0.71300(11) 0.0195(8) Uani 1 d . . 
N15 N 0.1833(2) -0.0602(5) 0.74991(10) 0.0242(8) Uani 1 d . . 
C16 C 0.2142(2) -0.0342(5) 0.81724(8) 0.0367(11) Uani 1 d G . 
H16A H 0.1627(2) -0.0849(5) 0.81973(8) 0.044 Uiso 1 calc R . 
C17 C 0.2652(2) 0.0144(5) 0.84940(6) 0.0399(12) Uani 1 d G . 
H17A H 0.2485(3) -0.0032(7) 0.87386(7) 0.048 Uiso 1 calc R . 
C18 C 0.3405(2) 0.0886(5) 0.84575(7) 0.0369(12) Uani 1 d G . 
H18A H 0.3754(2) 0.1218(7) 0.86773(9) 0.044 Uiso 1 calc R . 
C19 C 0.3649(2) 0.1143(5) 0.80996(9) 0.0454(14) Uani 1 d G . 
H19A H 0.4164(2) 0.1650(7) 0.80747(12) 0.055 Uiso 1 calc R . 
C20 C 0.3139(2) 0.0657(5) 0.77781(6) 0.0393(13) Uani 1 d G . 
H20A H 0.3306(2) 0.0833(7) 0.75335(7) 0.047 Uiso 1 calc R . 
C21 C 0.2386(2) -0.0085(4) 0.78145(6) 0.0226(9) Uani 1 d G . 
O30 O 0.4686(2) 0.1546(3) 0.95201(8) 0.0187(6) Uani 1 d . . 
O40 O 0.5498(2) 0.1533(4) 0.86451(10) 0.0354(8) Uani 1 d . . 
O50 O 0.4524(2) 0.3067(5) 0.72114(11) 0.0409(9) Uani 1 d . . 
O60 O 0.4439(2) 0.7778(5) 0.71317(11) 0.0434(9) Uani 1 d . . 
 
loop_ 
 _atom_site_aniso_label 
 _atom_site_aniso_U_11 
 _atom_site_aniso_U_22 
 _atom_site_aniso_U_33 
 _atom_site_aniso_U_23 
 _atom_site_aniso_U_13 
 _atom_site_aniso_U_12 
Gd 0.00950(12) 0.00817(12) 0.01459(12) 0.00039(7) -0.00068(7) -0.00031(6) 
O1 0.0149(13) 0.0095(13) 0.028(2) 0.0000(11) -0.0009(11) -0.0034(10) 
C1 0.011(2) 0.013(2) 0.014(2) 0.0005(14) -0.0016(14) 0.0003(13) 
O2 0.0133(12) 0.0073(12) 0.0224(14) 0.0019(10) 0.0017(11) 0.0013(10) 
C2 0.013(2) 0.009(2) 0.011(2) -0.0020(13) 0.0008(13) -0.0028(13) 
O3 0.0126(12) 0.0131(14) 0.0249(15) -0.0001(11) 0.0003(11) -0.0035(10) 
C3 0.014(2) 0.012(2) 0.012(2) 0.0005(13) 0.0008(14) -0.0009(14) 
O4 0.0118(13) 0.0142(13) 0.0207(14) 0.0026(10) -0.0014(11) 0.0033(10) 
C4 0.009(2) 0.015(2) 0.012(2) 0.0001(13) 0.0006(13) 0.0004(13) 
O5 0.0156(13) 0.0168(14) 0.0232(14) -0.0001(11) -0.0025(11) 0.0026(11) 
O6 0.0142(13) 0.029(2) 0.0218(15) 0.0067(12) 0.0040(11) 0.0022(12) 
O7 0.0179(14) 0.0148(14) 0.0174(14) -0.0009(10) -0.0030(11) -0.0003(10) 
O8 0.0140(13) 0.0192(15) 0.025(2) 0.0025(11) 0.0033(11) 0.0030(11) 
O9 0.0206(14) 0.032(2) 0.0182(14) 0.0049(12) 0.0013(11) 0.0036(13) 
O10 0.029(2) 0.0163(15) 0.025(2) -0.0033(11) -0.0099(13) -0.0037(12) 
O11 0.0186(15) 0.036(2) 0.021(2) 0.0021(12) 0.0000(12) -0.0074(12) 
C11 0.017(2) 0.021(2) 0.023(2) 0.002(2) 0.000(2) -0.001(2) 
O12 0.0195(14) 0.030(2) 0.0152(13) 0.0014(12) -0.0001(11) -0.0041(12) 
C12 0.019(2) 0.019(2) 0.019(2) 0.001(2) 0.001(2) 0.000(2) 
O13 0.0162(14) 0.035(2) 0.0226(15) 0.0007(13) -0.0014(11) -0.0073(13) 
C13 0.015(2) 0.026(2) 0.016(2) 0.000(2) -0.0004(15) 0.000(2) 
C14 0.022(2) 0.020(2) 0.016(2) 0.001(2) 0.000(2) -0.001(2) 
N15 0.024(2) 0.031(2) 0.017(2) 0.0007(15) -0.0009(14) -0.001(2) 
C16 0.043(3) 0.044(3) 0.023(2) -0.002(2) 0.003(2) -0.010(2) 
C17 0.057(3) 0.041(3) 0.021(2) -0.003(2) -0.001(2) -0.001(3) 
C18 0.043(3) 0.034(3) 0.030(3) -0.008(2) -0.013(2) 0.011(2) 
C19 0.028(3) 0.071(4) 0.034(3) -0.011(3) -0.006(2) -0.003(3) 
C20 0.029(2) 0.066(4) 0.023(2) -0.002(2) -0.002(2) -0.010(2) 
C21 0.029(2) 0.022(2) 0.015(2) -0.002(2) -0.002(2) 0.004(2) 
O30 0.0162(13) 0.0143(14) 0.026(2) -0.0007(11) 0.0036(12) 0.0002(10) 
O40 0.045(2) 0.028(2) 0.033(2) 0.0034(14) 0.000(2) -0.0039(15) 
O50 0.033(2) 0.052(2) 0.037(2) -0.011(2) 0.002(2) 0.005(2) 
O60 0.040(2) 0.044(2) 0.045(2) -0.002(2) 0.002(2) 0.002(2) 
 
_geom_special_details 
; 
 All esds (except the esd in the dihedral angle between two l.s. planes) 
 are estimated using the full covariance matrix.  The cell esds are taken 
 into account individually in the estimation of esds in distances, angles 
 and torsion angles; correlations between esds in cell parameters are only 
 used when they are defined by crystal symmetry.  An approximate (isotropic) 
 treatment of cell esds is used for estimating esds involving l.s. planes. 
; 
 
loop_ 
 _geom_bond_atom_site_label_1 
 _geom_bond_atom_site_label_2 
 _geom_bond_distance 
 _geom_bond_site_symmetry_2 
 _geom_bond_publ_flag 
Gd O1 2.311(3) . ? 
Gd O2 2.352(3) 1_545 ? 
Gd O8 2.381(3) . ? 
Gd O6 2.395(3) . ? 
Gd O7 2.405(3) . ? 
Gd O10 2.414(3) . ? 
Gd O5 2.414(3) . ? 
Gd O9 2.465(3) . ? 
O1 C1 1.255(5) . ? 
C1 C2 1.451(5) . ? 
C1 C4 1.477(5) . ? 
O2 C2 1.275(4) . ? 
O2 Gd 2.352(2) 1_565 ? 
C2 C3 1.449(5) . ? 
O3 C3 1.259(4) . ? 
C3 C4 1.473(5) . ? 
O4 C4 1.242(4) . ? 
O11 C11 1.254(5) . ? 
C11 C14 1.442(6) . ? 
C11 C12 1.472(6) . ? 
O12 C12 1.248(5) . ? 
C12 C13 1.469(5) . ? 
O13 C13 1.250(5) . ? 
C13 C14 1.452(6) . ? 
C14 N15 1.337(5) . ? 
N15 C21 1.419(4) . ? 
C16 C17 1.39 . ? 
C16 C21 1.39 . ? 
C17 C18 1.39 . ? 
C18 C19 1.39 . ? 
C19 C20 1.39 . ? 
C20 C21 1.39 . ? 
 
loop_ 
 _geom_angle_atom_site_label_1 
 _geom_angle_atom_site_label_2 
 _geom_angle_atom_site_label_3 
 _geom_angle 
 _geom_angle_site_symmetry_1 
 _geom_angle_site_symmetry_3 
 _geom_angle_publ_flag 
O1 Gd O2 145.02(10) . 1_545 ? 
O1 Gd O8 81.94(10) . . ? 
O2 Gd O8 76.58(9) 1_545 . ? 
O1 Gd O6 108.24(10) . . ? 
O2 Gd O6 78.74(10) 1_545 . ? 
O8 Gd O6 148.00(10) . . ? 
O1 Gd O7 73.39(9) . . ? 
O2 Gd O7 75.89(9) 1_545 . ? 
O8 Gd O7 79.93(10) . . ? 
O6 Gd O7 74.52(10) . . ? 
O1 Gd O10 143.39(10) . . ? 
O2 Gd O10 70.43(9) 1_545 . ? 
O8 Gd O10 107.41(11) . . ? 
O6 Gd O10 82.77(11) . . ? 
O7 Gd O10 142.35(10) . . ? 
O1 Gd O5 73.29(9) . . ? 
O2 Gd O5 139.18(9) 1_545 . ? 
O8 Gd O5 138.24(10) . . ? 
O6 Gd O5 73.06(9) . . ? 
O7 Gd O5 122.28(9) . . ? 
O10 Gd O5 77.17(10) . . ? 
O1 Gd O9 77.71(10) . . ? 
O2 Gd O9 119.66(10) 1_545 . ? 
O8 Gd O9 71.37(10) . . ? 
O6 Gd O9 139.75(9) . . ? 
O7 Gd O9 141.59(10) . . ? 
O10 Gd O9 72.46(10) . . ? 
O5 Gd O9 70.84(9) . . ? 
C1 O1 Gd 151.3(3) . . ? 
O1 C1 C2 132.1(3) . . ? 
O1 C1 C4 137.8(3) . . ? 
C2 C1 C4 90.2(3) . . ? 
C2 O2 Gd 143.2(2) . 1_565 ? 
O2 C2 C3 136.3(3) . . ? 
O2 C2 C1 133.0(3) . . ? 
C3 C2 C1 90.6(3) . . ? 
O3 C3 C2 134.8(3) . . ? 
O3 C3 C4 134.7(3) . . ? 
C2 C3 C4 90.4(3) . . ? 
O4 C4 C3 134.4(3) . . ? 
O4 C4 C1 136.9(3) . . ? 
C3 C4 C1 88.7(3) . . ? 
O11 C11 C14 135.1(4) . . ? 
O11 C11 C12 135.1(4) . . ? 
C14 C11 C12 89.8(3) . . ? 
O12 C12 C13 135.2(4) . . ? 
O12 C12 C11 135.4(4) . . ? 
C13 C12 C11 89.4(3) . . ? 
O13 C13 C14 137.7(4) . . ? 
O13 C13 C12 132.8(4) . . ? 
C14 C13 C12 89.5(3) . . ? 
N15 C14 C11 127.9(4) . . ? 
N15 C14 C13 140.8(4) . . ? 
C11 C14 C13 91.3(3) . . ? 
C14 N15 C21 128.6(3) . . ? 
C17 C16 C21 120.0 . . ? 
C16 C17 C18 120.0 . . ? 
C19 C18 C17 120.0 . . ? 
C18 C19 C20 120.0 . . ? 
C19 C20 C21 120.0 . . ? 
C20 C21 C16 120.0 . . ? 
C20 C21 N15 123.1(2) . . ? 
C16 C21 N15 116.9(2) . . ? 
 
_refine_diff_density_max    1.889 
_refine_diff_density_min   -1.547 
_refine_diff_density_rms    0.149 

#===END

 
data_Compound 7
 
_audit_creation_method            SHELXL 
_chemical_name_systematic 
; 
 ? 
; 
_chemical_name_common             ? 
_chemical_formula_moiety          ? 
_chemical_formula_structural      ? 
_chemical_formula_analytical      ? 
_chemical_formula_sum             'C14 H26 N O17 Tb' 
_chemical_formula_weight          639.28 
_chemical_melting_point           ? 
_chemical_compound_source         ? 
 
loop_ 
 _atom_type_symbol 
 _atom_type_description 
 _atom_type_scat_dispersion_real 
 _atom_type_scat_dispersion_imag 
 _atom_type_scat_source 
 'C'  'C'   0.0033   0.0016 
 'International Tables Vol C Tables 4.2.6.8 and 6.1.1.4' 
 'H'  'H'   0.0000   0.0000 
 'International Tables Vol C Tables 4.2.6.8 and 6.1.1.4' 
 'N'  'N'   0.0061   0.0033 
 'International Tables Vol C Tables 4.2.6.8 and 6.1.1.4' 
 'O'  'O'   0.0106   0.0060 
 'International Tables Vol C Tables 4.2.6.8 and 6.1.1.4' 
 'Tb'  'Tb'  -0.1723   4.1537 
 'International Tables Vol C Tables 4.2.6.8 and 6.1.1.4' 
 
_symmetry_cell_setting            ? 
_symmetry_space_group_name_H-M    ? 
 
loop_ 
 _symmetry_equiv_pos_as_xyz 
 'x, y, z' 
 '-x+1/2, y, -z' 
 'x+1/2, y+1/2, z+1/2' 
 '-x+1, y+1/2, -z+1/2' 
 '-x, -y, -z' 
 'x-1/2, -y, z' 
 '-x+1/2, -y+1/2, -z+1/2' 
 'x, -y+1/2, z+1/2' 
 
_cell_length_a                    16.5424(6) 
_cell_length_b                    7.5852(3) 
_cell_length_c                    35.4632(14) 
_cell_angle_alpha                 90.00 
_cell_angle_beta                  96.457(2) 
_cell_angle_gamma                 90.00 
_cell_volume                      4421.6(3) 
_cell_formula_units_Z             8 
_cell_measurement_temperature     150(2) 
_cell_measurement_reflns_used     ? 
_cell_measurement_theta_min       ? 
_cell_measurement_theta_max       ? 
 
_exptl_crystal_description        ? 
_exptl_crystal_colour             ? 
_exptl_crystal_size_max           ? 
_exptl_crystal_size_mid           ? 
_exptl_crystal_size_min           ? 
_exptl_crystal_density_meas       ? 
_exptl_crystal_density_diffrn     1.921 
_exptl_crystal_density_method     ? 
_exptl_crystal_F_000              2544 
_exptl_absorpt_coefficient_mu     3.284 
_exptl_absorpt_correction_type    ? 
_exptl_absorpt_correction_T_min   ? 
_exptl_absorpt_correction_T_max   ? 
 
_exptl_special_details 
; 
 ? 
; 
 
_diffrn_ambient_temperature       150(2) 
_diffrn_radiation_wavelength      0.71073 
_diffrn_radiation_type            MoK\a 
_diffrn_radiation_source          'fine-focus sealed tube' 
_diffrn_radiation_monochromator   graphite 
_diffrn_measurement_device        ? 
_diffrn_measurement_method        ? 
_diffrn_standards_number          ? 
_diffrn_standards_interval_count  ? 
_diffrn_standards_interval_time   ? 
_diffrn_standards_decay_%         ? 
_diffrn_reflns_number             14048 
_diffrn_reflns_av_R_equivalents   0.0536 
_diffrn_reflns_av_sigmaI/netI     0.0744 
_diffrn_reflns_limit_h_min        -21 
_diffrn_reflns_limit_h_max        21 
_diffrn_reflns_limit_k_min        -9 
_diffrn_reflns_limit_k_max        9 
_diffrn_reflns_limit_l_min        -45 
_diffrn_reflns_limit_l_max        46 
_diffrn_reflns_theta_min          2.61 
_diffrn_reflns_theta_max          27.56 
_reflns_number_total              5045 
_reflns_number_observed           4038 
_reflns_observed_criterion        >2sigma(I) 
 
_computing_data_collection        ? 
_computing_cell_refinement        ? 
_computing_data_reduction         ? 
_computing_structure_solution     'SHELXS-86 (Sheldrick, 1990)' 
_computing_structure_refinement   'SHELXL-93 (Sheldrick, 1993)' 
_computing_molecular_graphics     ? 
_computing_publication_material   ? 
 
_refine_special_details 
; 
 Refinement on F^2^ for ALL reflections except for 285 with very negative F^2^ 
 or flagged by the user for potential systematic errors.  Weighted R-factors 
 wR and all goodnesses of fit S are based on F^2^, conventional R-factors R 
 are based on F, with F set to zero for negative F^2^. The observed criterion 
 of F^2^ > 2sigma(F^2^) is used only for calculating _R_factor_obs etc. and is 
 not relevant to the choice of reflections for refinement.  R-factors based 
 on F^2^ are statistically about twice as large as those based on F, and R- 
 factors based on ALL data will be even larger. 
; 
 
_refine_ls_structure_factor_coef  Fsqd  
_refine_ls_matrix_type            full 
_refine_ls_weighting_scheme 
 'calc w=1/[\s^2^(Fo^2^)+(0.0346P)^2^+4.3406P] where P=(Fo^2^+2Fc^2^)/3' 
_atom_sites_solution_primary      direct 
_atom_sites_solution_secondary    difmap 
_atom_sites_solution_hydrogens    geom 
_refine_ls_hydrogen_treatment     ? 
_refine_ls_extinction_method      SHELXL 
_refine_ls_extinction_coef        0.00050(8) 
_refine_ls_extinction_expression 
 'Fc^*^=kFc[1+0.001xFc^2^\l^3^/sin(2\q)]^-1/4^' 
_refine_ls_number_reflns          4760 
_refine_ls_number_parameters      287 
_refine_ls_number_restraints      0 
_refine_ls_R_factor_all           0.0550 
_refine_ls_R_factor_obs           0.0393 
_refine_ls_wR_factor_all          0.1027 
_refine_ls_wR_factor_obs          0.0929 
_refine_ls_goodness_of_fit_all    1.068 
_refine_ls_goodness_of_fit_obs    1.116 
_refine_ls_restrained_S_all       1.097 
_refine_ls_restrained_S_obs       1.116 
_refine_ls_shift/esd_max          0.002 
_refine_ls_shift/esd_mean         0.000 
 
loop_ 
 _atom_site_label 
 _atom_site_type_symbol 
 _atom_site_fract_x 
 _atom_site_fract_y 
 _atom_site_fract_z 
 _atom_site_U_iso_or_equiv 
 _atom_site_thermal_displace_type 
 _atom_site_occupancy 
 _atom_site_calc_flag 
 _atom_site_refinement_flags 
 _atom_site_disorder_group 
Tb Tb 0.079316(12) 0.34141(3) 0.931699(6) 0.01505(11) Uani 1 d . . 
O1 O 0.1198(2) 0.6274(4) 0.94412(10) 0.0215(7) Uani 1 d . . 
C1 C 0.1737(3) 0.7439(6) 0.94850(13) 0.0163(9) Uani 1 d . . 
O2 O 0.1106(2) 1.0437(4) 0.94338(9) 0.0179(7) Uani 1 d . . 
C2 C 0.1703(3) 0.9347(6) 0.94757(12) 0.0168(10) Uani 1 d . . 
O3 O 0.3089(2) 1.0700(4) 0.95565(9) 0.0209(7) Uani 1 d . . 
C3 C 0.2581(3) 0.9449(6) 0.95379(12) 0.0151(9) Uani 1 d . . 
O4 O 0.3202(2) 0.6463(4) 0.96502(9) 0.0201(7) Uani 1 d . . 
C4 C 0.2632(3) 0.7525(7) 0.95690(13) 0.0171(10) Uani 1 d . . 
O5 O -0.0384(2) 0.5228(5) 0.91593(9) 0.0233(7) Uani 1 d . . 
O6 O -0.0167(2) 0.2634(5) 0.97425(9) 0.0242(8) Uani 1 d . . 
O7 O 0.1543(2) 0.3426(4) 0.99345(9) 0.0212(7) Uani 1 d . . 
O8 O 0.2135(2) 0.3170(5) 0.91540(9) 0.0225(8) Uani 1 d . . 
O9 O 0.0830(2) 0.4622(5) 0.86778(9) 0.0292(8) Uani 1 d . . 
O10 O -0.0065(2) 0.1604(5) 0.88887(10) 0.0275(8) Uani 1 d . . 
O11 O 0.0619(2) -0.1489(5) 0.67707(10) 0.0297(9) Uani 1 d . . 
C11 C 0.1337(3) -0.0946(7) 0.68123(14) 0.0240(11) Uani 1 d . . 
O12 O 0.1924(2) -0.0399(5) 0.61972(9) 0.0259(8) Uani 1 d . . 
C12 C 0.1930(3) -0.0455(7) 0.65499(14) 0.0247(11) Uani 1 d . . 
O13 O 0.3244(2) 0.0468(6) 0.69068(10) 0.0310(9) Uani 1 d . . 
C13 C 0.2515(3) -0.0051(7) 0.68794(14) 0.0248(11) Uani 1 d . . 
C14 C 0.1921(3) -0.0514(7) 0.71272(14) 0.0255(11) Uani 1 d . . 
N15 N 0.1827(3) -0.0594(7) 0.74982(12) 0.0305(11) Uani 1 d . . 
C16 C 0.2135(2) -0.0330(6) 0.81724(9) 0.044(2) Uani 1 d G . 
H16A H 0.1616(2) -0.0827(6) 0.81969(9) 0.053 Uiso 1 calc R . 
C17 C 0.2644(2) 0.0155(6) 0.84944(7) 0.046(2) Uani 1 d G . 
H17A H 0.2473(3) -0.0010(9) 0.87389(8) 0.055 Uiso 1 calc R . 
C18 C 0.3403(2) 0.0882(6) 0.84586(8) 0.043(2) Uani 1 d G . 
H18A H 0.3750(3) 0.1214(9) 0.86786(10) 0.051 Uiso 1 calc R . 
C19 C 0.3652(2) 0.1125(7) 0.81008(10) 0.054(2) Uani 1 d G . 
H19A H 0.4171(2) 0.1621(10) 0.80764(15) 0.065 Uiso 1 calc R . 
C20 C 0.3143(2) 0.0639(6) 0.77789(8) 0.045(2) Uani 1 d G . 
H20A H 0.3314(3) 0.0805(9) 0.75343(9) 0.054 Uiso 1 calc R . 
C21 C 0.2384(2) -0.0088(6) 0.78146(8) 0.0304(12) Uani 1 d G . 
O30 O 0.4685(2) 0.1550(4) 0.95230(10) 0.0223(7) Uani 1 d . . 
O40 O 0.5496(3) 0.1525(5) 0.86494(12) 0.0401(10) Uani 1 d . . 
O50 O 0.4524(3) 0.3059(7) 0.72142(13) 0.0511(12) Uani 1 d . . 
O60 O 0.4445(3) 0.7767(7) 0.71322(14) 0.0538(12) Uani 1 d . . 
 
loop_ 
 _atom_site_aniso_label 
 _atom_site_aniso_U_11 
 _atom_site_aniso_U_22 
 _atom_site_aniso_U_33 
 _atom_site_aniso_U_23 
 _atom_site_aniso_U_13 
 _atom_site_aniso_U_12 
Tb 0.01488(14) 0.01067(15) 0.01930(15) 0.00043(9) 0.00069(9) -0.00019(9) 
O1 0.020(2) 0.009(2) 0.035(2) 0.0005(14) -0.0009(15) -0.0032(13) 
C1 0.016(2) 0.015(3) 0.017(2) -0.002(2) 0.002(2) 0.001(2) 
O2 0.020(2) 0.008(2) 0.026(2) 0.0027(14) 0.0042(13) 0.0031(13) 
C2 0.019(2) 0.017(3) 0.013(2) 0.001(2) 0.001(2) 0.000(2) 
O3 0.016(2) 0.015(2) 0.031(2) -0.0006(15) 0.0018(14) -0.0038(13) 
C3 0.016(2) 0.016(3) 0.014(2) -0.003(2) 0.002(2) -0.003(2) 
O4 0.019(2) 0.016(2) 0.025(2) 0.0020(14) 0.0007(14) 0.0034(13) 
C4 0.016(2) 0.018(3) 0.018(2) 0.000(2) 0.005(2) 0.001(2) 
O5 0.020(2) 0.019(2) 0.030(2) 0.001(2) -0.0013(14) 0.0042(14) 
O6 0.018(2) 0.029(2) 0.027(2) 0.006(2) 0.0060(14) 0.0036(15) 
O7 0.021(2) 0.018(2) 0.024(2) -0.0012(14) -0.0011(14) -0.0013(13) 
O8 0.021(2) 0.020(2) 0.026(2) 0.0028(14) 0.0062(14) 0.0000(14) 
O9 0.028(2) 0.036(2) 0.023(2) 0.005(2) 0.0019(14) 0.002(2) 
O10 0.034(2) 0.017(2) 0.029(2) -0.0016(15) -0.009(2) -0.0051(15) 
O11 0.023(2) 0.040(3) 0.026(2) 0.004(2) 0.0001(15) -0.005(2) 
C11 0.024(3) 0.024(3) 0.024(2) 0.000(2) 0.004(2) -0.002(2) 
O12 0.025(2) 0.031(2) 0.022(2) 0.002(2) 0.0011(14) -0.005(2) 
C12 0.025(2) 0.022(3) 0.026(3) 0.002(2) -0.001(2) 0.002(2) 
O13 0.021(2) 0.042(3) 0.029(2) -0.002(2) 0.0014(15) -0.007(2) 
C13 0.026(2) 0.023(3) 0.026(2) -0.003(2) 0.001(2) -0.001(2) 
C14 0.027(2) 0.026(3) 0.023(2) 0.000(2) 0.001(2) -0.002(2) 
N15 0.033(2) 0.034(3) 0.024(2) 0.000(2) 0.000(2) 0.000(2) 
C16 0.057(4) 0.052(4) 0.025(3) -0.006(3) 0.008(3) -0.004(3) 
C17 0.065(4) 0.046(4) 0.026(3) -0.002(3) 0.002(3) 0.001(4) 
C18 0.049(4) 0.046(4) 0.030(3) -0.004(3) -0.012(3) 0.016(3) 
C19 0.039(4) 0.084(6) 0.036(3) -0.012(4) -0.010(3) -0.002(4) 
C20 0.037(3) 0.064(5) 0.031(3) -0.005(3) -0.005(3) -0.008(3) 
C21 0.038(3) 0.028(3) 0.023(2) -0.005(2) -0.005(2) 0.007(2) 
O30 0.023(2) 0.017(2) 0.027(2) -0.0007(14) 0.0013(14) -0.0009(13) 
O40 0.056(3) 0.027(2) 0.036(2) 0.002(2) 0.003(2) -0.007(2) 
O50 0.045(3) 0.060(3) 0.048(3) -0.011(2) 0.006(2) 0.007(2) 
O60 0.051(3) 0.055(3) 0.056(3) -0.002(3) 0.005(2) 0.002(2) 
 
_geom_special_details 
; 
 All esds (except the esd in the dihedral angle between two l.s. planes) 
 are estimated using the full covariance matrix.  The cell esds are taken 
 into account individually in the estimation of esds in distances, angles 
 and torsion angles; correlations between esds in cell parameters are only 
 used when they are defined by crystal symmetry.  An approximate (isotropic) 
 treatment of cell esds is used for estimating esds involving l.s. planes. 
; 
 
loop_ 
 _geom_bond_atom_site_label_1 
 _geom_bond_atom_site_label_2 
 _geom_bond_distance 
 _geom_bond_site_symmetry_2 
 _geom_bond_publ_flag 
Tb O1 2.298(3) . ? 
Tb O2 2.343(3) 1_545 ? 
Tb O8 2.363(3) . ? 
Tb O6 2.385(3) . ? 
Tb O7 2.392(3) . ? 
Tb O10 2.392(4) . ? 
Tb O5 2.399(3) . ? 
Tb O9 2.452(3) . ? 
O1 C1 1.252(6) . ? 
C1 C2 1.448(7) . ? 
C1 C4 1.480(6) . ? 
O2 C2 1.283(5) . ? 
O2 Tb 2.343(3) 1_565 ? 
C2 C3 1.446(6) . ? 
O3 C3 1.265(5) . ? 
C3 C4 1.466(7) . ? 
O4 C4 1.249(6) . ? 
O11 C11 1.250(6) . ? 
C11 C14 1.431(7) . ? 
C11 C12 1.475(7) . ? 
O12 C12 1.250(6) . ? 
C12 C13 1.463(7) . ? 
O13 C13 1.261(6) . ? 
C13 C14 1.434(7) . ? 
C14 N15 1.343(6) . ? 
N15 C21 1.422(5) . ? 
C16 C17 1.39 . ? 
C16 C21 1.39 . ? 
C17 C18 1.39 . ? 
C18 C19 1.39 . ? 
C19 C20 1.39 . ? 
C20 C21 1.39 . ? 
 
loop_ 
 _geom_angle_atom_site_label_1 
 _geom_angle_atom_site_label_2 
 _geom_angle_atom_site_label_3 
 _geom_angle 
 _geom_angle_site_symmetry_1 
 _geom_angle_site_symmetry_3 
 _geom_angle_publ_flag 
O1 Tb O2 145.27(12) . 1_545 ? 
O1 Tb O8 81.91(12) . . ? 
O2 Tb O8 76.87(11) 1_545 . ? 
O1 Tb O6 108.26(12) . . ? 
O2 Tb O6 78.39(11) 1_545 . ? 
O8 Tb O6 147.79(12) . . ? 
O1 Tb O7 73.19(12) . . ? 
O2 Tb O7 76.14(11) 1_545 . ? 
O8 Tb O7 79.60(11) . . ? 
O6 Tb O7 74.67(11) . . ? 
O1 Tb O10 143.41(12) . . ? 
O2 Tb O10 70.28(12) 1_545 . ? 
O8 Tb O10 107.84(12) . . ? 
O6 Tb O10 82.49(12) . . ? 
O7 Tb O10 142.46(12) . . ? 
O1 Tb O5 73.44(12) . . ? 
O2 Tb O5 138.71(12) 1_545 . ? 
O8 Tb O5 138.45(12) . . ? 
O6 Tb O5 73.06(11) . . ? 
O7 Tb O5 122.35(11) . . ? 
O10 Tb O5 76.87(12) . . ? 
O1 Tb O9 77.74(13) . . ? 
O2 Tb O9 119.70(12) 1_545 . ? 
O8 Tb O9 71.42(11) . . ? 
O6 Tb O9 139.91(11) . . ? 
O7 Tb O9 141.31(12) . . ? 
O10 Tb O9 72.68(13) . . ? 
O5 Tb O9 70.98(11) . . ? 
C1 O1 Tb 151.4(3) . . ? 
O1 C1 C2 132.6(4) . . ? 
O1 C1 C4 137.6(5) . . ? 
C2 C1 C4 89.8(4) . . ? 
C2 O2 Tb 142.5(3) . 1_565 ? 
O2 C2 C3 136.8(5) . . ? 
O2 C2 C1 132.4(4) . . ? 
C3 C2 C1 90.8(4) . . ? 
O3 C3 C2 134.4(4) . . ? 
O3 C3 C4 135.2(4) . . ? 
C2 C3 C4 90.4(4) . . ? 
O4 C4 C3 134.1(4) . . ? 
O4 C4 C1 137.0(5) . . ? 
C3 C4 C1 88.8(4) . . ? 
O11 C11 C14 135.9(4) . . ? 
O11 C11 C12 134.4(5) . . ? 
C14 C11 C12 89.7(4) . . ? 
O12 C12 C13 136.3(4) . . ? 
O12 C12 C11 135.1(5) . . ? 
C13 C12 C11 88.6(4) . . ? 
O13 C13 C14 138.1(5) . . ? 
O13 C13 C12 131.8(4) . . ? 
C14 C13 C12 90.1(4) . . ? 
N15 C14 C11 127.7(5) . . ? 
N15 C14 C13 140.7(5) . . ? 
C11 C14 C13 91.6(4) . . ? 
C14 N15 C21 128.6(4) . . ? 
C17 C16 C21 120.0 . . ? 
C16 C17 C18 120.0 . . ? 
C17 C18 C19 120.0 . . ? 
C20 C19 C18 120.0 . . ? 
C19 C20 C21 120.0 . . ? 
C20 C21 C16 120.0 . . ? 
C20 C21 N15 123.1(3) . . ? 
C16 C21 N15 116.9(3) . . ? 
 
_refine_diff_density_max    1.953 
_refine_diff_density_min   -1.501 
_refine_diff_density_rms    0.166 

#===END

 
data_Compound 8
  
_audit_creation_method            SHELXL 
_chemical_name_systematic 
; 
 ? 
; 
_chemical_name_common             ? 
_chemical_formula_moiety          ? 
_chemical_formula_structural      ? 
_chemical_formula_analytical      ? 
_chemical_formula_sum             'C12 H26 La2 O25' 
_chemical_formula_weight          848.15 
_chemical_melting_point           ? 
_chemical_compound_source         ? 
  
loop_ 
 _atom_type_symbol 
 _atom_type_description 
 _atom_type_scat_dispersion_real 
 _atom_type_scat_dispersion_imag 
 _atom_type_scat_source 
 'C'  'C'   0.0033   0.0016 
 'International Tables Vol C Tables 4.2.6.8 and 6.1.1.4' 
 'H'  'H'   0.0000   0.0000 
 'International Tables Vol C Tables 4.2.6.8 and 6.1.1.4' 
 'O'  'O'   0.0106   0.0060 
 'International Tables Vol C Tables 4.2.6.8 and 6.1.1.4' 
 'La'  'La'  -0.2871   2.4523 
 'International Tables Vol C Tables 4.2.6.8 and 6.1.1.4' 
  
_symmetry_cell_setting            Monoclinic 
_symmetry_space_group_name_H-M    P2(1)/c 
  
loop_ 
 _symmetry_equiv_pos_as_xyz 
 'x, y, z' 
 '-x, y+1/2, -z+1/2' 
 '-x, -y, -z' 
 'x, -y-1/2, z-1/2' 
  
_cell_length_a                    9.66820(10) 
_cell_length_b                    15.3770(3) 
_cell_length_c                    16.4646(3) 
_cell_angle_alpha                 90.00 
_cell_angle_beta                  90.1073(7) 
_cell_angle_gamma                 90.00 
_cell_volume                      2447.75(7) 
_cell_formula_units_Z             4 
_cell_measurement_temperature     150(2) 
_cell_measurement_reflns_used     ? 
_cell_measurement_theta_min       ? 
_cell_measurement_theta_max       ? 
  
_exptl_crystal_description        plates 
_exptl_crystal_colour             Colourless 
_exptl_crystal_size_max           0.35 
_exptl_crystal_size_mid           0.24 
_exptl_crystal_size_min           0.20 
_exptl_crystal_density_meas       ? 
_exptl_crystal_density_diffrn     2.302 
_exptl_crystal_density_method     ? 
_exptl_crystal_F_000              1648 
_exptl_absorpt_coefficient_mu     3.557 
_exptl_absorpt_correction_type    Empirical 
_exptl_absorpt_correction_T_min   0.3691 
_exptl_absorpt_correction_T_max   0.5364 
  
_exptl_special_details 
; 
 ? 
; 
  
_diffrn_ambient_temperature       150(2) 
_diffrn_radiation_wavelength      0.71073 
_diffrn_radiation_type            MoK\a 
_diffrn_radiation_source          'fine-focus sealed tube' 
_diffrn_radiation_monochromator   graphite 
_diffrn_measurement_device        'Nonius Kappa CCD' 
_diffrn_measurement_method        '\w scans' 
_diffrn_standards_number          ? 
_diffrn_standards_interval_count  ? 
_diffrn_standards_interval_time   ? 
_diffrn_standards_decay_%         ? 
_diffrn_reflns_number             31716 
_diffrn_reflns_av_R_equivalents   0.0565 
_diffrn_reflns_av_sigmaI/netI     0.0405 
_diffrn_reflns_limit_h_min        -12 
_diffrn_reflns_limit_h_max        12 
_diffrn_reflns_limit_k_min        -19 
_diffrn_reflns_limit_k_max        19 
_diffrn_reflns_limit_l_min        -19 
_diffrn_reflns_limit_l_max        21 
_diffrn_reflns_theta_min          2.78 
_diffrn_reflns_theta_max          27.50 
_reflns_number_total              5612 
_reflns_number_observed           4771 
_reflns_observed_criterion        >2sigma(I) 
  
_computing_data_collection        ? 
_computing_cell_refinement        ? 
_computing_data_reduction         'Siemens SHELXTL' 
_computing_structure_solution     'SHELXS-86 (Sheldrick, 1990)' 
_computing_structure_refinement   'SHELXL-93 (Sheldrick, 1993)' 
_computing_molecular_graphics     'Siemens SHELXTL' 
_computing_publication_material   'Siemens SHELXTL' 
  
_refine_special_details 
; 
 Refinement on F^2^ for ALL reflections except for 230 with very negative F^2^ 
 or flagged by the user for potential systematic errors.  Weighted R-factors 
 wR and all goodnesses of fit S are based on F^2^, conventional R-factors R 
 are based on F, with F set to zero for negative F^2^. The observed criterion 
 of F^2^ > 2sigma(F^2^) is used only for calculating _R_factor_obs etc. and is 
 not relevant to the choice of reflections for refinement.  R-factors based 
 on F^2^ are statistically about twice as large as those based on F, and R- 
 factors based on ALL data will be even larger. 
; 
  
_refine_ls_structure_factor_coef  Fsqd 
_refine_ls_matrix_type            full 
_refine_ls_weighting_scheme 
 'calc w=1/[\s^2^(Fo^2^)+(0.0426P)^2^+1.5758P] where P=(Fo^2^+2Fc^2^)/3' 
_atom_sites_solution_primary      direct 
_atom_sites_solution_secondary    difmap 
_atom_sites_solution_hydrogens    geom 
_refine_ls_hydrogen_treatment     ? 
_refine_ls_extinction_method      SHELXL 
_refine_ls_extinction_coef        0.00083(12) 
_refine_ls_extinction_expression 
 'Fc^*^=kFc[1+0.001xFc^2^\l^3^/sin(2\q)]^-1/4^' 
_refine_ls_number_reflns          5382 
_refine_ls_number_parameters      457 
_refine_ls_number_restraints      26 
_refine_ls_R_factor_all           0.0380 
_refine_ls_R_factor_obs           0.0300 
_refine_ls_wR_factor_all          0.0815 
_refine_ls_wR_factor_obs          0.0751 
_refine_ls_goodness_of_fit_all    1.047 
_refine_ls_goodness_of_fit_obs    1.077 
_refine_ls_restrained_S_all       1.068 
_refine_ls_restrained_S_obs       1.073 
_refine_ls_shift/esd_max          -0.004 
_refine_ls_shift/esd_mean         0.000 
  
loop_ 
 _atom_site_label 
 _atom_site_type_symbol 
 _atom_site_fract_x 
 _atom_site_fract_y 
 _atom_site_fract_z 
 _atom_site_U_iso_or_equiv 
 _atom_site_thermal_displace_type 
 _atom_site_occupancy 
 _atom_site_calc_flag 
 _atom_site_refinement_flags 
 _atom_site_disorder_group 
La1 La 0.70057(2) 0.587108(10) 0.099013(10) 0.01031(8) Uani 1 d . . 
La2 La 0.72127(2) 0.092098(10) 0.098433(10) 0.01054(8) Uani 1 d . . 
C1 C 0.7977(3) 0.7927(2) 0.1843(2) 0.0124(6) Uani 1 d . . 
O1 O 0.7755(2) 0.73895(14) 0.12745(14) 0.0166(5) Uani 1 d . . 
C2 C 0.8078(3) 0.8876(2) 0.1875(2) 0.0118(6) Uani 1 d . . 
O2 O 0.7978(2) 0.94627(14) 0.13482(14) 0.0168(5) Uani 1 d . . 
C3 C 0.8301(3) 0.8840(2) 0.2746(2) 0.0123(6) Uani 1 d . . 
O3 O 0.8481(2) 0.94016(15) 0.32885(13) 0.0175(5) Uani 1 d . . 
C4 C 0.8200(3) 0.7879(2) 0.2717(2) 0.0137(6) Uani 1 d . . 
O4 O 0.8258(2) 0.72680(14) 0.32205(13) 0.0183(5) Uani 1 d . . 
C5 C 0.8248(3) 0.3877(2) 0.1845(2) 0.0114(6) Uani 1 d . . 
O5 O 0.8006(2) 0.44512(14) 0.13253(14) 0.0169(5) Uani 1 d . . 
C6 C 0.8306(3) 0.2929(2) 0.1809(2) 0.0119(6) Uani 1 d . . 
O6 O 0.8157(2) 0.23891(14) 0.12399(13) 0.0161(5) Uani 1 d . . 
C7 C 0.8531(3) 0.2893(2) 0.2685(2) 0.0130(6) Uani 1 d . . 
O7 O 0.8653(2) 0.22966(14) 0.31970(14) 0.0187(5) Uani 1 d . . 
C8 C 0.8487(3) 0.3844(2) 0.2720(2) 0.0133(6) Uani 1 d . . 
O8 O 0.8573(2) 0.44108(14) 0.32714(13) 0.0164(5) Uani 1 d . . 
C9 C 0.4909(3) 0.4052(2) 0.1454(2) 0.0132(6) Uani 1 d . . 
O9 O 0.4965(2) 0.48789(14) 0.14350(13) 0.0151(4) Uani 1 d . . 
C10 C 0.4687(3) 0.3361(2) 0.0852(2) 0.0147(6) Uani 1 d . . 
O10 O 0.4366(2) 0.33136(13) 0.01186(14) 0.0176(5) Uani 1 d . . 
C11 C 0.5048(3) 0.2710(2) 0.1476(2) 0.0134(6) Uani 1 d . . 
O11 O 0.5274(2) 0.19095(14) 0.14759(14) 0.0181(5) Uani 1 d . . 
C12 C 0.5090(3) 0.3404(2) 0.2094(2) 0.0127(6) Uani 1 d . . 
O12 O 0.5238(2) 0.34240(13) 0.28507(14) 0.0168(5) Uani 1 d . . 
O13 O 0.4982(2) 0.67103(15) 0.15876(15) 0.0185(5) Uani 1 d D . 
H13A H 0.4443(34) 0.6362(22) 0.1891(21) 0.036(12) Uiso 1 d D . 
H13B H 0.4993(52) 0.7277(8) 0.1723(29) 0.061(16) Uiso 1 d D . 
O14 O 0.8739(2) 0.6219(2) -0.01205(15) 0.0237(5) Uani 1 d D . 
H14A H 0.8715(64) 0.6009(32) -0.0631(12) 0.067(19) Uiso 1 d D . 
H14B H 0.9625(15) 0.6346(32) 0.0000(28) 0.044(13) Uiso 1 d D . 
O15 O 0.9508(3) 0.59080(14) 0.1555(2) 0.0194(5) Uani 1 d D . 
H15A H 0.9971(39) 0.5402(14) 0.1600(27) 0.039(13) Uiso 1 d D . 
H15B H 1.0005(35) 0.6381(16) 0.1692(24) 0.025(11) Uiso 1 d D . 
O16 O 0.6742(2) 0.47746(14) -0.01427(13) 0.0184(5) Uani 1 d D . 
H16A H 0.6206(36) 0.4819(29) -0.0588(15) 0.038(13) Uiso 1 d D . 
H16B H 0.7344(34) 0.4328(18) -0.0133(27) 0.035(12) Uiso 1 d D . 
O17 O 0.7044(2) 0.57905(14) 0.26028(14) 0.0147(5) Uani 1 d D . 
H17A H 0.7343(52) 0.6321(15) 0.2753(31) 0.061(16) Uiso 1 d D . 
H17B H 0.7628(36) 0.5393(21) 0.2811(26) 0.043(13) Uiso 1 d D . 
O18 O 0.5981(3) 0.1738(2) -0.0233(2) 0.0255(6) Uani 1 d D . 
H18A H 0.5375(38) 0.2182(20) -0.0245(32) 0.066(16) Uiso 1 d D . 
H18B H 0.6250(62) 0.1643(39) -0.0749(13) 0.095(23) Uiso 1 d D . 
O19 O 0.8980(3) 0.1158(2) -0.01356(15) 0.0250(5) Uani 1 d D . 
H19A H 0.8780(70) 0.1047(40) -0.0659(12) 0.089(23) Uiso 1 d D . 
H19B H 0.9804(24) 0.1354(32) 0.0041(29) 0.054(15) Uiso 1 d D . 
O20 O 0.9704(3) 0.09009(13) 0.1539(2) 0.0185(5) Uani 1 d D . 
H20A H 1.0111(38) 0.0390(13) 0.1659(25) 0.032(12) Uiso 1 d D . 
H20B H 1.0124(42) 0.1398(16) 0.1690(27) 0.040(13) Uiso 1 d D . 
O21 O 0.6693(2) -0.01447(15) -0.01354(14) 0.0197(5) Uani 1 d D . 
H21A H 0.7133(45) -0.0660(15) -0.0114(31) 0.051(14) Uiso 1 d D . 
H21B H 0.6195(43) -0.0124(34) -0.0597(16) 0.055(15) Uiso 1 d D . 
O22 O 0.5062(2) 0.00762(14) 0.14924(14) 0.0159(5) Uani 1 d D . 
H22A H 0.4604(37) 0.0411(23) 0.1850(20) 0.041(12) Uiso 1 d D . 
H22B H 0.5003(56) -0.0505(5) 0.1550(33) 0.069(17) Uiso 1 d D . 
O23 O 0.7223(2) 0.09211(13) 0.25853(15) 0.0155(5) Uani 1 d D . 
H23A H 0.7687(41) 0.1389(18) 0.2768(26) 0.042(13) Uiso 1 d D . 
H23B H 0.7538(43) 0.0423(15) 0.2805(25) 0.038(13) Uiso 1 d D . 
O30 O 0.8486(3) 0.33238(15) -0.0210(2) 0.0201(5) Uani 1 d D . 
H30A H 0.8486(59) 0.3025(31) 0.0260(17) 0.076(19) Uiso 1 d D . 
H30B H 0.8469(47) 0.3032(26) -0.0684(14) 0.042(13) Uiso 1 d D . 
O40 O 0.8235(3) 0.66720(14) 0.4820(2) 0.0198(5) Uani 1 d D . 
H40A H 0.8254(48) 0.6989(25) 0.4361(15) 0.042(13) Uiso 1 d D . 
H40B H 0.8049(51) 0.6992(28) 0.5265(18) 0.058(15) Uiso 1 d D . 
  
loop_ 
 _atom_site_aniso_label 
 _atom_site_aniso_U_11 
 _atom_site_aniso_U_22 
 _atom_site_aniso_U_33 
 _atom_site_aniso_U_23 
 _atom_site_aniso_U_13 
 _atom_site_aniso_U_12 
La1 0.01172(11) 0.00721(11) 0.01201(12) 0.00017(6) -0.00071(7) -0.00020(5) 
La2 0.01201(11) 0.00732(11) 0.01228(12) 0.00003(6) -0.00075(7) 0.00014(5) 
C1 0.0110(14) 0.0091(14) 0.0170(15) 0.0012(12) 0.0004(11) 0.0003(10) 
O1 0.0236(12) 0.0111(10) 0.0152(11) -0.0016(9) 0.0010(9) -0.0024(9) 
C2 0.0138(14) 0.0074(13) 0.0141(15) -0.0004(12) 0.0021(11) 0.0008(11) 
O2 0.0227(12) 0.0095(11) 0.0183(12) 0.0022(9) -0.0024(9) 0.0012(9) 
C3 0.0118(14) 0.0101(14) 0.0149(15) 0.0008(12) -0.0007(11) 0.0008(11) 
O3 0.0235(12) 0.0131(11) 0.0158(11) -0.0014(9) -0.0019(9) -0.0008(9) 
C4 0.0098(14) 0.0133(15) 0.018(2) 0.0011(12) -0.0007(11) -0.0003(11) 
O4 0.0262(12) 0.0117(11) 0.0171(11) 0.0027(9) -0.0010(9) -0.0009(9) 
C5 0.0097(14) 0.0089(14) 0.0157(15) -0.0010(12) -0.0005(11) -0.0008(11) 
O5 0.0220(12) 0.0091(11) 0.0196(12) 0.0026(9) -0.0018(9) 0.0017(9) 
C6 0.0085(13) 0.0103(14) 0.0170(15) 0.0004(12) -0.0007(11) -0.0003(10) 
O6 0.0212(12) 0.0097(10) 0.0173(11) -0.0002(8) -0.0004(9) 0.0001(8) 
C7 0.0096(13) 0.0126(15) 0.0169(15) 0.0005(12) -0.0008(11) -0.0010(11) 
O7 0.0255(12) 0.0111(11) 0.0194(12) 0.0048(9) -0.0033(9) 0.0005(9) 
C8 0.0097(14) 0.0112(14) 0.019(2) 0.0007(12) -0.0012(11) 0.0000(11) 
O8 0.0223(12) 0.0108(11) 0.0161(11) -0.0017(9) -0.0026(9) 0.0005(9) 
C9 0.0083(14) 0.0138(15) 0.018(2) 0.0022(11) -0.0010(11) 0.0011(10) 
O9 0.0164(11) 0.0106(10) 0.0182(11) 0.0004(9) -0.0014(8) -0.0012(8) 
C10 0.0136(15) 0.0152(15) 0.015(2) 0.0021(11) 0.0000(12) 0.0006(11) 
O10 0.0218(12) 0.0142(11) 0.0167(12) -0.0014(8) -0.0043(9) 0.0015(9) 
C11 0.0100(13) 0.0132(14) 0.0170(15) 0.0007(12) 0.0024(11) -0.0011(11) 
O11 0.0204(12) 0.0097(11) 0.0242(12) 0.0010(9) 0.0023(9) 0.0038(9) 
C12 0.0109(14) 0.0116(15) 0.016(2) 0.0017(11) -0.0009(11) -0.0008(10) 
O12 0.0191(12) 0.0159(12) 0.0156(12) 0.0000(8) -0.0007(9) -0.0007(8) 
O13 0.0186(12) 0.0136(12) 0.0233(13) 0.0005(9) 0.0063(9) 0.0010(9) 
O14 0.0200(13) 0.0317(14) 0.0195(13) -0.0052(11) 0.0016(10) -0.0070(11) 
O15 0.0157(12) 0.0156(12) 0.0270(14) 0.0012(9) -0.0039(10) -0.0011(8) 
O16 0.0243(12) 0.0139(11) 0.0172(12) -0.0047(9) -0.0061(9) 0.0049(9) 
O17 0.0160(11) 0.0132(11) 0.0148(11) -0.0004(9) -0.0010(9) 0.0005(8) 
O18 0.0342(15) 0.0226(13) 0.0195(13) -0.0001(10) -0.0058(11) 0.0109(11) 
O19 0.0205(13) 0.0360(15) 0.0185(13) -0.0058(11) 0.0008(10) -0.0085(11) 
O20 0.0159(12) 0.0106(12) 0.0288(14) 0.0011(9) -0.0053(10) -0.0004(8) 
O21 0.0247(13) 0.0152(11) 0.0194(12) -0.0030(9) -0.0066(10) 0.0026(9) 
O22 0.0160(11) 0.0127(11) 0.0190(12) -0.0003(9) 0.0024(9) 0.0007(8) 
O23 0.0172(12) 0.0110(11) 0.0185(12) 0.0009(8) -0.0015(9) -0.0006(8) 
O30 0.0258(13) 0.0175(12) 0.0169(13) 0.0003(9) 0.0012(10) -0.0011(9) 
O40 0.0281(13) 0.0144(12) 0.0167(13) 0.0014(9) 0.0012(10) 0.0025(9) 
  
_geom_special_details 
; 
 All esds (except the esd in the dihedral angle between two l.s. planes) 
 are estimated using the full covariance matrix.  The cell esds are taken 
 into account individually in the estimation of esds in distances, angles 
 and torsion angles; correlations between esds in cell parameters are only 
 used when they are defined by crystal symmetry.  An approximate (isotropic) 
 treatment of cell esds is used for estimating esds involving l.s. planes. 
; 
  
loop_ 
 _geom_bond_atom_site_label_1 
 _geom_bond_atom_site_label_2 
 _geom_bond_distance 
 _geom_bond_site_symmetry_2 
 _geom_bond_publ_flag 
La1 O5 2.451(2) . ? 
La1 O1 2.489(2) . ? 
La1 O16 2.527(2) . ? 
La1 O14 2.540(2) . ? 
La1 O13 2.543(2) . ? 
La1 O10 2.580(2) 3_665 ? 
La1 O15 2.592(2) . ? 
La1 O9 2.600(2) . ? 
La1 O17 2.658(2) . ? 
La2 O2 2.436(2) 1_545 ? 
La2 O6 2.471(2) . ? 
La2 O21 2.516(2) . ? 
La2 O19 2.543(2) . ? 
La2 O11 2.547(2) . ? 
La2 O20 2.575(2) . ? 
La2 O22 2.591(2) . ? 
La2 O23 2.636(2) . ? 
La2 O18 2.647(2) . ? 
C1 O1 1.267(4) . ? 
C1 C4 1.457(4) . ? 
C1 C2 1.464(4) . ? 
C2 O2 1.254(4) . ? 
C2 C3 1.451(4) . ? 
O2 La2 2.436(2) 1_565 ? 
C3 O3 1.255(4) . ? 
C3 C4 1.482(4) . ? 
C4 O4 1.253(4) . ? 
C5 O5 1.252(4) . ? 
C5 C6 1.459(4) . ? 
C5 C8 1.460(4) . ? 
C6 O6 1.260(4) . ? 
C6 C7 1.460(4) . ? 
C7 O7 1.251(4) . ? 
C7 C8 1.465(4) . ? 
C8 O8 1.261(4) . ? 
C9 O9 1.273(3) . ? 
C9 C12 1.460(4) . ? 
C9 C10 1.469(4) . ? 
C10 O10 1.249(4) . ? 
C10 C11 1.475(4) . ? 
O10 La1 2.580(2) 3_665 ? 
C11 O11 1.250(4) . ? 
C11 C12 1.476(4) . ? 
C12 O12 1.254(4) . ? 
  
loop_ 
 _geom_angle_atom_site_label_1 
 _geom_angle_atom_site_label_2 
 _geom_angle_atom_site_label_3 
 _geom_angle 
 _geom_angle_site_symmetry_1 
 _geom_angle_site_symmetry_3 
 _geom_angle_publ_flag 
O5 La1 O1 132.75(8) . . ? 
O5 La1 O16 67.11(7) . . ? 
O1 La1 O16 142.54(8) . . ? 
O5 La1 O14 95.10(8) . . ? 
O1 La1 O14 75.27(8) . . ? 
O16 La1 O14 71.02(8) . . ? 
O5 La1 O13 131.96(7) . . ? 
O1 La1 O13 71.04(7) . . ? 
O16 La1 O13 123.19(8) . . ? 
O14 La1 O13 132.92(8) . . ? 
O5 La1 O10 142.62(7) . 3_665 ? 
O1 La1 O10 80.00(7) . 3_665 ? 
O16 La1 O10 75.57(7) . 3_665 ? 
O14 La1 O10 74.19(8) . 3_665 ? 
O13 La1 O10 68.42(8) . 3_665 ? 
O5 La1 O15 64.59(7) . . ? 
O1 La1 O15 68.93(7) . . ? 
O16 La1 O15 111.88(7) . . ? 
O14 La1 O15 68.71(8) . . ? 
O13 La1 O15 124.63(8) . . ? 
O10 La1 O15 136.23(7) 3_665 . ? 
O5 La1 O9 73.33(7) . . ? 
O1 La1 O9 135.91(7) . . ? 
O16 La1 O9 74.98(7) . . ? 
O14 La1 O9 145.93(7) . . ? 
O13 La1 O9 66.69(7) . . ? 
O10 La1 O9 95.46(7) 3_665 . ? 
O15 La1 O9 128.32(7) . . ? 
O5 La1 O17 74.27(7) . . ? 
O1 La1 O17 81.51(7) . . ? 
O16 La1 O17 135.02(7) . . ? 
O14 La1 O17 136.14(7) . . ? 
O13 La1 O17 69.29(7) . . ? 
O10 La1 O17 137.35(7) 3_665 . ? 
O15 La1 O17 68.36(8) . . ? 
O9 La1 O17 72.56(7) . . ? 
O2 La2 O6 133.41(8) 1_545 . ? 
O2 La2 O21 68.95(7) 1_545 . ? 
O6 La2 O21 142.45(8) . . ? 
O2 La2 O19 96.08(8) 1_545 . ? 
O6 La2 O19 75.17(8) . . ? 
O21 La2 O19 72.27(8) . . ? 
O2 La2 O11 134.01(7) 1_545 . ? 
O6 La2 O11 70.89(7) . . ? 
O21 La2 O11 118.40(7) . . ? 
O19 La2 O11 129.87(8) . . ? 
O2 La2 O20 67.55(7) 1_545 . ? 
O6 La2 O20 66.76(7) . . ? 
O21 La2 O20 115.94(8) . . ? 
O19 La2 O20 68.26(8) . . ? 
O11 La2 O20 125.66(7) . . ? 
O2 La2 O22 72.70(7) 1_545 . ? 
O6 La2 O22 134.38(7) . . ? 
O21 La2 O22 75.58(7) . . ? 
O19 La2 O22 147.84(8) . . ? 
O11 La2 O22 66.75(7) . . ? 
O20 La2 O22 129.04(7) . . ? 
O2 La2 O23 75.73(7) 1_545 . ? 
O6 La2 O23 80.16(7) . . ? 
O21 La2 O23 137.14(7) . . ? 
O19 La2 O23 136.39(8) . . ? 
O11 La2 O23 71.55(7) . . ? 
O20 La2 O23 69.11(8) . . ? 
O22 La2 O23 71.26(7) . . ? 
O2 La2 O18 139.41(8) 1_545 . ? 
O6 La2 O18 82.00(8) . . ? 
O21 La2 O18 70.46(8) . . ? 
O19 La2 O18 71.62(9) . . ? 
O11 La2 O18 68.10(8) . . ? 
O20 La2 O18 133.92(8) . . ? 
O22 La2 O18 97.03(8) . . ? 
O23 La2 O18 139.30(7) . . ? 
O1 C1 C4 136.2(3) . . ? 
O1 C1 C2 133.5(3) . . ? 
C4 C1 C2 90.3(2) . . ? 
C1 O1 La1 143.1(2) . . ? 
O2 C2 C3 136.2(3) . . ? 
O2 C2 C1 133.4(3) . . ? 
C3 C2 C1 90.4(2) . . ? 
C2 O2 La2 148.7(2) . 1_565 ? 
O3 C3 C2 134.2(3) . . ? 
O3 C3 C4 135.9(3) . . ? 
C2 C3 C4 89.9(2) . . ? 
O4 C4 C1 134.2(3) . . ? 
O4 C4 C3 136.4(3) . . ? 
C1 C4 C3 89.4(2) . . ? 
O5 C5 C6 133.2(3) . . ? 
O5 C5 C8 136.7(3) . . ? 
C6 C5 C8 90.0(2) . . ? 
C5 O5 La1 148.9(2) . . ? 
O6 C6 C5 133.1(3) . . ? 
O6 C6 C7 136.6(3) . . ? 
C5 C6 C7 90.2(2) . . ? 
C6 O6 La2 140.4(2) . . ? 
O7 C7 C6 135.0(3) . . ? 
O7 C7 C8 135.1(3) . . ? 
C6 C7 C8 89.8(2) . . ? 
O8 C8 C5 134.2(3) . . ? 
O8 C8 C7 135.8(3) . . ? 
C5 C8 C7 90.0(2) . . ? 
O9 C9 C12 134.0(3) . . ? 
O9 C9 C10 135.4(3) . . ? 
C12 C9 C10 90.6(2) . . ? 
C9 O9 La1 128.7(2) . . ? 
O10 C10 C9 136.9(3) . . ? 
O10 C10 C11 133.8(3) . . ? 
C9 C10 C11 89.3(2) . . ? 
C10 O10 La1 141.5(2) . 3_665 ? 
O11 C11 C10 135.2(3) . . ? 
O11 C11 C12 135.1(3) . . ? 
C10 C11 C12 89.7(2) . . ? 
C11 O11 La2 135.8(2) . . ? 
O12 C12 C9 135.5(3) . . ? 
O12 C12 C11 134.9(3) . . ? 
C9 C12 C11 89.6(2) . . ? 
  
_refine_diff_density_max    1.475 
_refine_diff_density_min   -1.602 
_refine_diff_density_rms    0.156 
  
#===END
